# Supplementary material for: Computational insights into the mechanisms and origins of switchable selectivity in gold(i)-catalyzed annulation of ynamides with isoxazoles via 6π-electrocyclizations of azaheptatrienyl cations
Source: Royal Society of Chemistry journal article supplement (doi:10.1039/d3ra02839a), 2023-01-01
Supplement: d3ra02839a1.pdf [file d3ra02839a1.pdf]

## Supporting Information

# Computational insights into the mechanisms and origins of switchable selectivity in Gold(I)-catalyzed annulation of ynamides with Isoxazoles via $6\pi$ -electrocyclizations of azaheptatrienyl cations

Abosede Adejoke Ogunlana,<sup>\*a</sup> Yuan Liu,<sup>b</sup> Segun D. Oladipo<sup>c</sup> and Adejoke Deborah Osinubi<sup>a</sup>

<sup>a</sup>Department of Chemical Sciences, Tai Solarin University of Education, Ogun State, Nigeria.

<sup>b</sup>School of Chemistry and Chemical Engineering, Nantong University, 9 Seyuan Road, Nantong 226019, China.

<sup>c</sup>Department of Chemical Sciences, Olabisi Onabanjo University, 2002 Ago-Iwoye, Nigeria.

\*Corresponding author: [ogunlanaaa@tasued.edu.ng](mailto:ogunlanaaa@tasued.edu.ng)

### Contents

|                                                    |               |
|----------------------------------------------------|---------------|
| 1. <b>Figures S1~S3</b> .....                      | <b>S2-S4</b>  |
| 2. <b>Scheme S1a~S1b</b> .....                     | <b>S5-S6</b>  |
| 3. <b>Cartesian Coordinates and Energies</b> ..... | <b>S7-S97</b> |

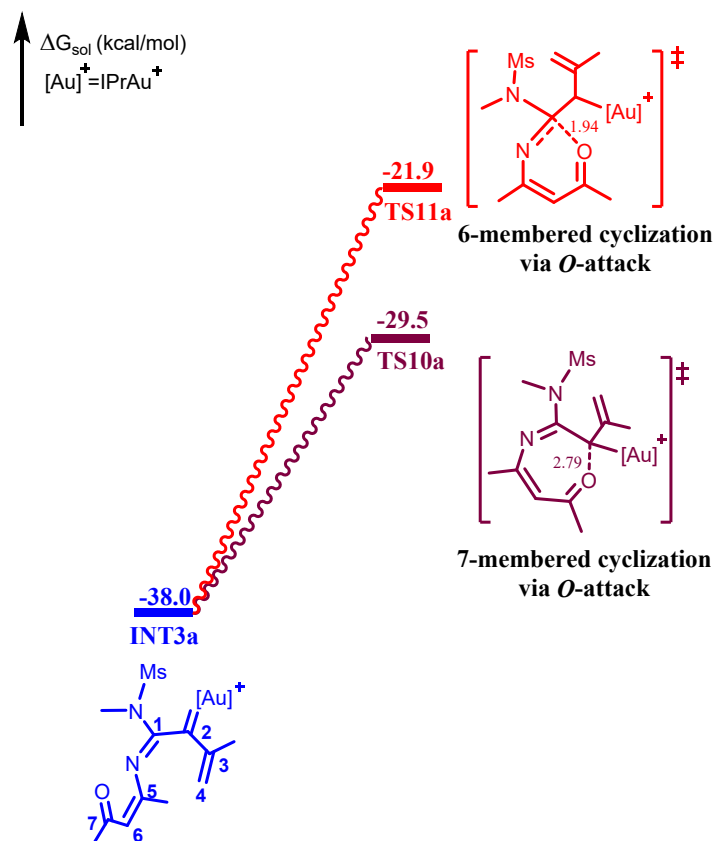

**Figure S1:** Energy profile showing the *O*-atom induced intramolecular seven-membered and six membered cyclization in the gold(I)-catalyzed annulation of **1a** with **2**. Bond distances are given in Å.

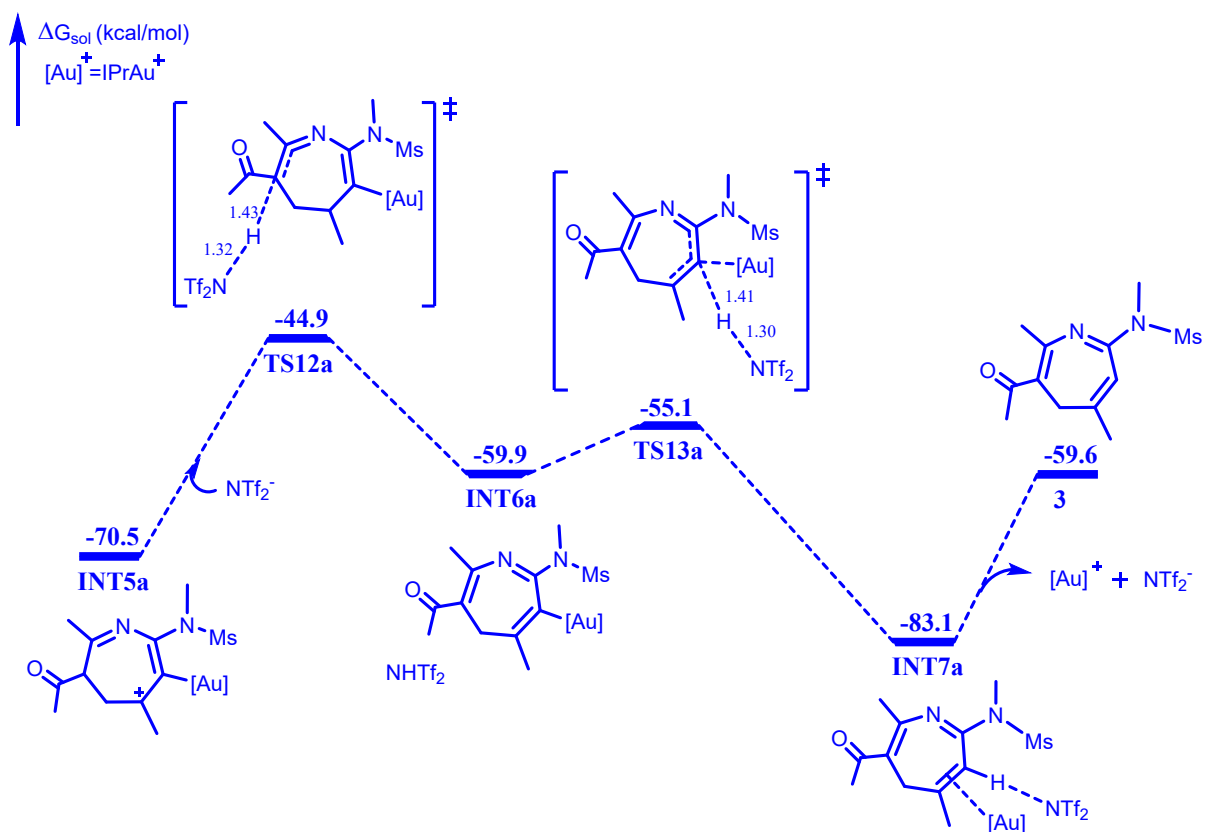

**Figure S2:** Energy profile showing the bis(trifluoromethane)sulfonimide ion ( $\text{NTf}_2^-$  counterion) assisted proton transfer to afford the expected 4*H*-azepine product **3**. Bond distances are given in Å.

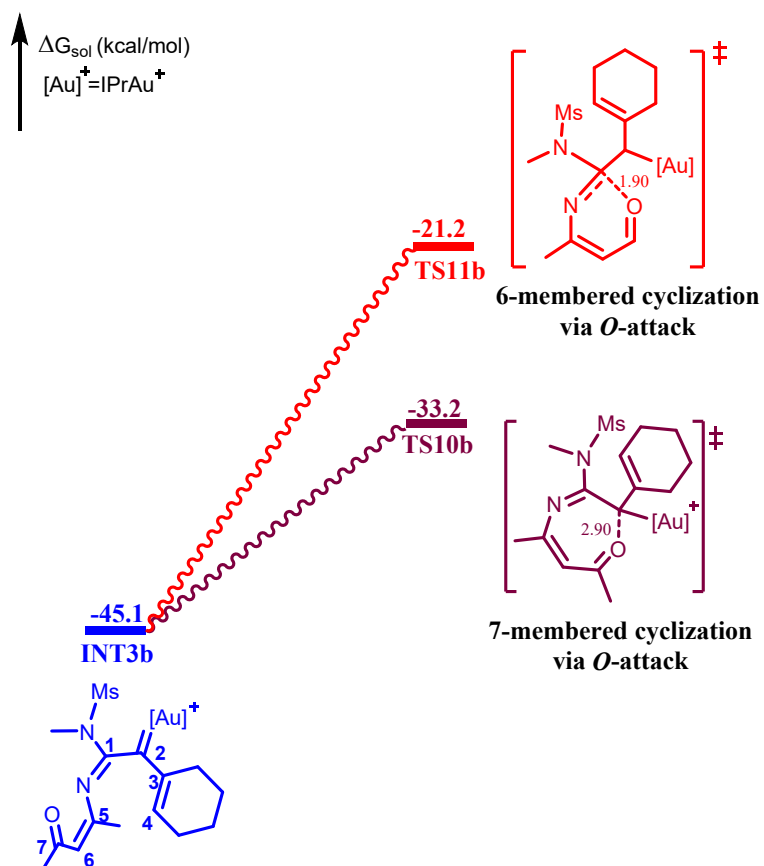

**Figure S3:** Energy profile showing the *O*-atom induced intramolecular seven-membered and six membered cyclization in the gold(I)-catalyzed annulation of **1b** with **2**. Bond distances are given in Å.

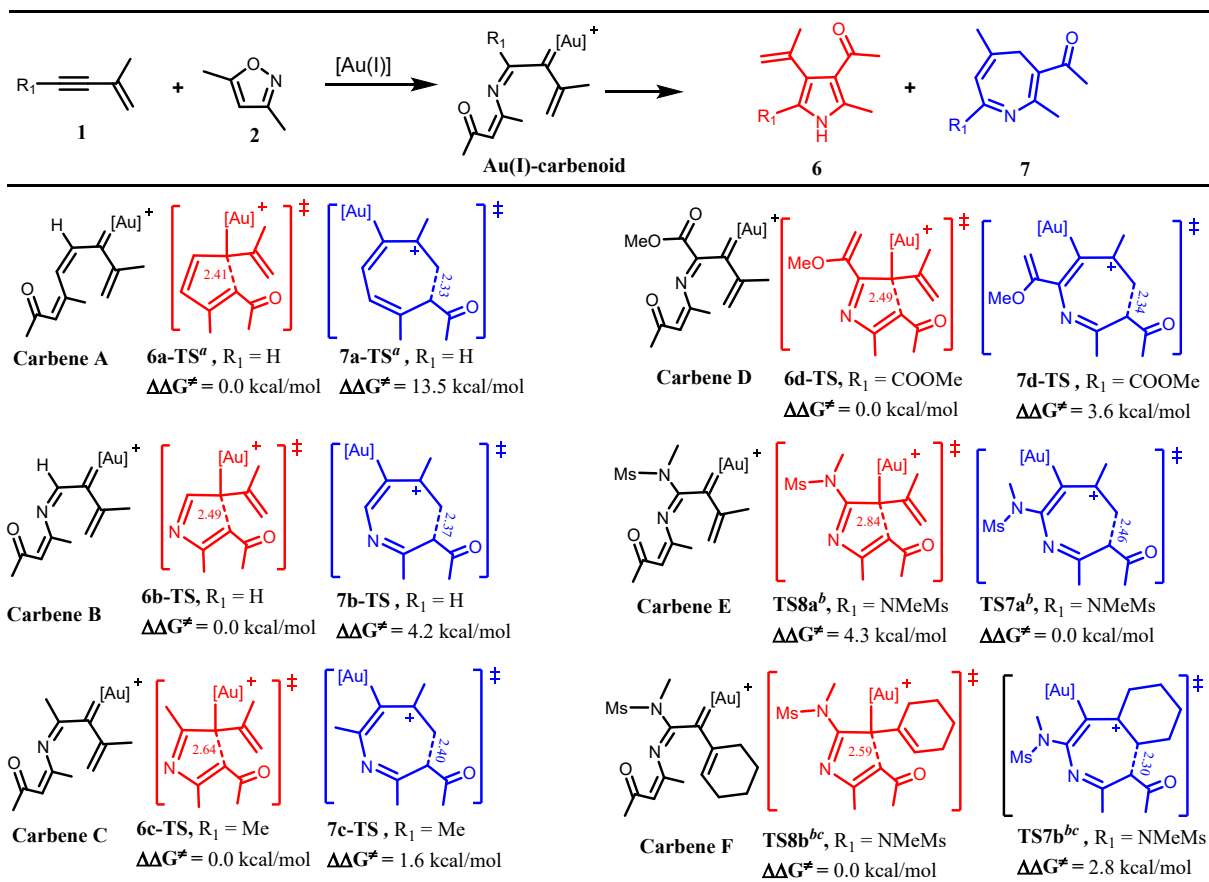

<sup>a</sup> the 3,5-dimethylisoxazole is replaced with 2,4-dimethylfuran, <sup>b</sup> experimentally reported compound by Gir and Liu<sup>8</sup>, <sup>c</sup> the propenyl unit in **1a** is replaced with cyclohexene. The Ms signifies the methanesulfonyl group.

**Scheme S1a:** Predictive analysis of some  $\alpha$ -imino gold(I)-carbene intermediates. Bond distances are given in Å.

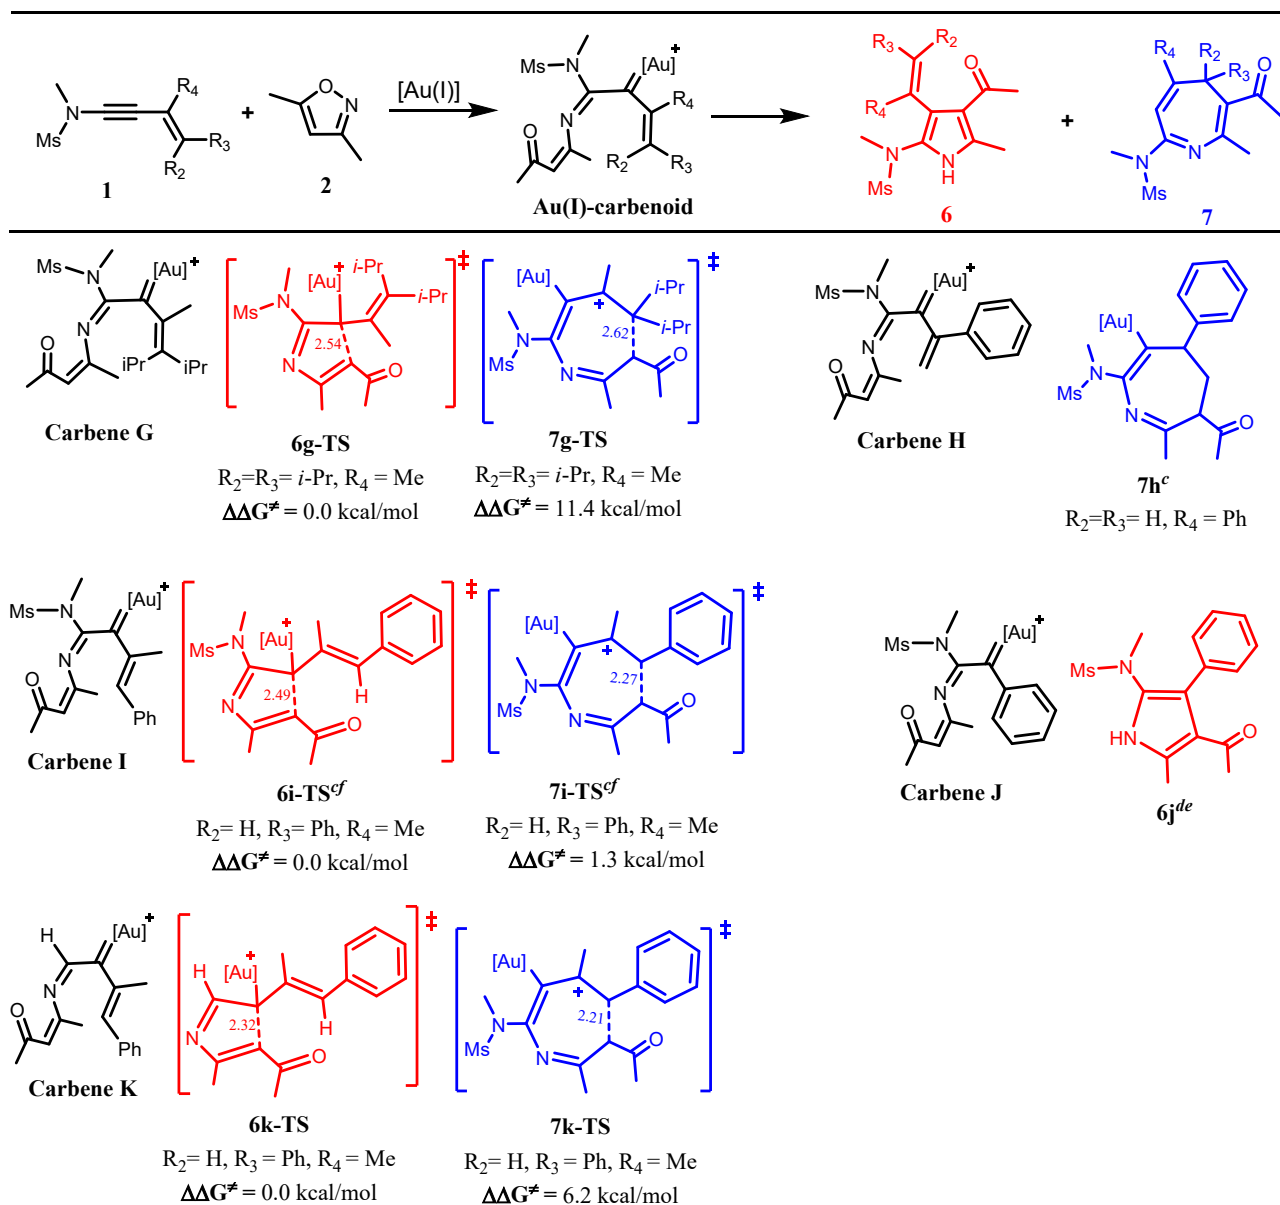

<sup>c</sup>experimentally reported compound by Gir and Liu<sup>8</sup>, <sup>d</sup> experimentally reported by Ye's group<sup>6a</sup>, <sup>e</sup> the propenyl unit in **1a** is replaced with a phenyl group, <sup>f</sup>both corresponding 5- and 7-membered products were obtained (43% and 48% respectively, in favor of the 7-membered **7i-TS**). The *i*-Pr signifies iso-propyl group and Ms, methanesulfonyl group.

**Scheme S1b:** Predictive analysis of some  $\alpha$ -imino gold(I)-carbene intermediates. Bond distances are given in Å.

**Cartesian coordinates and electronic energies for all of the calculated structure**

1a

Zero-point correction= 0.173264 (Hartree/Particle)  
 Thermal correction to Energy= 0.186615  
 Thermal correction to Enthalpy= 0.187559  
 Thermal correction to Gibbs Free Energy= 0.132310  
 Sum of electronic and zero-point Energies= -876.086510  
 Sum of electronic and thermal Energies= -876.073158  
 Sum of electronic and thermal Enthalpies= -876.072214  
 Sum of electronic and thermal Free Energies= -876.127463  
 M06/6-311++G(d,p)-SDD/SMD//M06/6-31G(d) energy in DCE solvent = -876.42646505

Cartesian coordinates:

|   |             |             |             |
|---|-------------|-------------|-------------|
| C | -1.73710100 | 0.34241700  | -0.08822200 |
| C | -0.55176800 | 0.55932100  | -0.23637300 |
| N | 0.75808000  | 0.83398600  | -0.37665400 |
| S | 1.84192200  | -0.45920300 | -0.09463500 |
| O | 1.30817500  | -1.61708800 | -0.77826900 |
| O | 3.16589900  | 0.06782200  | -0.36774300 |
| C | 1.22274500  | 2.20679200  | -0.16723900 |
| H | 1.11636700  | 2.51861500  | 0.88196700  |
| H | 2.26906900  | 2.27253400  | -0.47322800 |
| H | 0.62059400  | 2.86607500  | -0.79936500 |
| C | -3.11868200 | 0.01012800  | 0.02854100  |
| C | -4.03596800 | 0.92095500  | 0.38122600  |
| H | -3.76715800 | 1.95061500  | 0.60510800  |
| H | -5.08906200 | 0.65339800  | 0.44065000  |
| C | -3.46857700 | -1.41722700 | -0.28529800 |
| H | -4.54246200 | -1.59292400 | -0.15618200 |
| H | -3.19117200 | -1.66976200 | -1.31683600 |
| H | -2.92049500 | -2.10976000 | 0.36695200  |
| C | 1.68329300  | -0.72708100 | 1.66233400  |
| H | 0.63362000  | -0.94089900 | 1.88664700  |
| H | 2.31017300  | -1.58456800 | 1.92388600  |
| H | 2.02695800  | 0.16831300  | 2.18942000  |

**1b**

Zero-point correction= 0.239202 (Hartree/Particle)  
 Thermal correction to Energy= 0.254460  
 Thermal correction to Enthalpy= 0.255404  
 Thermal correction to Gibbs Free Energy= 0.194079  
 Sum of electronic and zero-point Energies= -992.673281  
 Sum of electronic and thermal Energies= -992.658023  
 Sum of electronic and thermal Enthalpies= -992.657079  
 Sum of electronic and thermal Free Energies= -992.718404  
 M06/6-311++G(d,p)-SDD/SMD//M06/6-31G(d) energy in DCE solvent = -993.10843995

Cartesian coordinates:

|   |             |             |             |
|---|-------------|-------------|-------------|
| C | -0.68758000 | 0.31321600  | -0.08914200 |
| C | 0.49365000  | 0.57822700  | -0.18107100 |
| N | 1.81076300  | 0.85269800  | -0.26469600 |
| S | 2.87404600  | -0.48247800 | -0.17021200 |
| O | 2.35380700  | -1.50913800 | -1.04681800 |
| O | 4.20930200  | 0.06679800  | -0.31884900 |
| C | 2.28847400  | 2.16106800  | 0.18682900  |
| H | 2.17262900  | 2.28651900  | 1.27362000  |
| H | 3.33926400  | 2.26530700  | -0.09205400 |
| H | 1.70194300  | 2.92934200  | -0.32565700 |
| C | 2.66611000  | -1.03092200 | 1.51599500  |
| H | 3.28299500  | -1.92402200 | 1.65184300  |
| H | 2.99847700  | -0.23501100 | 2.18969000  |
| H | 1.60989800  | -1.26886100 | 1.67491100  |
| C | -2.08791600 | 0.06901700  | -0.01563700 |
| C | -2.57987300 | -1.17651400 | 0.10534400  |
| C | -2.98087900 | 1.28640900  | -0.09621700 |
| C | -4.04265600 | -1.49085600 | 0.12847200  |
| H | -1.88052000 | -2.01062400 | 0.17649400  |
| C | -4.40844700 | 0.97344600  | 0.33129800  |
| H | -2.55532100 | 2.09014400  | 0.52264800  |

|   |             |             |             |
|---|-------------|-------------|-------------|
| C | -4.89124400 | -0.31019300 | -0.32882800 |
| H | -4.24047900 | -2.37310600 | -0.49893800 |
| H | -5.06769400 | 1.81692100  | 0.08572200  |
| H | -4.80875900 | -0.20435800 | -1.42255100 |
| H | -4.33796800 | -1.79087000 | 1.14991500  |
| H | -5.95122100 | -0.49349300 | -0.10739100 |
| H | -4.44406600 | 0.85161000  | 1.42616600  |
| H | -2.96664600 | 1.67014900  | -1.13007500 |

## 2

Zero-point correction= 0.113467 (Hartree/Particle)  
 Thermal correction to Energy= 0.120398  
 Thermal correction to Enthalpy= 0.121343  
 Thermal correction to Gibbs Free Energy= 0.082526  
 Sum of electronic and zero-point Energies= -324.345733  
 Sum of electronic and thermal Energies= -324.338801  
 Sum of electronic and thermal Enthalpies= -324.337857  
 Sum of electronic and thermal Free Energies= -324.376674  
 M06/6-311++G(d,p)-SDD/SMD//M06/6-31G(d) energy in DCE solvent = -324.54996986

### Cartesian coordinates:

|   |             |             |             |
|---|-------------|-------------|-------------|
| C | -1.07870500 | -0.16613100 | -0.00000100 |
| C | 0.00667500  | -0.98256600 | -0.00023900 |
| C | 1.10967100  | -0.08487000 | 0.00000400  |
| O | -0.67624700 | 1.11515200  | -0.00013300 |
| H | 0.02420700  | -2.06506400 | -0.00035000 |
| N | 0.71096000  | 1.16573700  | -0.00012700 |
| C | 2.56250600  | -0.40035100 | 0.00011500  |
| H | 2.84001500  | -0.98745200 | 0.88448400  |
| H | 2.84013500  | -0.98752600 | -0.88416600 |
| H | 3.14618400  | 0.52596400  | 0.00011800  |
| C | -2.53952200 | -0.40187300 | 0.00011800  |
| H | -3.00974800 | 0.04680200  | 0.88410000  |
| H | -3.00987500 | 0.04677100  | -0.88381100 |
| H | -2.75296400 | -1.47529100 | 0.00014800  |

## 3

Zero-point correction= 0.293423 (Hartree/Particle)  
 Thermal correction to Energy= 0.312596  
 Thermal correction to Enthalpy= 0.313540  
 Thermal correction to Gibbs Free Energy= 0.246409  
 Sum of electronic and zero-point Energies= -1200.547393  
 Sum of electronic and thermal Energies= -1200.528221  
 Sum of electronic and thermal Enthalpies= -1200.527277  
 Sum of electronic and thermal Free Energies= -1200.594408  
 M06/6-311++G(d,p)-SDD/SMD//M06/6-31G(d) energy in DCE solvent = -1201.0903308

### Cartesian coordinates:

|   |             |             |             |
|---|-------------|-------------|-------------|
| C | 0.19699900  | 1.70141600  | -0.69909900 |
| C | -0.62427900 | 0.53920400  | -0.37977000 |
| N | -2.00380400 | 0.74684200  | -0.30655400 |
| S | -3.01898500 | -0.46101300 | 0.40519500  |
| O | -2.44837800 | -0.90139100 | 1.66233000  |
| O | -4.35402100 | 0.11570000  | 0.36683900  |
| N | -0.18250200 | -0.67090900 | -0.24205600 |
| C | 1.12689200  | -1.07985700 | -0.31324300 |
| C | 3.55192800  | -0.88689300 | 0.20953200  |
| C | 2.16748400  | -0.38893500 | 0.26013000  |
| C | 1.28475700  | -2.40010000 | -1.00869400 |
| H | 0.30875600  | -2.74980200 | -1.36100100 |
| H | 1.97437200  | -2.31891900 | -1.85573800 |
| H | 1.72859200  | -3.15339200 | -0.34851600 |



|   |             |             |             |
|---|-------------|-------------|-------------|
| O | 3.86374800  | -1.93698500 | -0.33684800 |
| C | 4.63592200  | -0.06205900 | 0.87602500  |
| H | 4.46691700  | 0.02296800  | 1.95823700  |
| H | 5.59415200  | -0.56012100 | 0.70579800  |
| H | 4.68844200  | 0.96041400  | 0.47782900  |
| C | -2.55423400 | 2.09416000  | -0.43042800 |
| H | -3.61954800 | 2.05472000  | -0.19880900 |
| H | -2.05970700 | 2.78475700  | 0.26338900  |
| H | -2.43796600 | 2.46376900  | -1.45640700 |
| C | 1.39345400  | 1.87699200  | -0.10711200 |
| C | 1.83027600  | 0.90844900  | 0.95429400  |
| H | 1.01723500  | 0.74689900  | 1.67992300  |
| C | 2.31894300  | 2.98205400  | -0.48731900 |
| H | 3.26609900  | 2.57400800  | -0.87060800 |
| H | 1.89567700  | 3.63159700  | -1.26189600 |
| H | 2.68108000  | 1.31030000  | 1.51392600  |
| H | 2.57614600  | 3.59853900  | 0.38588900  |
| H | -0.15672700 | 2.41170500  | -1.44666100 |
| C | -2.97337000 | -1.78904100 | -0.77496800 |
| H | -3.34348500 | -1.41050900 | -1.73150700 |
| H | -1.94649800 | -2.15297600 | -0.84701300 |
| H | -3.64507800 | -2.56019800 | -0.38436000 |

#### 4

Zero-point correction= 0.359124 (Hartree/Particle)  
 Thermal correction to Energy= 0.380780  
 Thermal correction to Enthalpy= 0.381725  
 Thermal correction to Gibbs Free Energy= 0.309449  
 Sum of electronic and zero-point Energies= -1317.146924  
 Sum of electronic and thermal Energies= -1317.125268  
 Sum of electronic and thermal Enthalpies= -1317.124324  
 Sum of electronic and thermal Free Energies= -1317.196600  
 M06/6-311++G(d,p)-SDD/SMD//M06/6-31G(d) energy in DCE solvent = -1317.78830933

#### Cartesian coordinates:

|   |             |             |             |
|---|-------------|-------------|-------------|
| C | 0.72782300  | 0.13637600  | 0.26853000  |
| C | -0.20535200 | 1.11924200  | 0.52194000  |
| N | -1.58321700 | 1.11821000  | 0.80040800  |
| S | -2.64753300 | 0.80871600  | -0.48481700 |
| O | -2.32693100 | -0.43296000 | -1.17596200 |
| O | -3.98357500 | 1.00826000  | 0.05421200  |
| N | 0.44169000  | 2.34708300  | 0.45696900  |
| C | 1.75571800  | 2.18323800  | 0.17614000  |
| C | 3.33258200  | 0.27794300  | -0.16737400 |
| C | 1.98053700  | 0.81170100  | 0.04431200  |
| C | 2.67831700  | 3.34279300  | 0.08890200  |
| H | 3.51887100  | 3.23121800  | 0.78306000  |
| H | 3.12468300  | 3.42286200  | -0.90851100 |
| H | 2.15097100  | 4.27836600  | 0.31788700  |
| O | 4.26731100  | 1.02930500  | -0.41261600 |
| C | 3.57703900  | -1.20665100 | -0.05230400 |
| H | 4.61751500  | -1.36194700 | 0.24923900  |
| H | 2.89364100  | -1.70128200 | 0.64742100  |
| H | 3.44495500  | -1.68126000 | -1.03484100 |
| C | -2.05172900 | 0.63627700  | 2.10733500  |
| H | -2.09735200 | -0.46044700 | 2.15471300  |
| H | -1.34042800 | 0.99661200  | 2.85712700  |
| H | -3.04100900 | 1.05316700  | 2.31417300  |
| C | -2.24961800 | 2.14921100  | -1.58827300 |

|   |             |             |             |
|---|-------------|-------------|-------------|
| H | -2.45382900 | 3.09798000  | -1.08495300 |
| H | -1.20260600 | 2.07377000  | -1.89516300 |
| H | -2.90182100 | 2.03168700  | -2.45885100 |
| C | 0.42479500  | -1.30531900 | 0.18336200  |
| C | 0.07401200  | -2.00084700 | 1.27375700  |
| C | 0.48092900  | -1.93699100 | -1.18444900 |
| C | -0.33416700 | -3.44251500 | 1.24997500  |
| C | 0.46976700  | -3.45780300 | -1.11649700 |
| H | -0.38721800 | -1.57627600 | -1.75794400 |
| C | -0.62401900 | -3.92658300 | -0.16617300 |
| H | 0.46159000  | -4.05807200 | 1.70569300  |
| H | 1.44649000  | -3.82314700 | -0.75428400 |
| H | -0.72348600 | -5.02024800 | -0.18284300 |
| H | -1.21573600 | -3.58632800 | 1.89352900  |
| H | -1.58734900 | -3.50946100 | -0.50149500 |
| H | 0.32703800  | -3.88035800 | -2.12015100 |
| H | 1.36635100  | -1.57176300 | -1.72652800 |
| H | 0.08919800  | -1.49846400 | 2.24413800  |
| H | -0.01350300 | 3.22962200  | 0.65386700  |

## 5

Zero-point correction= 0.359941 (Hartree/Particle)  
 Thermal correction to Energy= 0.381042  
 Thermal correction to Enthalpy= 0.381986  
 Thermal correction to Gibbs Free Energy= 0.311106  
 Sum of electronic and zero-point Energies= -1317.124700  
 Sum of electronic and thermal Energies= -1317.103600  
 Sum of electronic and thermal Enthalpies= -1317.102655  
 Sum of electronic and thermal Free Energies= -1317.173535  
 M06/6-311++G(d,p)-SDD/SMD//M06/6-31G(d) energy in DCE solvent = -1317.76011170

### Cartesian coordinates:

|   |             |             |             |
|---|-------------|-------------|-------------|
| C | 0.03131900  | -1.35439400 | -0.66244700 |
| C | 0.99928100  | -0.46414000 | -0.05423500 |
| N | 2.30268500  | -0.95540100 | 0.11001700  |
| S | 3.63725500  | 0.10676400  | -0.06924400 |
| O | 4.80122500  | -0.76574400 | -0.06954900 |
| O | 3.39391300  | 1.01309300  | -1.17584800 |
| N | 0.79582000  | 0.77081700  | 0.28372200  |
| C | -0.34328400 | 1.49436800  | 0.00529200  |
| C | -2.83209100 | 1.73904400  | -0.20186500 |
| C | -1.60935800 | 1.02006400  | 0.20687900  |
| C | 0.01108700  | 2.85673200  | -0.52786600 |
| H | -0.76690000 | 3.28485300  | -1.16473300 |
| H | 0.20728900  | 3.56119700  | 0.29347300  |
| H | 0.93556200  | 2.78045200  | -1.11135500 |
| O | -3.76524100 | 1.12777600  | -0.70219200 |
| C | -2.98380700 | 3.22432400  | 0.04496700  |
| H | -2.23934600 | 3.64288700  | 0.72916900  |
| H | -2.94296600 | 3.77337700  | -0.90478400 |
| H | -3.98749800 | 3.38296200  | 0.45583100  |
| C | 2.57941700  | -2.38781200 | 0.05232700  |
| H | 3.50822000  | -2.59673700 | 0.58662400  |
| H | 1.75572000  | -2.91603100 | 0.54221500  |
| H | 2.68545800  | -2.75568200 | -0.97713500 |
| C | -1.28386500 | -1.28774900 | -0.35838000 |
| C | -1.72471500 | -0.39193300 | 0.76601000  |
| H | -0.94050100 | -0.43557600 | 1.53791000  |
| C | -2.32381800 | -2.03122400 | -1.13101400 |
| H | -2.84055900 | -1.29868800 | -1.77446300 |

|   |             |             |             |
|---|-------------|-------------|-------------|
| H | -1.84786300 | -2.76594000 | -1.79495500 |
| C | 3.64802200  | 1.03352900  | 1.44861500  |
| H | 2.71312000  | 1.59466900  | 1.50813200  |
| H | 3.75000100  | 0.33057200  | 2.27998800  |
| H | 4.51675900  | 1.69800800  | 1.40193400  |
| C | -3.36381300 | -2.66585400 | -0.21088000 |
| H | -2.87363000 | -3.39750500 | 0.45350900  |
| H | -4.09871800 | -3.22239500 | -0.80753700 |
| C | -4.04550200 | -1.58205000 | 0.61077000  |
| H | -4.80261900 | -2.02357100 | 1.27411500  |
| H | -4.56294600 | -0.89154100 | -0.06485600 |
| C | -3.03150300 | -0.82015000 | 1.46052700  |
| H | -2.73563800 | -1.48197300 | 2.29035900  |
| H | -3.50231600 | 0.05439600  | 1.93081400  |
| H | 0.38036200  | -2.03140300 | -1.44399600 |

### NTf2 counter-ion

Zero-point correction= 0.055863 (Hartree/Particle)

Thermal correction to Energy= 0.069904

Thermal correction to Enthalpy= 0.070848

Thermal correction to Gibbs Free Energy= 0.012497

Sum of electronic and zero-point Energies= -1826.762563

Sum of electronic and thermal Energies= -1826.748522

Sum of electronic and thermal Enthalpies= -1826.747578

Sum of electronic and thermal Free Energies= -1826.805929

M06/6-311++G(d,p)/SMD//M06/6-31G(d) energy in DCE solvent = -1827.21703786

### Cartesian coordinates:

|   |             |             |             |
|---|-------------|-------------|-------------|
| N | -0.00003900 | 0.00011500  | 0.83895000  |
| S | 1.14402700  | 0.83778400  | 0.08523400  |
| O | 0.88354300  | 1.21144800  | -1.29913300 |
| O | 1.66376800  | 1.84223300  | 1.00387200  |
| C | 2.52626300  | -0.38296000 | -0.03086400 |
| S | -1.14393900 | -0.83766900 | 0.08510600  |
| O | -0.88336500 | -1.21110600 | -1.29930700 |
| O | -1.66356700 | -1.84230100 | 1.00360900  |
| C | -2.52635300 | 0.38286300  | -0.03090600 |
| F | 3.57018400  | 0.19872400  | -0.62154400 |
| F | 2.90636100  | -0.79207100 | 1.17403400  |
| F | 2.17725100  | -1.44326900 | -0.74688000 |
| F | -2.17759700 | 1.44311500  | -0.74712700 |
| F | -3.57028100 | -0.19905600 | -0.62134500 |
| F | -2.90632100 | 0.79208300  | 1.17399500  |

### Au(I)-catalyst

Zero-point correction= 0.344340 (Hartree/Particle)

Thermal correction to Energy= 0.365991

Thermal correction to Enthalpy= 0.366935

Thermal correction to Gibbs Free Energy= 0.291163

Sum of electronic and zero-point Energies= -979.809924

Sum of electronic and thermal Energies= -979.788273

Sum of electronic and thermal Enthalpies= -979.787329

Sum of electronic and thermal Free Energies= -979.863101

M06/6-311++G(d,p)-SDD/SMD//M06/6-31G(d)-LANL2DZ energy in DCE solvent = -980.78186308

### Cartesian coordinates:

|    |             |             |             |
|----|-------------|-------------|-------------|
| Au | 0.00364900  | -1.51779700 | -0.08955200 |
| C  | -0.00242700 | 0.48535000  | 0.06560900  |
| N  | 1.08010500  | 1.27957700  | 0.13212400  |
| C  | -0.68124300 | 2.59926000  | 0.23808500  |

|   |             |             |             |
|---|-------------|-------------|-------------|
| C | 0.67511200  | 2.59958100  | 0.23987000  |
| H | -1.40423200 | 3.40213200  | 0.30270800  |
| H | 1.39711400  | 3.40311200  | 0.30754200  |
| N | -1.08504100 | 1.27876400  | 0.12959000  |
| C | -2.45418800 | 0.83064600  | 0.05534700  |
| C | -3.12804200 | 0.56323600  | 1.25189900  |
| C | -3.03158600 | 0.69646100  | -1.21196800 |
| C | -4.45065900 | 0.13457200  | 1.14871500  |
| C | -4.35801900 | 0.26929100  | -1.26061300 |
| C | -5.05873800 | -0.00995900 | -0.09307900 |
| H | -5.00751700 | -0.08299100 | 2.05901100  |
| H | -4.84159400 | 0.15906900  | -2.23023200 |
| H | -6.09391500 | -0.33985900 | -0.15076000 |
| C | 2.44964200  | 0.83124400  | 0.06719900  |
| C | 3.05398400  | 0.75456600  | -1.19280600 |
| C | 3.09729300  | 0.50816800  | 1.26398200  |
| C | 4.37910600  | 0.32283800  | -1.23295000 |
| C | 4.42222900  | 0.08427700  | 1.16983800  |
| C | 5.05530600  | -0.00825400 | -0.06436300 |
| H | 4.88171300  | 0.25133500  | -2.19642900 |
| H | 4.96026900  | -0.17305800 | 2.08110000  |
| H | 6.09067300  | -0.33867200 | -0.11517000 |
| C | 2.31472300  | 1.12828700  | -2.44238000 |
| H | 2.01325000  | 2.18516200  | -2.44068400 |
| H | 2.93894800  | 0.96566200  | -3.32692900 |
| H | 1.39736600  | 0.53566400  | -2.57170000 |
| C | 2.39977800  | 0.60478500  | 2.58741100  |
| H | 1.95346800  | 1.59520900  | 2.75130900  |
| H | 1.58592000  | -0.13017900 | 2.67389400  |
| H | 3.09923100  | 0.41639200  | 3.40833600  |
| C | -2.46190400 | 0.73032200  | 2.58434100  |
| H | -2.12701100 | 1.76308500  | 2.75274400  |
| H | -3.14887000 | 0.47163600  | 3.39657100  |
| H | -1.57529500 | 0.08727900  | 2.68350400  |
| C | -2.25782600 | 0.98460800  | -2.46344400 |
| H | -1.73790200 | 1.95153000  | -2.42019400 |
| H | -1.49087100 | 0.21816500  | -2.65065800 |
| H | -2.91973300 | 1.00125700  | -3.33548400 |

#### INT1a

Zero-point correction= 0.519053 (Hartree/Particle)

Thermal correction to Energy= 0.555042

Thermal correction to Enthalpy= 0.555986

Thermal correction to Gibbs Free Energy= 0.448993

Sum of electronic and zero-point Energies= -1855.963696

Sum of electronic and thermal Energies= -1855.927706

Sum of electronic and thermal Enthalpies= -1855.926762

Sum of electronic and thermal Free Energies= -1856.033756

M06/6-311++G(d,p)-SDD/SMD//M06/6-31G(d)-LANL2DZ energy in DCE solvent = -1857.25676700

Cartesian coordinates:

|    |             |             |             |
|----|-------------|-------------|-------------|
| C  | -0.38156200 | -2.40778200 | -1.08108600 |
| C  | -1.58203900 | -2.12166300 | -0.83468300 |
| N  | -2.78624900 | -1.73280400 | -0.50393300 |
| S  | -3.15281900 | -1.64686200 | 1.23132900  |
| O  | -1.88577200 | -1.78847300 | 1.91860700  |
| O  | -3.99579100 | -0.47817300 | 1.38216600  |
| Au | 0.23767300  | -0.40845700 | -0.45272300 |
| C  | 0.97670800  | 1.38326200  | 0.16950500  |
| N  | 0.32671700  | 2.55983200  | 0.26771000  |

|   |             |             |             |
|---|-------------|-------------|-------------|
| C | 2.36792700  | 2.93589400  | 1.00024800  |
| C | 1.17001900  | 3.53317200  | 0.78108500  |
| H | 3.30216000  | 3.31679200  | 1.39175300  |
| H | 0.83170300  | 4.54866700  | 0.94088500  |
| N | 2.22708400  | 1.61157200  | 0.61619600  |
| C | -3.56900300 | -0.84892800 | -1.39358600 |
| H | -3.40335900 | -1.18044600 | -2.42148200 |
| H | -4.63103900 | -0.93329900 | -1.14784100 |
| H | -3.24646600 | 0.19419600  | -1.26961900 |
| C | 0.58847700  | -3.39587800 | -1.52693200 |
| C | 0.15451600  | -4.53721200 | -2.07825900 |
| H | -0.90468600 | -4.75124200 | -2.20419100 |
| H | 0.85671200  | -5.29037700 | -2.43112400 |
| C | 2.04081100  | -3.06726500 | -1.34681600 |
| H | 2.31887200  | -2.16462900 | -1.91198600 |
| H | 2.27769000  | -2.86486200 | -0.29139600 |
| H | 2.67666700  | -3.89170800 | -1.68757800 |
| C | 3.22887900  | 0.58158400  | 0.69945500  |
| C | 4.09065200  | 0.40591500  | -0.38832100 |
| C | 3.25332300  | -0.22447700 | 1.84287900  |
| C | 5.02754400  | -0.62313500 | -0.30094700 |
| C | 4.20874600  | -1.24068000 | 1.88453400  |
| C | 5.08697600  | -1.43690500 | 0.82495200  |
| H | 5.71819600  | -0.78174300 | -1.12832800 |
| H | 4.26109900  | -1.88046400 | 2.76466600  |
| H | 5.82941500  | -2.23087200 | 0.87893000  |
| C | -1.05709600 | 2.73426000  | -0.08729400 |
| C | -2.03020000 | 2.39409600  | 0.85875800  |
| C | -1.35638700 | 3.20109500  | -1.37193400 |
| C | -3.36580700 | 2.54750700  | 0.48165800  |
| C | -2.70399100 | 3.34126600  | -1.70174700 |
| C | -3.69814600 | 3.02058300  | -0.78266300 |
| H | -4.14667300 | 2.28716200  | 1.19424800  |
| H | -2.97062000 | 3.71145400  | -2.69101500 |
| H | -4.74492900 | 3.14517100  | -1.05442800 |
| C | -4.11841500 | -3.12337200 | 1.43629700  |
| H | -4.43309000 | -3.16125700 | 2.48438400  |
| H | -4.99200700 | -3.06497300 | 0.77991300  |
| H | -3.49165500 | -3.98621600 | 1.19338700  |
| C | -1.66003800 | 1.87245800  | 2.21465900  |
| H | -0.87519700 | 2.47680600  | 2.68980700  |
| H | -2.53143000 | 1.86503700  | 2.87793100  |
| H | -1.28462900 | 0.83846500  | 2.16256000  |
| C | -0.27215200 | 3.52584700  | -2.35454000 |
| H | 0.37738600  | 4.33761000  | -1.99929200 |
| H | 0.37659900  | 2.65768900  | -2.54149600 |
| H | -0.69618100 | 3.83913600  | -3.31439100 |
| C | 3.98852000  | 1.26654800  | -1.61122900 |
| H | 4.03413700  | 2.33755900  | -1.37265000 |
| H | 4.80040000  | 1.04660100  | -2.31253500 |
| H | 3.03775900  | 1.09875100  | -2.13968600 |
| C | 2.27455900  | -0.03040900 | 2.96210200  |
| H | 2.15806600  | 1.02640500  | 3.23718500  |
| H | 1.27451800  | -0.40209200 | 2.68826000  |
| H | 2.59226900  | -0.57717500 | 3.85640800  |

## INT2a

|                                              |                             |
|----------------------------------------------|-----------------------------|
| Zero-point correction=                       | 0.635806 (Hartree/Particle) |
| Thermal correction to Energy=                | 0.679192                    |
| Thermal correction to Enthalpy=              | 0.680136                    |
| Thermal correction to Gibbs Free Energy=     | 0.555333                    |
| Sum of electronic and zero-point Energies=   | -2180.337460                |
| Sum of electronic and thermal Energies=      | -2180.294075                |
| Sum of electronic and thermal Enthalpies=    | -2180.293131                |
| Sum of electronic and thermal Free Energies= | -2180.417933                |

M06/6-311++G(d,p)-SDD/SMD//M06/6-31G(d)-LANL2DZ energy in DCE solvent = -2181.83643150

Cartesian coordinates:

|    |             |             |             |
|----|-------------|-------------|-------------|
| C  | -1.38611400 | -1.00974800 | -0.51896400 |
| C  | -2.45363600 | -0.22583400 | -0.26769200 |
| N  | -2.47530400 | 1.17413200  | -0.06630800 |
| S  | -2.46816100 | 1.69364900  | 1.55166300  |
| O  | -2.80723600 | 0.52562400  | 2.35408700  |
| O  | -1.26749500 | 2.47034900  | 1.81972900  |
| Au | 0.55289300  | -0.28749100 | -0.29057800 |
| C  | 2.51363000  | 0.32820900  | -0.06041800 |
| N  | 3.02636700  | 1.57573200  | -0.12548000 |
| C  | 4.74334700  | 0.26113200  | 0.27180000  |
| C  | 4.39787000  | 1.55709400  | 0.07776100  |
| H  | 5.69841700  | -0.20976200 | 0.46511400  |
| H  | 4.98480100  | 2.46629200  | 0.06655200  |
| N  | 3.57287600  | -0.47631400 | 0.18130300  |
| N  | -3.78104600 | -0.78100900 | -0.18696900 |
| C  | -5.65265200 | -1.91385700 | 0.11102800  |
| C  | -5.82863400 | -1.03102900 | -0.91543200 |
| C  | -1.78166400 | 2.04890600  | -1.01540100 |
| H  | -2.01198200 | 1.69284600  | -2.02419100 |
| H  | -2.15456200 | 3.07526000  | -0.91261600 |
| H  | -0.69111700 | 2.05936300  | -0.86911000 |
| C  | -1.52017900 | -2.42143200 | -0.91297400 |
| C  | -2.34189200 | -2.81532900 | -1.89880700 |
| H  | -2.95682600 | -2.10823100 | -2.45562100 |
| H  | -2.36426600 | -3.85158700 | -2.23378000 |
| C  | -0.59571300 | -3.39211300 | -0.22761200 |
| H  | 0.44195500  | -3.25399100 | -0.57025700 |
| H  | -0.57730200 | -3.23996300 | 0.86177900  |
| H  | -0.88533200 | -4.42985100 | -0.43369300 |
| C  | -4.33312200 | -1.72679600 | 0.56328200  |
| C  | -3.60001700 | -2.43292400 | 1.63213000  |
| H  | -2.85978100 | -1.77315400 | 2.09794500  |
| H  | -4.29982400 | -2.79825200 | 2.38971000  |
| H  | -3.08182500 | -3.29818000 | 1.19510900  |
| O  | -4.70002100 | -0.33166900 | -1.11742900 |
| C  | -6.96994700 | -0.70383600 | -1.79114300 |
| H  | -7.82942200 | -1.33098300 | -1.53949000 |
| H  | -7.25653600 | 0.34886200  | -1.67891200 |
| H  | -6.71106400 | -0.86619400 | -2.84437300 |
| H  | -6.37914700 | -2.60734300 | 0.51338900  |
| C  | 3.46103800  | -1.89963900 | 0.34467400  |
| C  | 3.57804800  | -2.71176300 | -0.78776100 |
| C  | 3.20327800  | -2.39838500 | 1.62564300  |
| C  | 3.43690500  | -4.08771100 | -0.60594000 |
| C  | 3.07039200  | -3.78035500 | 1.75971400  |
| C  | 3.18673600  | -4.61670900 | 0.65534900  |
| H  | 3.52924900  | -4.74724200 | -1.46819300 |
| H  | 2.87606400  | -4.19965700 | 2.74632500  |
| H  | 3.08604700  | -5.69340200 | 0.77939800  |
| C  | 2.23382700  | 2.75631900  | -0.33650400 |
| C  | 1.65950500  | 3.37190600  | 0.77922200  |
| C  | 2.06529100  | 3.21875600  | -1.64647800 |
| C  | 0.88952100  | 4.51339500  | 0.55146800  |
| C  | 1.29162700  | 4.36465900  | -1.82476500 |
| C  | 0.71241300  | 5.00732500  | -0.73462000 |
| H  | 0.42300000  | 5.00924100  | 1.40159600  |
| H  | 1.15007600  | 4.75640600  | -2.83164200 |
| H  | 0.11883200  | 5.90653200  | -0.89174700 |
| C  | -3.85924000 | 2.80512600  | 1.58486100  |
| H  | -3.93147900 | 3.20454100  | 2.60132700  |
| H  | -3.69490400 | 3.62223100  | 0.87630800  |
| H  | -4.76018200 | 2.23991700  | 1.32865800  |
| C  | 1.83661100  | 2.81030400  | 2.15618500  |
| H  | 2.88292100  | 2.55248500  | 2.36995500  |

|   |            |             |             |
|---|------------|-------------|-------------|
| H | 1.49650900 | 3.52419400  | 2.91396400  |
| H | 1.23599400 | 1.89809800  | 2.28211700  |
| C | 2.67389200 | 2.49491400  | -2.80934700 |
| H | 3.76119500 | 2.37935200  | -2.70322200 |
| H | 2.25603000 | 1.48230200  | -2.91229600 |
| H | 2.48553400 | 3.03105600  | -3.74580100 |
| C | 3.81563100 | -2.12436000 | -2.14594700 |
| H | 4.68168800 | -1.44901500 | -2.16061500 |
| H | 3.99231800 | -2.91164500 | -2.88671000 |
| H | 2.94827800 | -1.53719000 | -2.48294700 |
| C | 3.05111400 | -1.47920800 | 2.79972300  |
| H | 3.90992400 | -0.80303700 | 2.91040600  |
| H | 2.15866600 | -0.84383800 | 2.69664700  |
| H | 2.95066600 | -2.04732900 | 3.73081800  |

### INT3a

Zero-point correction= 0.633970 (Hartree/Particle)  
 Thermal correction to Energy= 0.678066  
 Thermal correction to Enthalpy= 0.679011  
 Thermal correction to Gibbs Free Energy= 0.554987  
 Sum of electronic and zero-point Energies= -2180.344309  
 Sum of electronic and thermal Energies= -2180.300212  
 Sum of electronic and thermal Enthalpies= -2180.299268  
 Sum of electronic and thermal Free Energies= -2180.423291  
 M06/6-311++G(d,p)-SDD/SMD//M06/6-31G(d)-LANL2DZ energy in DCE solvent = -2181.84446405

### Cartesian coordinates:

|    |             |             |             |
|----|-------------|-------------|-------------|
| C  | -3.84911000 | -2.88719600 | 0.87022000  |
| C  | -5.12566400 | -2.55222300 | 0.22599100  |
| C  | -2.82165200 | -2.00706000 | 1.06457400  |
| O  | -5.30362700 | -1.51803000 | -0.41169100 |
| H  | -3.78194700 | -3.85099300 | 1.37506300  |
| C  | -1.63333300 | -2.35588500 | 1.90451700  |
| H  | -1.42972600 | -1.55002500 | 2.62183600  |
| H  | -1.77012200 | -3.29844300 | 2.44339100  |
| H  | -0.73883100 | -2.44219400 | 1.26265600  |
| C  | -6.23000500 | -3.55655500 | 0.40998800  |
| H  | -7.10559800 | -3.26301000 | -0.17480000 |
| H  | -5.90156200 | -4.56124000 | 0.11156100  |
| H  | -6.50936400 | -3.62059700 | 1.47081700  |
| C  | -1.20327800 | -0.87182700 | -1.07410000 |
| C  | -2.28929000 | -0.15261200 | -0.40449700 |
| Au | 0.64373900  | -0.20791300 | -0.47350900 |
| N  | -2.85707200 | -0.73687000 | 0.58596600  |
| C  | 3.99580900  | 1.87192100  | 1.10796600  |
| C  | 4.50503300  | 0.61376300  | 1.14477000  |
| H  | 4.40825400  | 2.82350900  | 1.41681500  |
| H  | 5.45650300  | 0.23209200  | 1.49168600  |
| N  | 2.72800700  | 1.77069000  | 0.56325000  |
| N  | 3.53409200  | -0.22171300 | 0.61763100  |
| C  | 2.44309000  | 0.48713000  | 0.26171100  |
| C  | -1.44607700 | -2.06818700 | -1.79202100 |
| N  | -2.54512400 | 1.15578300  | -0.72336000 |
| C  | -1.87195600 | 1.80278600  | -1.85194600 |
| H  | -0.92358300 | 2.27137100  | -1.55273200 |
| H  | -1.68310400 | 1.04905000  | -2.62446900 |
| H  | -2.52951700 | 2.57031900  | -2.26629100 |
| S  | -3.28489200 | 2.20546800  | 0.45349100  |
| O  | -2.65019800 | 1.96703500  | 1.73689700  |
| O  | -3.23547700 | 3.51647100  | -0.16718800 |
| C  | -2.73985300 | -2.46630400 | -2.00143200 |
| H  | -2.95827300 | -3.40241900 | -2.51680200 |
| H  | -3.59590300 | -1.85954100 | -1.70238300 |
| C  | -0.27801600 | -2.89662700 | -2.25062300 |
| H  | 0.38863000  | -2.30965900 | -2.89623000 |
| H  | 0.32434400  | -3.23156300 | -1.39358500 |

|   |             |             |             |
|---|-------------|-------------|-------------|
| H | -0.60106600 | -3.78137400 | -2.81029600 |
| C | 3.61514200  | -1.65136700 | 0.48463800  |
| C | 4.06265300  | -2.18285000 | -0.72856500 |
| C | 3.19179300  | -2.43787300 | 1.56153800  |
| C | 4.09611800  | -3.57288500 | -0.84320200 |
| C | 3.23808800  | -3.82204600 | 1.39913100  |
| C | 3.68870000  | -4.38401200 | 0.20954000  |
| H | 4.45049200  | -4.01843400 | -1.77202400 |
| H | 2.92255200  | -4.46241400 | 2.22209400  |
| H | 3.72717500  | -5.46655900 | 0.10384300  |
| C | 1.79651600  | 2.84349100  | 0.32887800  |
| C | 1.94526800  | 3.59929100  | -0.84007400 |
| C | 0.74749900  | 3.02513800  | 1.23711600  |
| C | 0.99018100  | 4.58420200  | -1.08986900 |
| C | -0.18698500 | 4.01854400  | 0.94021600  |
| C | -0.06904900 | 4.78726900  | -0.21104400 |
| H | 1.07898200  | 5.19008600  | -1.99102900 |
| H | -1.02713900 | 4.17029800  | 1.61604200  |
| H | -0.81955100 | 5.54475100  | -0.42808100 |
| C | -4.96239000 | 1.62999600  | 0.47371600  |
| H | -4.97752100 | 0.55297400  | 0.66452700  |
| H | -5.47106700 | 2.18522800  | 1.26870800  |
| H | -5.40740300 | 1.85675900  | -0.49915600 |
| C | 0.58791200  | 2.16999200  | 2.45845200  |
| H | 1.55144600  | 1.87413500  | 2.89413900  |
| H | 0.00905600  | 2.69684200  | 3.22457900  |
| H | 0.02838800  | 1.24947500  | 2.22367500  |
| C | 3.07084300  | 3.34160400  | -1.79659200 |
| H | 4.04885900  | 3.59392100  | -1.36368000 |
| H | 3.11780300  | 2.28295400  | -2.09312500 |
| H | 2.95292500  | 3.93960300  | -2.70654600 |
| C | 2.69651500  | -1.81505200 | 2.83196700  |
| H | 3.46743000  | -1.20186200 | 3.31880500  |
| H | 1.83617600  | -1.15323600 | 2.65052000  |
| H | 2.38487300  | -2.58297600 | 3.54820300  |
| C | 4.46454300  | -1.29660100 | -1.86864300 |
| H | 3.59175000  | -0.78997200 | -2.30799700 |
| H | 5.16429600  | -0.50959100 | -1.55692200 |
| H | 4.94506200  | -1.87644000 | -2.66391700 |

#### INT4a

Zero-point correction= 0.634700 (Hartree/Particle)

Thermal correction to Energy= 0.678386

Thermal correction to Enthalpy= 0.679330

Thermal correction to Gibbs Free Energy= 0.556527

Sum of electronic and zero-point Energies= -2180.339594

Sum of electronic and thermal Energies= -2180.295908

Sum of electronic and thermal Enthalpies= -2180.294964

Sum of electronic and thermal Free Energies= -2180.417767

M06/6-311++G(d,p)-SDD/SMD//M06/6-31G(d)-LANL2DZ energy in DCE solvent = -2181.83661638

#### Cartesian coordinates:

|   |             |             |             |
|---|-------------|-------------|-------------|
| C | -5.39991200 | -1.28426500 | 0.46924200  |
| C | -5.74885900 | -0.39538100 | -0.64366600 |
| C | -4.19531900 | -1.87230300 | 0.68281900  |
| N | -3.13153900 | -1.76636900 | -0.19615000 |
| O | -4.97101200 | -0.07824800 | -1.53886700 |
| H | -6.20363600 | -1.55096200 | 1.15672000  |
| C | -7.16453700 | 0.11456900  | -0.63867400 |
| H | -7.86596900 | -0.72208400 | -0.76383500 |
| H | -7.41036600 | 0.58749500  | 0.32162400  |
| H | -7.30963500 | 0.82945900  | -1.45272400 |
| C | -3.95712000 | -2.82890200 | 1.80702400  |
| H | -3.70828500 | -3.81920600 | 1.40424900  |
| H | -3.09953100 | -2.50014300 | 2.40873700  |



|    |             |             |             |
|----|-------------|-------------|-------------|
| H  | -4.84143900 | -2.91638300 | 2.44622600  |
| C  | -1.22083000 | -0.90328400 | -1.24151300 |
| C  | -2.39559500 | -0.74102100 | -0.37435800 |
| N  | -2.55439300 | 0.51350700  | 0.27006500  |
| S  | -2.03367000 | 0.65656300  | 1.88061500  |
| O  | -1.61760700 | -0.67136200 | 2.30610800  |
| O  | -1.12305500 | 1.78735600  | 1.95463600  |
| Au | 0.57881100  | -0.24779900 | -0.51284400 |
| C  | 2.42440100  | 0.44862300  | 0.12558100  |
| N  | 2.83206500  | 1.73321000  | 0.18653900  |
| C  | 4.56208400  | 0.53304700  | 0.81718600  |
| C  | 4.14769600  | 1.80816800  | 0.61300700  |
| H  | 5.50769300  | 0.12644500  | 1.15129500  |
| H  | 4.65430000  | 2.75743000  | 0.72801900  |
| N  | 3.48752400  | -0.28579200 | 0.50934200  |
| C  | -2.42577200 | 1.71374600  | -0.56805300 |
| H  | -3.02508600 | 1.55038900  | -1.46971400 |
| H  | -2.85178000 | 2.57029400  | -0.03501600 |
| H  | -1.38234400 | 1.95383100  | -0.82137700 |
| C  | -1.35686300 | -1.50338000 | -2.52080900 |
| C  | -2.58156700 | -1.44772900 | -3.12594800 |
| H  | -3.46511500 | -1.04634800 | -2.62622000 |
| H  | -2.69392700 | -1.76058600 | -4.16521900 |
| C  | -0.14062700 | -2.02604000 | -3.23162200 |
| H  | 0.54217400  | -1.20685800 | -3.49768400 |
| H  | 0.42027000  | -2.71675100 | -2.58822500 |
| H  | -0.41216500 | -2.55611300 | -4.15134600 |
| C  | 3.46909400  | -1.72119500 | 0.58812800  |
| C  | 3.89440200  | -2.44783900 | -0.52892500 |
| C  | 2.99069600  | -2.31423900 | 1.76024400  |
| C  | 3.85181800  | -3.83829200 | -0.44006700 |
| C  | 2.97019600  | -3.70866900 | 1.80391300  |
| C  | 3.39821800  | -4.46198900 | 0.71742100  |
| H  | 4.18269200  | -4.43428700 | -1.28990900 |
| H  | 2.61118400  | -4.20340500 | 2.70555300  |
| H  | 3.37827300  | -5.54876200 | 0.77252000  |
| C  | 1.97066200  | 2.84255200  | -0.12036800 |
| C  | 1.33760900  | 3.49257900  | 0.94305500  |
| C  | 1.77234900  | 3.18163800  | -1.46348800 |
| C  | 0.45787900  | 4.52671700  | 0.62390400  |
| C  | 0.88786900  | 4.22577700  | -1.73279700 |
| C  | 0.23496300  | 4.88930800  | -0.69894600 |
| H  | -0.05894700 | 5.04502500  | 1.43069000  |
| H  | 0.71874700  | 4.52268200  | -2.76741600 |
| H  | -0.45005000 | 5.70363700  | -0.92857300 |
| C  | -3.53134400 | 1.09829200  | 2.73243800  |
| H  | -3.27746700 | 1.23668500  | 3.78814000  |
| H  | -3.91336200 | 2.03395200  | 2.31242900  |
| H  | -4.25762300 | 0.29009500  | 2.60371500  |
| C  | 1.58935700  | 3.08638000  | 2.36253700  |
| H  | 2.59998700  | 3.36580300  | 2.69263700  |
| H  | 0.87194300  | 3.56732300  | 3.03528900  |
| H  | 1.48428700  | 2.00061000  | 2.49388400  |
| C  | 2.46623100  | 2.44620800  | -2.57140700 |
| H  | 3.52828400  | 2.27101200  | -2.35270000 |
| H  | 2.01176700  | 1.45782900  | -2.74625200 |
| H  | 2.40339300  | 3.00730500  | -3.51030700 |
| C  | 4.35552400  | -1.75372200 | -1.77527200 |
| H  | 5.22684800  | -1.10971600 | -1.59245100 |
| H  | 4.63622800  | -2.47952300 | -2.54606700 |
| H  | 3.56727000  | -1.10736700 | -2.19158300 |
| C  | 2.48873300  | -1.48933800 | 2.90713700  |
| H  | 3.16321500  | -0.65648600 | 3.14780800  |
| H  | 1.50265800  | -1.05255300 | 2.68408300  |
| H  | 2.37733700  | -2.10259900 | 3.80790000  |

Zero-point correction= 0.636519 (Hartree/Particle)  
 Thermal correction to Energy= 0.679959  
 Thermal correction to Enthalpy= 0.680903  
 Thermal correction to Gibbs Free Energy= 0.556258  
 Sum of electronic and zero-point Energies= -2180.396208  
 Sum of electronic and thermal Energies= -2180.352768  
 Sum of electronic and thermal Enthalpies= -2180.351824  
 Sum of electronic and thermal Free Energies= -2180.476469  
 M06/6-311++G(d,p)-SDD/SMD//M06/6-31G(d)-LANL2DZ energy in DCE solvent = -2181.89752436

Cartesian coordinates:

|    |             |             |             |
|----|-------------|-------------|-------------|
| C  | -3.76178700 | -2.63585100 | -0.02096600 |
| C  | -5.29235600 | -2.63661100 | -0.16379200 |
| C  | -3.39533900 | -1.70044100 | 1.10686600  |
| O  | -5.89676100 | -1.59111500 | -0.04913600 |
| H  | -3.41607700 | -3.64414700 | 0.26613700  |
| C  | -3.80244400 | -2.12471900 | 2.47550300  |
| H  | -3.42487600 | -1.42518100 | 3.22564200  |
| H  | -4.89874000 | -2.16458400 | 2.55054400  |
| H  | -3.43028400 | -3.13561700 | 2.69088000  |
| C  | -5.94514400 | -3.94504800 | -0.47653200 |
| H  | -6.99109700 | -3.79367300 | -0.75562700 |
| H  | -5.41161900 | -4.47805000 | -1.27477100 |
| H  | -5.89985300 | -4.59014900 | 0.41342500  |
| C  | -1.18929800 | -0.96340200 | -0.77096900 |
| C  | -2.18603000 | -0.11661900 | -0.14039800 |
| Au | 0.75217500  | -0.33078100 | -0.36290500 |
| N  | -2.81883300 | -0.56504900 | 0.96833000  |
| C  | 4.05066300  | 2.02239600  | 0.91068200  |
| C  | 4.66605900  | 0.81638000  | 0.96167600  |
| H  | 4.39559900  | 3.01819200  | 1.15642900  |
| H  | 5.66532400  | 0.52826700  | 1.26124800  |
| N  | 2.76465100  | 1.79019200  | 0.44921100  |
| N  | 3.73956500  | -0.12089400 | 0.52893000  |
| C  | 2.56937600  | 0.47213500  | 0.21152500  |
| C  | -1.68523700 | -2.06574800 | -1.36840700 |
| N  | -2.42668800 | 1.13379400  | -0.55241600 |
| C  | -1.72633200 | 1.68974400  | -1.71824300 |
| H  | -0.73413600 | 2.06206200  | -1.42551200 |
| H  | -1.62179600 | 0.90561700  | -2.47189800 |
| H  | -2.31431400 | 2.51886000  | -2.11595600 |
| S  | -3.39148600 | 2.28042700  | 0.42207900  |
| O  | -2.91164300 | 2.20918900  | 1.78419500  |
| O  | -3.32854200 | 3.51038600  | -0.33975900 |
| C  | -3.18740100 | -2.26262100 | -1.40522900 |
| H  | -3.46912600 | -3.04948400 | -2.12018800 |
| H  | -3.69661500 | -1.34543900 | -1.74603200 |
| C  | -0.84647400 | -3.13474300 | -1.98417100 |
| H  | 0.22173600  | -2.95150100 | -1.81949700 |
| H  | -1.10009100 | -4.12032300 | -1.56296500 |
| H  | -1.02369300 | -3.20740900 | -3.06750900 |
| C  | 3.97894100  | -1.53458800 | 0.43089200  |
| C  | 4.39904400  | -2.05270000 | -0.79764000 |
| C  | 3.76807100  | -2.32161600 | 1.56718500  |
| C  | 4.62438900  | -3.42735800 | -0.86788800 |
| C  | 4.00586200  | -3.69051300 | 1.44997000  |
| C  | 4.43146800  | -4.23761400 | 0.24488000  |
| H  | 4.95961100  | -3.86099300 | -1.80940800 |
| H  | 3.85581200  | -4.33000900 | 2.31911300  |
| H  | 4.61818000  | -5.30747200 | 0.17309200  |
| C  | 1.77263500  | 2.79860500  | 0.18967900  |
| C  | 1.86467600  | 3.50732900  | -1.01480600 |
| C  | 0.74652900  | 3.00001300  | 1.12026600  |
| C  | 0.88391100  | 4.46455300  | -1.27568300 |
| C  | -0.21350600 | 3.96648800  | 0.81412100  |
| C  | -0.14613600 | 4.69200100  | -0.36951600 |

|   |             |             |             |
|---|-------------|-------------|-------------|
| H | 0.93232400  | 5.03119100  | -2.20504400 |
| H | -1.02649000 | 4.14172600  | 1.51783000  |
| H | -0.91385400 | 5.43138400  | -0.58962600 |
| C | -5.02711700 | 1.60512300  | 0.26762800  |
| H | -5.07257600 | 0.57984200  | 0.64435000  |
| H | -5.68010600 | 2.26244500  | 0.85208400  |
| H | -5.30648600 | 1.64487700  | -0.78963400 |
| C | 0.63836300  | 2.19237100  | 2.37856200  |
| H | 1.61440100  | 2.02323100  | 2.85252300  |
| H | -0.01815400 | 2.68905500  | 3.10112900  |
| H | 0.20052100  | 1.20130200  | 2.17469600  |
| C | 2.96111600  | 3.22711500  | -1.99831700 |
| H | 3.94651500  | 3.52854700  | -1.61688500 |
| H | 3.02669900  | 2.15474300  | -2.23502600 |
| H | 2.79277900  | 3.76984100  | -2.93465900 |
| C | 3.29308300  | -1.71578300 | 2.85328000  |
| H | 3.99855400  | -0.96934000 | 3.24373800  |
| H | 2.32818700  | -1.20347300 | 2.72428200  |
| H | 3.16520400  | -2.48433400 | 3.62315300  |
| C | 4.58075700  | -1.16867500 | -1.99453300 |
| H | 3.61366300  | -0.80374600 | -2.37183400 |
| H | 5.18821700  | -0.28208900 | -1.76635900 |
| H | 5.07126500  | -1.71088000 | -2.81016200 |

#### INT6a

Zero-point correction= 0.697674 (Hartree/Particle)  
 Thermal correction to Energy= 0.754267  
 Thermal correction to Enthalpy= 0.755211  
 Thermal correction to Gibbs Free Energy= 0.607877  
 Sum of electronic and zero-point Energies= -4007.260670  
 Sum of electronic and thermal Energies= -4007.204077  
 Sum of electronic and thermal Enthalpies= -4007.203133  
 Sum of electronic and thermal Free Energies= -4007.350467  
 M06/6-311++G(d,p)-SDD/SMD//M06/6-31G(d)-LANL2DZ energy in DCE solvent = -4009.12513576

#### Cartesian coordinates:

|   |             |             |             |
|---|-------------|-------------|-------------|
| H | -3.81164100 | 1.47905700  | 0.46489800  |
| N | -3.69479900 | 0.48103100  | 0.79957200  |
| S | -4.42636400 | -0.67715600 | -0.16324300 |
| O | -4.46388600 | -0.15673100 | -1.51294200 |
| O | -3.91435400 | -1.98821500 | 0.15444400  |
| S | -2.98350200 | 0.22657300  | 2.29762200  |
| O | -3.03759100 | 1.49056600  | 2.99595300  |
| O | -3.43119200 | -1.02130500 | 2.86736500  |
| C | -1.22927000 | -0.03788600 | 1.77112400  |
| C | -6.16334900 | -0.58476000 | 0.45745100  |
| F | -0.54932100 | -0.47293500 | 2.81820300  |
| F | -1.21265900 | -0.94483500 | 0.81261400  |
| F | -0.71718900 | 1.09456700  | 1.34668400  |
| F | -6.89013100 | -1.43681400 | -0.24153900 |
| F | -6.61186200 | 0.64184900  | 0.28708200  |
| F | -6.19326400 | -0.90532200 | 1.73463900  |
| C | -2.10433900 | 2.76796900  | -1.59344800 |
| C | -3.55967100 | 2.73507700  | -1.60871400 |
| C | -1.39381900 | 3.28134900  | -0.52159000 |
| O | -4.24951500 | 2.71894300  | -0.57498200 |
| C | -2.02442400 | 3.92412400  | 0.67992000  |
| H | -1.34208300 | 4.69198400  | 1.06204500  |
| H | -3.00686700 | 4.35680000  | 0.47327600  |
| H | -2.16328600 | 3.19796100  | 1.49252500  |
| C | -4.27728500 | 2.70543000  | -2.93187300 |
| H | -5.32957500 | 2.95110900  | -2.76199800 |
| H | -3.84088300 | 3.39112000  | -3.66827400 |
| H | -4.23298600 | 1.68867700  | -3.34754900 |
| C | 0.51061600  | 1.20428400  | -1.52027400 |

|    |             |             |             |
|----|-------------|-------------|-------------|
| C  | 0.81371800  | 2.53461200  | -1.02350300 |
| Au | 1.53761300  | -0.42679400 | -0.72577100 |
| N  | -0.03589400 | 3.39506600  | -0.52467900 |
| C  | 3.94533100  | -3.34387400 | 1.27748200  |
| C  | 2.90979700  | -4.14163900 | 0.92032100  |
| H  | 4.85081200  | -3.54417400 | 1.83492300  |
| H  | 2.71156100  | -5.19008700 | 1.09987200  |
| N  | 3.66104500  | -2.08185700 | 0.77944300  |
| N  | 2.02335400  | -3.34438200 | 0.21247100  |
| C  | 2.47726700  | -2.07186200 | 0.12456100  |
| C  | -0.57527100 | 1.07430400  | -2.32085500 |
| N  | 2.16310200  | 2.92960100  | -0.92427500 |
| C  | 3.20826700  | 2.27994100  | -1.71324300 |
| H  | 3.69792600  | 1.45404400  | -1.17641400 |
| H  | 2.73864100  | 1.88530600  | -2.61819400 |
| H  | 3.96645400  | 3.01970000  | -1.98602900 |
| S  | 2.69993700  | 3.75392200  | 0.46892000  |
| O  | 2.15109600  | 3.11739600  | 1.65795100  |
| O  | 4.14512600  | 3.86517600  | 0.30921400  |
| C  | -1.31047600 | 2.31104000  | -2.78765800 |
| H  | -1.95459700 | 2.08322700  | -3.64533000 |
| H  | -0.60150900 | 3.09235200  | -3.10593000 |
| C  | -1.17615000 | -0.23233100 | -2.72940000 |
| H  | -1.09862400 | -0.37910300 | -3.81851400 |
| H  | -0.69805200 | -1.08639500 | -2.23017200 |
| H  | -2.25095900 | -0.25180300 | -2.48983800 |
| C  | 0.77069300  | -3.76732700 | -0.34657800 |
| C  | 0.71318600  | -4.03180000 | -1.71927800 |
| C  | -0.34488700 | -3.83744300 | 0.49299400  |
| C  | -0.52573700 | -4.38197900 | -2.25390500 |
| C  | -1.56615200 | -4.17837500 | -0.08731800 |
| C  | -1.65667000 | -4.44462700 | -1.44737000 |
| H  | -0.60038600 | -4.59084700 | -3.32103600 |
| H  | -2.45923100 | -4.20004700 | 0.53525200  |
| H  | -2.62212300 | -4.69482600 | -1.88356700 |
| C  | 4.50065400  | -0.92086900 | 0.87592800  |
| C  | 5.55512300  | -0.80195700 | -0.03534900 |
| C  | 4.17852400  | 0.06861800  | 1.81029700  |
| C  | 6.32592200  | 0.35834500  | 0.02074600  |
| C  | 4.97044700  | 1.21650500  | 1.82233900  |
| C  | 6.03146100  | 1.36080600  | 0.93783000  |
| H  | 7.15006300  | 0.48097000  | -0.68194400 |
| H  | 4.71883800  | 2.02290600  | 2.50934300  |
| H  | 6.61351900  | 2.27993900  | 0.94702900  |
| C  | 2.04272900  | 5.40217700  | 0.32480300  |
| H  | 0.95369000  | 5.35000000  | 0.35709900  |
| H  | 2.45689800  | 5.96599300  | 1.16731300  |
| H  | 2.39134600  | 5.82179300  | -0.62316900 |
| C  | 2.99005800  | -0.05485900 | 2.71323400  |
| H  | 2.85831400  | -1.07640500 | 3.09609600  |
| H  | 3.07437100  | 0.63012500  | 3.56379300  |
| H  | 2.07072800  | 0.21702600  | 2.17222500  |
| C  | 5.80605500  | -1.86060800 | -1.06719300 |
| H  | 6.09669900  | -2.82180000 | -0.62036100 |
| H  | 4.90322300  | -2.05070600 | -1.66773900 |
| H  | 6.60735300  | -1.55667200 | -1.75006100 |
| C  | -0.24657100 | -3.54124100 | 1.95894300  |
| H  | 0.08774700  | -4.42191400 | 2.52678500  |
| H  | 0.46752800  | -2.73331700 | 2.16727700  |
| H  | -1.22351500 | -3.24108600 | 2.35878800  |
| C  | 1.92494600  | -3.89852400 | -2.59152600 |
| H  | 2.15285200  | -2.83914200 | -2.78708000 |
| H  | 2.82049200  | -4.33690800 | -2.12974600 |
| H  | 1.76508600  | -4.38872300 | -3.55875000 |

INT7a

Zero-point correction= 0.696763 (Hartree/Particle)  
 Thermal correction to Energy= 0.754081  
 Thermal correction to Enthalpy= 0.755025  
 Thermal correction to Gibbs Free Energy= 0.602527  
 Sum of electronic and zero-point Energies= -4007.266531  
 Sum of electronic and thermal Energies= -4007.209213  
 Sum of electronic and thermal Enthalpies= -4007.208269  
 Sum of electronic and thermal Free Energies= -4007.360768  
 M06/6-311++G(d,p)-SDD/SMD//M06/6-31G(d)-LANL2DZ energy in DCE solvent = -4009.15671786

Cartesian coordinates:

|    |             |             |             |
|----|-------------|-------------|-------------|
| H  | -1.60213500 | -0.06471200 | 0.59600300  |
| N  | -1.54252400 | 1.70338100  | 1.64766400  |
| S  | -0.61916400 | 2.94990900  | 1.27553400  |
| O  | 0.18637400  | 2.55853100  | 0.11098300  |
| O  | -1.20333800 | 4.27822100  | 1.31051700  |
| S  | -2.93122300 | 1.74705000  | 2.48058800  |
| O  | -3.10844000 | 0.42527100  | 3.06364300  |
| O  | -3.16759500 | 2.94620500  | 3.26222600  |
| C  | -4.14400400 | 1.79846500  | 1.09052800  |
| C  | 0.60466600  | 2.92053100  | 2.64962500  |
| F  | -5.37107700 | 1.81516100  | 1.57709500  |
| F  | -3.94468100 | 2.87654000  | 0.34771600  |
| F  | -3.99719400 | 0.72008200  | 0.31890300  |
| F  | 1.49982200  | 3.88582200  | 2.47532100  |
| F  | 1.25193500  | 1.74864600  | 2.65271500  |
| F  | 0.00891300  | 3.07906800  | 3.81479500  |
| C  | -1.29774700 | -4.02282000 | 0.51876700  |
| C  | -1.35198200 | -5.14983200 | 1.46789900  |
| C  | -2.36242200 | -3.68217200 | -0.28216900 |
| O  | -2.31099600 | -5.90275000 | 1.54816500  |
| C  | -3.67928300 | -4.39836300 | -0.29721700 |
| H  | -4.36303300 | -3.87473300 | -0.97370400 |
| H  | -3.56434400 | -5.44314900 | -0.61047600 |
| H  | -4.11048100 | -4.44252800 | 0.70864400  |
| C  | -0.14761100 | -5.38624100 | 2.35896500  |
| H  | -0.38930100 | -6.19885100 | 3.04946900  |
| H  | 0.73043200  | -5.67663900 | 1.76349400  |
| H  | 0.13568300  | -4.49316500 | 2.93331300  |
| C  | -1.19551700 | -0.97271600 | 0.13745900  |
| C  | -1.85079700 | -1.47685400 | -1.08218000 |
| Au | 0.94636200  | -0.23835400 | -0.22974800 |
| N  | -2.31132900 | -2.67718500 | -1.21863500 |
| C  | 4.75185500  | 1.08139800  | -1.62099600 |
| C  | 5.13461200  | 0.05363400  | -0.82461500 |
| H  | 5.31878400  | 1.76676200  | -2.23713300 |
| H  | 6.10901400  | -0.35560200 | -0.59209200 |
| N  | 3.37087100  | 1.15865100  | -1.53913700 |
| N  | 3.97528500  | -0.47162200 | -0.27470400 |
| C  | 2.89074600  | 0.21028200  | -0.71070800 |
| C  | -0.44496700 | -1.83404400 | 0.92815100  |
| N  | -2.10453600 | -0.57096900 | -2.10770300 |
| C  | -1.66474500 | 0.82608000  | -2.02265200 |
| H  | -2.08758400 | 1.33693700  | -1.15006300 |
| H  | -0.56922200 | 0.88094400  | -1.96831400 |
| H  | -1.98723300 | 1.34122100  | -2.92889800 |
| S  | -3.46446000 | -0.87987700 | -3.14950400 |
| O  | -4.61690300 | -1.26412700 | -2.35900400 |
| O  | -3.52136500 | 0.27980300  | -4.02505500 |
| C  | -0.05729900 | -3.17818200 | 0.38331700  |
| H  | 0.80577100  | -3.57954300 | 0.92653300  |
| H  | 0.22885600  | -3.09959600 | -0.67722500 |
| C  | -0.20046100 | -1.53690100 | 2.37380600  |
| H  | -0.43515000 | -0.49403100 | 2.61671900  |
| H  | -0.86621800 | -2.16602400 | 2.98408300  |
| H  | 0.83758400  | -1.77030900 | 2.65605400  |

|   |             |             |             |
|---|-------------|-------------|-------------|
| C | 3.88920500  | -1.62523300 | 0.57850500  |
| C | 3.69917100  | -2.87373800 | -0.02338900 |
| C | 3.95067300  | -1.44220000 | 1.96333800  |
| C | 3.56148900  | -3.97804300 | 0.81764800  |
| C | 3.80045500  | -2.57413500 | 2.76603100  |
| C | 3.60469200  | -3.82893800 | 2.19979900  |
| H | 3.41270500  | -4.96382700 | 0.37637300  |
| H | 3.84020900  | -2.46174900 | 3.84898500  |
| H | 3.48958600  | -4.70058600 | 2.84221800  |
| C | 2.54097800  | 2.08017200  | -2.27010900 |
| C | 1.94258000  | 1.63297800  | -3.45316500 |
| C | 2.34345500  | 3.35633700  | -1.73881200 |
| C | 1.11700200  | 2.53049700  | -4.12838500 |
| C | 1.50364600  | 4.21583700  | -2.44501100 |
| C | 0.89613800  | 3.80787500  | -3.62529500 |
| H | 0.63450700  | 2.21383800  | -5.05290600 |
| H | 1.30590000  | 5.20739800  | -2.04060200 |
| H | 0.23664900  | 4.49097700  | -4.15726900 |
| C | -2.92819400 | -2.25669100 | -4.14242800 |
| H | -2.81990400 | -3.13375500 | -3.50232000 |
| H | -3.71087200 | -2.40134900 | -4.89465400 |
| H | -1.98501900 | -1.98524000 | -4.62504700 |
| C | 2.97840200  | 3.76628000  | -0.44697900 |
| H | 4.06899300  | 3.87462800  | -0.53887900 |
| H | 2.57020000  | 4.72248600  | -0.10230200 |
| H | 2.77850600  | 3.02876300  | 0.34199100  |
| C | 2.13883000  | 0.23529500  | -3.96161300 |
| H | 3.17362700  | -0.11506800 | -3.84307800 |
| H | 1.49494400  | -0.47836800 | -3.42196800 |
| H | 1.87919800  | 0.16899800  | -5.02438400 |
| C | 4.15335900  | -0.08234800 | 2.55662100  |
| H | 5.08909100  | 0.37786700  | 2.21020900  |
| H | 3.34104700  | 0.60371400  | 2.28245900  |
| H | 4.19080300  | -0.13439800 | 3.64993100  |
| C | 3.61224000  | -3.01256900 | -1.51293300 |
| H | 2.72346400  | -2.49816800 | -1.90874100 |
| H | 4.48231800  | -2.57465800 | -2.02150400 |
| H | 3.54682800  | -4.06657900 | -1.80461600 |

### TS1a

Zero-point correction= 0.634088 (Hartree/Particle)  
 Thermal correction to Energy= 0.677593  
 Thermal correction to Enthalpy= 0.678537  
 Thermal correction to Gibbs Free Energy= 0.554628  
 Sum of electronic and zero-point Energies= -2180.312327  
 Sum of electronic and thermal Energies= -2180.268822  
 Sum of electronic and thermal Enthalpies= -2180.267878  
 Sum of electronic and thermal Free Energies= -2180.391787  
 M06/6-311++G(d,p)-SDD/SMD//M06/6-31G(d)-LANL2DZ energy in DCE solvent = -2181.80829399

### Cartesian coordinates:

|    |             |             |             |
|----|-------------|-------------|-------------|
| C  | -1.38997200 | -0.93631000 | -0.54080800 |
| C  | -2.16818100 | 0.03216700  | -0.16393900 |
| N  | -2.28356500 | 1.31579700  | 0.14321800  |
| S  | -2.31124600 | 1.74703800  | 1.81874700  |
| O  | -1.92950100 | 0.55265900  | 2.54697000  |
| O  | -1.58115000 | 2.99575200  | 1.93317000  |
| Au | 0.61247000  | -0.28171000 | -0.32275600 |
| C  | 2.56948400  | 0.27571600  | -0.06784700 |
| N  | 3.08794200  | 1.52046300  | -0.11861700 |
| C  | 4.77826500  | 0.19646600  | 0.35563700  |
| C  | 4.44949300  | 1.49394000  | 0.14043500  |
| H  | 5.72164300  | -0.27913500 | 0.59025100  |
| H  | 5.04305200  | 2.39877000  | 0.14830500  |
| N  | 3.60841900  | -0.53559700 | 0.22191100  |

|   |             |             |             |
|---|-------------|-------------|-------------|
| N | -4.07695900 | -0.62427100 | -0.04238600 |
| C | -5.85287600 | -1.97158600 | -0.18586900 |
| C | -5.95337000 | -1.00803900 | -1.14348900 |
| C | -2.11673900 | 2.36823300  | -0.86949000 |
| H | -2.68847800 | 2.08516000  | -1.75844200 |
| H | -2.49484700 | 3.31825500  | -0.47944500 |
| H | -1.05325100 | 2.48914300  | -1.11995300 |
| C | -1.65266100 | -2.30652500 | -0.97952400 |
| C | -2.56889100 | -2.57685600 | -1.91855800 |
| H | -3.16150400 | -1.79165100 | -2.38503000 |
| H | -2.71280000 | -3.59256200 | -2.28439800 |
| C | -0.77490300 | -3.36592500 | -0.37484500 |
| H | 0.26876200  | -3.25279600 | -0.70831100 |
| H | -0.75699300 | -3.29424100 | 0.72260500  |
| H | -1.11615700 | -4.36937700 | -0.65518000 |
| C | -4.63648600 | -1.69436100 | 0.48320100  |
| C | -3.98036300 | -2.41651900 | 1.60082300  |
| H | -3.16690700 | -1.81750500 | 2.02761100  |
| H | -4.70194200 | -2.65384000 | 2.39041900  |
| H | -3.56263400 | -3.36435200 | 1.23629200  |
| O | -4.88532800 | -0.18978300 | -1.07216800 |
| C | -6.95777500 | -0.69925800 | -2.18217000 |
| H | -7.77005800 | -1.43084800 | -2.15274400 |
| H | -7.38335300 | 0.30042600  | -2.03186700 |
| H | -6.50594700 | -0.71894100 | -3.18142500 |
| H | -6.55189500 | -2.77156400 | 0.02064500  |
| C | 3.47824600  | -1.95895500 | 0.37704100  |
| C | 3.60810400  | -2.76492300 | -0.75821800 |
| C | 3.18756300  | -2.46072400 | 1.64984000  |
| C | 3.44995700  | -4.14030600 | -0.58687400 |
| C | 3.03694500  | -3.84176800 | 1.77258000  |
| C | 3.16826400  | -4.67309400 | 0.66597200  |
| H | 3.55318800  | -4.79625200 | -1.45057800 |
| H | 2.81634500  | -4.26447600 | 2.75210700  |
| H | 3.05380200  | -5.74925800 | 0.78196200  |
| C | 2.30362600  | 2.69309900  | -0.39519500 |
| C | 1.59670100  | 3.28253500  | 0.65741300  |
| C | 2.26050800  | 3.16023400  | -1.71362500 |
| C | 0.82417100  | 4.40577800  | 0.35513400  |
| C | 1.47811700  | 4.28584400  | -1.96708200 |
| C | 0.77003200  | 4.90403100  | -0.94097900 |
| H | 0.25813000  | 4.88352600  | 1.15297500  |
| H | 1.42955400  | 4.67922200  | -2.98195600 |
| H | 0.17031200  | 5.78714100  | -1.15538300 |
| C | -4.04028000 | 2.06847800  | 2.08453700  |
| H | -4.15721900 | 2.37654800  | 3.12852300  |
| H | -4.35839900 | 2.87468300  | 1.41634800  |
| H | -4.59562400 | 1.14735700  | 1.88487900  |
| C | 1.64355200  | 2.71980600  | 2.04587700  |
| H | 2.66211900  | 2.43541900  | 2.34369600  |
| H | 1.26030400  | 3.44359600  | 2.77238900  |
| H | 1.01613400  | 1.81893000  | 2.13163000  |
| C | 3.01370100  | 2.46612600  | -2.80810100 |
| H | 4.10052300  | 2.50486800  | -2.65070400 |
| H | 2.73965100  | 1.40287900  | -2.87427600 |
| H | 2.80500900  | 2.92787700  | -3.77912000 |
| C | 3.87333900  | -2.17246700 | -2.10930400 |
| H | 4.70579800  | -1.45618500 | -2.09443200 |
| H | 4.11526000  | -2.95360800 | -2.83804700 |
| H | 2.99258500  | -1.62955400 | -2.48460600 |
| C | 3.02185600  | -1.54629800 | 2.82589200  |
| H | 3.89163000  | -0.88986400 | 2.96581000  |
| H | 2.14584700  | -0.89166600 | 2.70438900  |
| H | 2.88359700  | -2.11861800 | 3.74941100  |

TS2a

Zero-point correction= 0.635809 (Hartree/Particle)  
 Thermal correction to Energy= 0.678293  
 Thermal correction to Enthalpy= 0.679237  
 Thermal correction to Gibbs Free Energy= 0.558961  
 Sum of electronic and zero-point Energies= -2180.289357  
 Sum of electronic and thermal Energies= -2180.246873  
 Sum of electronic and thermal Enthalpies= -2180.245929  
 Sum of electronic and thermal Free Energies= -2180.366205  
 M06/6-311++G(d,p)-SDD/SMD//M06/6-31G(d)-LANL2DZ energy in DCE solvent = -2181.78798721

Cartesian coordinates:

|    |             |             |             |
|----|-------------|-------------|-------------|
| C  | -1.31432400 | -1.02805400 | -0.67678500 |
| C  | -2.14968300 | -0.12099200 | -0.26933100 |
| Au | 0.63612200  | -0.27183200 | -0.37709800 |
| C  | -5.69221000 | -1.96481300 | 0.00816100  |
| C  | -5.84445300 | -0.93228800 | -0.96507000 |
| C  | -4.42704900 | -1.84072300 | 0.47392200  |
| N  | -4.75742500 | -0.20995300 | -1.08870900 |
| O  | -3.85286700 | -0.78363200 | -0.17459900 |
| H  | -6.43297400 | -2.69146100 | 0.31714300  |
| C  | -7.03826600 | -0.61939200 | -1.79160100 |
| H  | -7.31964300 | -1.48298800 | -2.40579900 |
| H  | -7.89818500 | -0.37460600 | -1.15677900 |
| H  | -6.83487200 | 0.22918200  | -2.45159500 |
| C  | -3.60981800 | -2.54690300 | 1.47993100  |
| H  | -2.85846100 | -3.17772200 | 0.98510300  |
| H  | -3.07936200 | -1.83636300 | 2.12819400  |
| H  | -4.24762400 | -3.18868400 | 2.09486100  |
| C  | 4.73411900  | 0.37158500  | 0.52049500  |
| C  | 4.36004400  | 1.66018500  | 0.32713000  |
| H  | 5.68424100  | -0.07001900 | 0.79158200  |
| H  | 4.91308000  | 2.58811700  | 0.39173000  |
| C  | 2.54979400  | 0.37117100  | -0.01800600 |
| N  | 3.01346200  | 1.63789000  | -0.00322700 |
| N  | 3.60656300  | -0.40502300 | 0.30241400  |
| N  | -2.35422200 | 1.14602100  | 0.04461800  |
| S  | -2.47884900 | 1.57463000  | 1.71614500  |
| O  | -2.02027800 | 0.41813400  | 2.46288500  |
| O  | -1.86364700 | 2.88116000  | 1.84695400  |
| C  | -2.27197000 | 2.22549800  | -0.95318500 |
| H  | -2.63959300 | 1.83161000  | -1.90397500 |
| H  | -2.90255300 | 3.06586200  | -0.64528100 |
| H  | -1.23458400 | 2.57402100  | -1.04859000 |
| C  | -1.50227100 | -2.39041500 | -1.17949300 |
| C  | -2.45523000 | -2.67908300 | -2.07659300 |
| H  | -3.13765100 | -1.92290300 | -2.46196900 |
| H  | -2.54037200 | -3.68107100 | -2.49478000 |
| C  | -4.23821300 | 1.74990100  | 1.92676200  |
| H  | -4.70925500 | 0.76697100  | 1.82944800  |
| H  | -4.40154600 | 2.15742600  | 2.92973300  |
| H  | -4.62212100 | 2.44322400  | 1.17180700  |
| C  | 2.19009600  | 2.78236800  | -0.28643600 |
| C  | 2.19597300  | 3.29309800  | -1.58944300 |
| C  | 1.39014500  | 3.29471400  | 0.74028800  |
| C  | 1.36896000  | 4.38420200  | -1.85121600 |
| C  | 0.57525800  | 4.38529000  | 0.42980300  |
| C  | 0.56893100  | 4.92644300  | -0.85029500 |
| H  | 1.35672800  | 4.80938600  | -2.85419900 |
| H  | -0.06406000 | 4.80080400  | 1.20674600  |
| H  | -0.06548200 | 5.78288800  | -1.07224500 |
| C  | 3.51799400  | -1.83456400 | 0.43236500  |
| C  | 3.18998200  | -2.36305300 | 1.68579100  |
| C  | 3.71776100  | -2.62125800 | -0.70651200 |
| C  | 3.06898800  | -3.74919000 | 1.78247900  |
| C  | 3.59060500  | -4.00301300 | -0.56008700 |
| C  | 3.26892400  | -4.56101200 | 0.67182200  |



|   |             |             |             |
|---|-------------|-------------|-------------|
| H | 2.81973200  | -4.19140800 | 2.74638800  |
| H | 3.74972700  | -4.64311900 | -1.42711900 |
| H | 3.17788200  | -5.64124500 | 0.76873900  |
| C | 4.01964000  | -2.00234300 | -2.03733700 |
| H | 3.14525500  | -1.46045500 | -2.42851200 |
| H | 4.84399400  | -1.27874500 | -1.98256500 |
| H | 4.29201700  | -2.76769500 | -2.77192600 |
| C | 3.04027900  | 2.67691200  | -2.66347500 |
| H | 4.11341300  | 2.74284300  | -2.43745700 |
| H | 2.80733900  | 1.61003900  | -2.79576500 |
| H | 2.87513200  | 3.17661000  | -3.62403800 |
| C | 1.38741200  | 2.68811700  | 2.11125000  |
| H | 2.40041700  | 2.43766700  | 2.45469500  |
| H | 0.93594500  | 3.37175900  | 2.83759800  |
| H | 0.79802100  | 1.75787900  | 2.13788200  |
| C | 2.96167200  | -1.47687700 | 2.87264100  |
| H | 3.83699700  | -0.85193200 | 3.09731900  |
| H | 2.11436500  | -0.79431400 | 2.71176400  |
| H | 2.74173800  | -2.07181900 | 3.76559400  |
| C | -0.51169400 | -3.41226000 | -0.69559600 |
| H | -0.78178600 | -4.41792600 | -1.03810100 |
| H | 0.50365700  | -3.18554600 | -1.05782400 |
| H | -0.44426600 | -3.42294300 | 0.40277300  |

### TS3a

Zero-point correction= 0.633946 (Hartree/Particle)

Thermal correction to Energy= 0.677335

Thermal correction to Enthalpy= 0.678279

Thermal correction to Gibbs Free Energy= 0.554679

Sum of electronic and zero-point Energies= -2180.293210

Sum of electronic and thermal Energies= -2180.249821

Sum of electronic and thermal Enthalpies= -2180.248876

Sum of electronic and thermal Free Energies= -2180.372477

M06/6-311++G(d,p)-SDD/SMD//M06/6-31G(d)-LANL2DZ energy in DCE solvent = -2181.79028253

### Cartesian coordinates:

|    |             |             |             |
|----|-------------|-------------|-------------|
| C  | 1.91414100  | -1.04017500 | 0.44243700  |
| C  | 1.51748400  | 0.17736400  | 0.50315200  |
| Au | -0.59491600 | -0.02546900 | 0.36380100  |
| C  | 6.17105600  | -0.45710900 | 0.10300100  |
| C  | 5.77524600  | -0.37785600 | 1.40398400  |
| C  | 5.01419500  | -0.87498300 | -0.60293100 |
| O  | 4.47873900  | -0.71561800 | 1.49652500  |
| N  | 4.01160700  | -1.02865100 | 0.23937900  |
| H  | 7.15617400  | -0.26481600 | -0.30279000 |
| N  | 2.15086600  | 1.42441200  | 0.42420400  |
| C  | 4.87221300  | -1.14810900 | -2.05569800 |
| H  | 5.39590000  | -2.07523800 | -2.32194900 |
| H  | 3.82009100  | -1.22667800 | -2.34156400 |
| H  | 5.31978700  | -0.33792300 | -2.64383700 |
| C  | 6.46139500  | -0.02597800 | 2.66467600  |
| H  | 6.47282200  | -0.87999100 | 3.35296400  |
| H  | 7.49460800  | 0.27178000  | 2.46497800  |
| H  | 5.94879700  | 0.79953800  | 3.17293300  |
| S  | 2.35652400  | 1.94450900  | -1.21226600 |
| O  | 2.43318200  | 0.75150700  | -2.03839300 |
| O  | 1.37969300  | 2.98359100  | -1.50321900 |
| C  | 1.54809300  | 2.46502800  | 1.27397900  |
| H  | 2.15359200  | 3.37583800  | 1.21844100  |
| H  | 0.51489300  | 2.70319500  | 0.97820900  |
| H  | 1.56574800  | 2.10028700  | 2.30505900  |
| C  | 1.62668000  | -2.44842200 | 0.35649400  |
| C  | 1.14818800  | -3.07885600 | 1.43919200  |
| H  | 1.02277800  | -2.56376500 | 2.38962800  |
| H  | 0.84079300  | -4.12223600 | 1.38610500  |

|   |             |             |             |
|---|-------------|-------------|-------------|
| C | 1.81784200  | -3.10106000 | -0.97861800 |
| H | 1.42724700  | -4.12501300 | -0.97071900 |
| H | 1.30145700  | -2.52955800 | -1.76460400 |
| H | 2.88249400  | -3.14107800 | -1.24654400 |
| C | 3.97183400  | 2.68563800  | -1.11442800 |
| H | 4.68695200  | 1.92023600  | -0.79403700 |
| H | 4.21426500  | 3.05631200  | -2.11572400 |
| H | 3.95063700  | 3.51954200  | -0.40688200 |
| C | -2.60070300 | -0.06229000 | -0.03125200 |
| N | -3.35776100 | -1.14098200 | -0.31939500 |
| C | -4.67791300 | 0.60078800  | -0.57070800 |
| C | -4.64640200 | -0.75258200 | -0.65595000 |
| H | -5.47201800 | 1.31408500  | -0.74830700 |
| H | -5.40659900 | -1.47521200 | -0.92259000 |
| N | -3.40937500 | 1.00526400  | -0.18509900 |
| C | -2.95723500 | 2.35808500  | 0.00932100  |
| C | -2.22643400 | 2.97037700  | -1.01421200 |
| C | -3.21639700 | 2.96723000  | 1.24267200  |
| C | -1.74934100 | 4.26007100  | -0.77288100 |
| C | -2.72697800 | 4.25776500  | 1.43414000  |
| C | -1.99988500 | 4.89777900  | 0.43535300  |
| H | -1.16857700 | 4.75780700  | -1.54821300 |
| H | -2.91771200 | 4.76089100  | 2.38144600  |
| H | -1.62534300 | 5.90612300  | 0.60209100  |
| C | -2.83810000 | -2.48208600 | -0.31732000 |
| C | -2.94203500 | -3.23488100 | 0.85656000  |
| C | -2.20352500 | -2.94573400 | -1.47468900 |
| C | -2.39845500 | -4.51944100 | 0.84416500  |
| C | -1.67323500 | -4.23554200 | -1.44016200 |
| C | -1.77204100 | -5.01597900 | -0.29375500 |
| H | -2.47478100 | -5.13441400 | 1.74035100  |
| H | -1.18357400 | -4.62892600 | -2.33096000 |
| H | -1.36369700 | -6.02545500 | -0.28936000 |
| C | -3.58659800 | -2.67056300 | 2.08606500  |
| H | -4.60259500 | -2.30218200 | 1.89054400  |
| H | -3.65168600 | -3.42621400 | 2.87618200  |
| H | -3.01105700 | -1.82050500 | 2.48194800  |
| C | -2.06975200 | -2.08313600 | -2.69324000 |
| H | -3.02138000 | -1.61517000 | -2.97945700 |
| H | -1.35082400 | -1.26553000 | -2.52649300 |
| H | -1.71311700 | -2.66782600 | -3.54836000 |
| C | -1.92283700 | 2.27306000  | -2.30558200 |
| H | -2.75274700 | 1.63995300  | -2.64683300 |
| H | -1.69762400 | 2.99970200  | -3.09382800 |
| H | -1.03475900 | 1.62962200  | -2.20465500 |
| C | -3.96787200 | 2.24769000  | 2.32182600  |
| H | -5.00445500 | 2.02799700  | 2.03108500  |
| H | -3.49507800 | 1.28516400  | 2.56735800  |
| H | -4.00349200 | 2.84690200  | 3.23790400  |

#### TS4a

Zero-point correction= 0.633899 (Hartree/Particle)  
 Thermal correction to Energy= 0.676754  
 Thermal correction to Enthalpy= 0.677698  
 Thermal correction to Gibbs Free Energy= 0.557065  
 Sum of electronic and zero-point Energies= -2180.271434  
 Sum of electronic and thermal Energies= -2180.228579  
 Sum of electronic and thermal Enthalpies= -2180.227635  
 Sum of electronic and thermal Free Energies= -2180.348268  
 M06/6-311++G(d,p)-SDD/SMD//M06/6-31G(d)-LANL2DZ energy in DCE solvent = -2181.76762606

#### Cartesian coordinates:

|   |            |             |             |
|---|------------|-------------|-------------|
| C | 2.18797900 | 0.91038600  | -0.55048000 |
| C | 1.54155300 | -0.15395900 | -0.13618600 |
| C | 5.56684700 | -0.62543100 | -0.84989400 |

|    |             |             |             |
|----|-------------|-------------|-------------|
| C  | 5.69384300  | -0.16535800 | 0.49883000  |
| N  | 2.23741600  | -1.34329600 | 0.27409800  |
| O  | 3.90028800  | 0.65926400  | -0.44669100 |
| C  | 2.12447900  | -2.40745300 | -0.74182000 |
| H  | 1.07928300  | -2.70917600 | -0.91218800 |
| H  | 2.56005900  | -2.02391500 | -1.66943600 |
| H  | 2.70492700  | -3.27997000 | -0.42084000 |
| S  | 1.72680700  | -1.85473300 | 1.83331300  |
| O  | 1.56114800  | -0.63588000 | 2.61530000  |
| O  | 0.65083500  | -2.83315900 | 1.75265500  |
| C  | 4.61769400  | 0.61789200  | 0.72832100  |
| N  | 4.49380400  | -0.16319100 | -1.43714700 |
| C  | 4.10459500  | 1.40735400  | 1.86175600  |
| H  | 3.17666700  | 0.96868900  | 2.25818200  |
| H  | 4.85165300  | 1.43177000  | 2.66074900  |
| H  | 3.88907000  | 2.43754400  | 1.55018900  |
| H  | 6.49941400  | -0.38113300 | 1.18959100  |
| C  | 6.48783300  | -1.51656400 | -1.60019100 |
| H  | 7.48524300  | -1.06682000 | -1.67167800 |
| H  | 6.59734400  | -2.47930400 | -1.08664300 |
| H  | 6.11111400  | -1.69448900 | -2.61177500 |
| C  | 3.19924900  | -2.68975600 | 2.38593000  |
| H  | 4.03217200  | -1.98090500 | 2.37479300  |
| H  | 2.99544700  | -3.03116600 | 3.40591500  |
| H  | 3.40489900  | -3.55240000 | 1.74591200  |
| Au | -0.55596200 | -0.15364600 | -0.17501100 |
| C  | -2.60839000 | -0.27708400 | -0.11432100 |
| N  | -3.36807100 | -1.36634700 | -0.35265600 |
| C  | -4.77938100 | 0.22519000  | 0.20407600  |
| C  | -4.70990300 | -1.07914200 | -0.15956100 |
| H  | -5.61933500 | 0.86006800  | 0.45383200  |
| H  | -5.47645400 | -1.83057900 | -0.29714700 |
| N  | -3.47674200 | 0.69969400  | 0.22464100  |
| C  | -3.06729100 | 2.02799200  | 0.58852000  |
| C  | -3.11446000 | 3.02728800  | -0.38992000 |
| C  | -2.61015900 | 2.24909700  | 1.89212300  |
| C  | -2.69350200 | 4.30489200  | -0.02304000 |
| C  | -2.20194300 | 3.54477300  | 2.21378400  |
| C  | -2.24484400 | 4.56196900  | 1.26815600  |
| H  | -2.72382900 | 5.10476200  | -0.76231800 |
| H  | -1.85069600 | 3.75089200  | 3.22430200  |
| H  | -1.92821900 | 5.56719300  | 1.54033800  |
| C  | -2.81357900 | -2.64673800 | -0.70259400 |
| C  | -2.39800500 | -3.48556200 | 0.33558200  |
| C  | -2.66902600 | -2.96222200 | -2.05713500 |
| C  | -1.81218300 | -4.69961600 | -0.02294500 |
| C  | -2.08557400 | -4.18982300 | -2.36716500 |
| C  | -1.65954200 | -5.04877700 | -1.35934400 |
| H  | -1.47021800 | -5.37071500 | 0.76394300  |
| H  | -1.96535900 | -4.46957200 | -3.41325100 |
| H  | -1.20693500 | -6.00386900 | -1.62014800 |
| C  | -2.55045600 | -3.08198600 | 1.76985700  |
| H  | -3.57800000 | -2.77138700 | 2.00497800  |
| H  | -2.28264100 | -3.90837200 | 2.43671900  |
| H  | -1.88442700 | -2.24175200 | 2.01422400  |
| C  | -3.10030400 | -2.00703900 | -3.12859400 |
| H  | -4.15570500 | -1.71935400 | -3.02785900 |
| H  | -2.51235500 | -1.07778800 | -3.09589100 |
| H  | -2.96906600 | -2.44915700 | -4.12209100 |
| C  | -3.58407000 | 2.73024100  | -1.78218500 |
| H  | -4.65190800 | 2.47266100  | -1.81161100 |
| H  | -3.43771800 | 3.59654600  | -2.43642000 |
| H  | -3.04181800 | 1.87932900  | -2.22005000 |
| C  | -2.52546300 | 1.14188600  | 2.89950700  |
| H  | -3.37417100 | 0.44829500  | 2.83202300  |
| H  | -1.61019000 | 0.54546800  | 2.75728700  |
| H  | -2.49696300 | 1.54450700  | 3.91812600  |
| C  | 2.01200500  | 2.25322800  | -1.05777900 |

|   |             |            |             |
|---|-------------|------------|-------------|
| C | 0.60973300  | 2.79769700 | -0.97686600 |
| C | 3.01049500  | 2.98642400 | -1.57078900 |
| H | -0.06803600 | 2.25338700 | -1.64934700 |
| H | 4.02775100  | 2.62368000 | -1.67891400 |
| H | 0.19337000  | 2.71831700 | 0.03721100  |
| H | 0.60586300  | 3.85315100 | -1.27180900 |
| H | 2.80845900  | 3.99400400 | -1.92562300 |

### TS5a

Zero-point correction= 0.633645 (Hartree/Particle)  
 Thermal correction to Energy= 0.676624  
 Thermal correction to Enthalpy= 0.677568  
 Thermal correction to Gibbs Free Energy= 0.555879  
 Sum of electronic and zero-point Energies= -2180.321721  
 Sum of electronic and thermal Energies= -2180.278742  
 Sum of electronic and thermal Enthalpies= -2180.277797  
 Sum of electronic and thermal Free Energies= -2180.399487  
 M06/6-311++G(d,p)-SDD/SMD//M06/6-31G(d)-LANL2DZ energy in DCE solvent = -2181.81534719

### Cartesian coordinates:

|    |             |             |             |
|----|-------------|-------------|-------------|
| C  | 1.43968000  | 0.50276000  | -1.11158800 |
| C  | 2.34793500  | -0.36077200 | -0.51116300 |
| N  | 2.07872600  | -1.71437700 | -0.23613600 |
| S  | 2.02745200  | -2.19400500 | 1.39207000  |
| O  | 1.84645700  | -0.99645800 | 2.20457200  |
| O  | 1.09695800  | -3.30671400 | 1.47927000  |
| Au | -0.55177100 | 0.24043200  | -0.60856600 |
| C  | -2.47211500 | 0.15620200  | 0.14593300  |
| N  | -3.30013600 | -0.89852500 | 0.28279200  |
| C  | -4.36514800 | 0.80697700  | 1.17614400  |
| C  | -4.47355900 | -0.52002800 | 0.91592800  |
| H  | -5.03968600 | 1.50408400  | 1.65584800  |
| H  | -5.26322900 | -1.23135300 | 1.12009900  |
| N  | -3.12712500 | 1.20265500  | 0.69388400  |
| N  | 3.52984300  | 0.09759200  | -0.04476500 |
| C  | 5.28563700  | 1.46763800  | 0.41900000  |
| C  | 5.83880900  | 0.49717500  | -0.41461300 |
| C  | 1.32759800  | -2.53588600 | -1.19014300 |
| H  | 1.55977000  | -2.16791000 | -2.19408100 |
| H  | 1.65298500  | -3.57865700 | -1.11043400 |
| H  | 0.24153700  | -2.49483700 | -1.02628200 |
| C  | 1.87089800  | 1.70011500  | -1.81088000 |
| C  | 2.98326400  | 1.68498900  | -2.57607600 |
| H  | 3.61217800  | 0.80080200  | -2.66276000 |
| H  | 3.25242600  | 2.54208100  | -3.19216700 |
| C  | 0.96410900  | 2.90076000  | -1.77889900 |
| H  | 0.03244100  | 2.69746900  | -2.32681500 |
| H  | 0.66319900  | 3.16664200  | -0.75383400 |
| H  | 1.44445600  | 3.77376700  | -2.23591500 |
| C  | 3.93813100  | 1.19014100  | 0.59851200  |
| C  | 2.98442100  | 1.94499600  | 1.45732100  |
| H  | 2.35550800  | 1.24811800  | 2.02483700  |
| H  | 3.53015500  | 2.60361900  | 2.13944200  |
| H  | 2.32660900  | 2.56109100  | 0.82858900  |
| O  | 5.00936300  | -0.38197700 | -0.85157500 |
| C  | 7.27008600  | 0.37024200  | -0.80014800 |
| H  | 7.86466300  | 1.18903500  | -0.38475900 |
| H  | 7.67040300  | -0.58492600 | -0.43947000 |
| H  | 7.36789200  | 0.36976600  | -1.89200200 |
| H  | 5.82519600  | 2.27055200  | 0.90562800  |
| C  | -2.54057800 | 2.51144000  | 0.79130000  |
| C  | -2.84114600 | 3.44904000  | -0.20236000 |
| C  | -1.64326300 | 2.75962500  | 1.83631300  |
| C  | -2.21825100 | 4.69389200  | -0.12076200 |
| C  | -1.04069200 | 4.01840500  | 1.87444600  |

|   |             |             |             |
|---|-------------|-------------|-------------|
| C | -1.32677300 | 4.97643800  | 0.90844700  |
| H | -2.43778300 | 5.44633200  | -0.87733600 |
| H | -0.34778800 | 4.24698800  | 2.68420300  |
| H | -0.85486400 | 5.95597600  | 0.96085300  |
| C | -2.92790800 | -2.23311400 | -0.10487700 |
| C | -2.19546800 | -2.99544900 | 0.81079700  |
| C | -3.26322200 | -2.67547800 | -1.38822000 |
| C | -1.78846600 | -4.26572200 | 0.40107600  |
| C | -2.84192500 | -3.95427500 | -1.75057100 |
| C | -2.11096300 | -4.73993900 | -0.86500600 |
| H | -1.20129900 | -4.87479300 | 1.08629600  |
| H | -3.09217900 | -4.33283000 | -2.74104400 |
| H | -1.79045900 | -5.73566800 | -1.16638900 |
| C | 3.66844100  | -2.82299100 | 1.66947000  |
| H | 3.71901100  | -3.16901300 | 2.70671300  |
| H | 3.83537700  | -3.65721300 | 0.98125400  |
| H | 4.39170400  | -2.02215300 | 1.49036400  |
| C | -1.84292000 | -2.45882600 | 2.16481600  |
| H | -2.72134600 | -2.05847600 | 2.69008000  |
| H | -1.39414700 | -3.23911800 | 2.78711700  |
| H | -1.10499000 | -1.64514800 | 2.09298600  |
| C | -4.02914300 | -1.80233700 | -2.33572100 |
| H | -5.00937600 | -1.51532800 | -1.93064300 |
| H | -3.48828500 | -0.86892700 | -2.55080800 |
| H | -4.20127400 | -2.31580100 | -3.28772100 |
| C | -3.76873800 | 3.11181700  | -1.32999600 |
| H | -4.77463300 | 2.84907800  | -0.97554200 |
| H | -3.87034100 | 3.95687000  | -2.01918600 |
| H | -3.40023800 | 2.24917900  | -1.90537800 |
| C | -1.30634600 | 1.71319000  | 2.85637700  |
| H | -2.18554000 | 1.13327700  | 3.16679700  |
| H | -0.57147300 | 0.99084900  | 2.46474900  |
| H | -0.87157000 | 2.17015100  | 3.75259000  |

### TS6a

Zero-point correction= 0.633706 (Hartree/Particle)

Thermal correction to Energy= 0.676716

Thermal correction to Enthalpy= 0.677660

Thermal correction to Gibbs Free Energy= 0.555751

Sum of electronic and zero-point Energies= -2180.315135

Sum of electronic and thermal Energies= -2180.272126

Sum of electronic and thermal Enthalpies= -2180.271181

Sum of electronic and thermal Free Energies= -2180.393091

M06/6-311++G(d,p)-SDD/SMD//M06/6-31G(d)-LANL2DZ energy in DCE solvent = -2181.80824343

Cartesian coordinates:

|   |             |             |             |
|---|-------------|-------------|-------------|
| C | -6.00035600 | -0.97901600 | 0.19624300  |
| C | -5.90814100 | -0.40523700 | -1.07658400 |
| C | -4.72671300 | -1.24038000 | 0.66164600  |
| N | -3.73237100 | -0.96875000 | -0.19284500 |
| O | -4.71727400 | -0.23079700 | -1.50039300 |
| H | -6.91687000 | -1.22817900 | 0.71691100  |
| C | -7.04879000 | -0.03386800 | -1.95713500 |
| H | -7.06557000 | -0.69341900 | -2.83370500 |
| H | -8.00256800 | -0.12160800 | -1.42887000 |
| H | -6.92540200 | 0.99089500  | -2.32472400 |
| C | -4.38959300 | -1.90269500 | 1.95312100  |
| H | -4.07479100 | -2.93590400 | 1.75706600  |
| H | -3.55053600 | -1.40569900 | 2.45545000  |
| H | -5.26863500 | -1.92597900 | 2.60350700  |
| C | -1.39603900 | -1.04324900 | -0.66511800 |
| C | -2.51106700 | -0.41806300 | -0.10669600 |
| N | -2.44742500 | 0.87393400  | 0.51359900  |
| S | -1.73694300 | 0.98944900  | 2.04535000  |
| O | -1.64448900 | -0.36483200 | 2.57739200  |
| O | -0.56275400 | 1.84830900  | 1.98980100  |

|    |             |             |             |
|----|-------------|-------------|-------------|
| Au | 0.50552300  | -0.29775300 | -0.35161500 |
| C  | 2.44881300  | 0.37866300  | -0.11649100 |
| N  | 2.94499700  | 1.62857000  | -0.23265900 |
| C  | 4.67185900  | 0.35508400  | 0.24852200  |
| C  | 4.31287100  | 1.63664900  | -0.01042800 |
| H  | 5.62997500  | -0.09278700 | 0.47753600  |
| H  | 4.89047000  | 2.55046300  | -0.05831300 |
| N  | 3.51254600  | -0.40018800 | 0.17622400  |
| C  | -2.20446900 | 2.00738500  | -0.38729900 |
| H  | -2.92974700 | 1.94405200  | -1.20543300 |
| H  | -2.36352500 | 2.95180900  | 0.14527500  |
| H  | -1.18055600 | 2.00765200  | -0.79376300 |
| C  | -1.50996000 | -2.26085000 | -1.44978300 |
| C  | -2.40523700 | -2.35901700 | -2.45249200 |
| H  | -3.12255800 | -1.57220800 | -2.67098200 |
| H  | -2.38389600 | -3.21104700 | -3.13139000 |
| C  | -0.47926700 | -3.33065100 | -1.20582400 |
| H  | 0.52311300  | -3.00056200 | -1.51801400 |
| H  | -0.40534900 | -3.57818900 | -0.13813900 |
| H  | -0.72881300 | -4.24474100 | -1.75704100 |
| C  | 3.40468900  | -1.81792200 | 0.38382500  |
| C  | 3.65935400  | -2.66460900 | -0.70008400 |
| C  | 2.99542000  | -2.27534400 | 1.64028200  |
| C  | 3.50933100  | -4.03494500 | -0.49109000 |
| C  | 2.85895700  | -3.65452800 | 1.80226100  |
| C  | 3.11478500  | -4.52481500 | 0.74922200  |
| H  | 3.70489100  | -4.72111400 | -1.31450300 |
| H  | 2.54916000  | -4.04382100 | 2.77148100  |
| H  | 3.00749900  | -5.59790000 | 0.89680000  |
| C  | 2.12901500  | 2.77788500  | -0.51151700 |
| C  | 1.72011100  | 3.56896000  | 0.56600600  |
| C  | 1.75686000  | 3.02567500  | -1.83707000 |
| C  | 0.89219100  | 4.65479500  | 0.28175300  |
| C  | 0.93107600  | 4.12464200  | -2.07310900 |
| C  | 0.50175100  | 4.93004400  | -1.02339200 |
| H  | 0.55402100  | 5.28770400  | 1.10156500  |
| H  | 0.63129700  | 4.35090600  | -3.09594400 |
| H  | -0.13796100 | 5.78709700  | -1.22755500 |
| C  | -2.99570300 | 1.86160800  | 2.95653500  |
| H  | -2.61838200 | 2.01038200  | 3.97321600  |
| H  | -3.18097500 | 2.83041000  | 2.48306600  |
| H  | -3.90699900 | 1.25614900  | 2.96798800  |
| C  | 2.15305200  | 3.25752500  | 1.96539700  |
| H  | 3.21749800  | 3.48332100  | 2.12170900  |
| H  | 1.57789000  | 3.84513900  | 2.68868600  |
| H  | 1.99814100  | 2.19691400  | 2.20440700  |
| C  | 2.21351800  | 2.14035400  | -2.95764500 |
| H  | 3.28793300  | 1.91921300  | -2.89750900 |
| H  | 1.68870800  | 1.17273500  | -2.94497400 |
| H  | 2.01977100  | 2.60928500  | -3.92864800 |
| C  | 4.04638900  | -2.11313800 | -2.03921500 |
| H  | 5.00807300  | -1.58269100 | -2.00692300 |
| H  | 4.13641700  | -2.91436000 | -2.78067900 |
| H  | 3.29976300  | -1.39314900 | -2.40760900 |
| C  | 2.68301400  | -1.32474700 | 2.75676200  |
| H  | 3.43941200  | -0.53394400 | 2.85233200  |
| H  | 1.71438800  | -0.82486200 | 2.59741700  |
| H  | 2.62504300  | -1.85425900 | 3.71402900  |

#### TS7a

|                                            |                             |
|--------------------------------------------|-----------------------------|
| Zero-point correction=                     | 0.634137 (Hartree/Particle) |
| Thermal correction to Energy=              | 0.677416                    |
| Thermal correction to Enthalpy=            | 0.678360                    |
| Thermal correction to Gibbs Free Energy=   | 0.556095                    |
| Sum of electronic and zero-point Energies= | -2180.341893                |
| Sum of electronic and thermal Energies=    | -2180.298614                |

Sum of electronic and thermal Enthalpies= -2180.297670  
Sum of electronic and thermal Free Energies= -2180.419935  
M06/6-311++G(d,p)-SDD/SMD//M06/6-31G(d)-LANL2DZ energy in DCE solvent = -2181.84109712

Cartesian coordinates:

|    |             |             |             |
|----|-------------|-------------|-------------|
| C  | -3.81183600 | -2.84868200 | 0.57068400  |
| C  | -5.13743300 | -2.45018100 | 0.03848000  |
| C  | -2.87385400 | -1.95374700 | 1.07213200  |
| O  | -5.41621400 | -1.29965500 | -0.26061300 |
| H  | -3.73806600 | -3.87592900 | 0.93367700  |
| C  | -1.81259800 | -2.39070600 | 2.02672500  |
| H  | -1.66292200 | -1.62598400 | 2.79857400  |
| H  | -2.02885200 | -3.35582900 | 2.49422000  |
| H  | -0.86087400 | -2.46621100 | 1.47020500  |
| C  | -6.12497800 | -3.57369900 | -0.10986700 |
| H  | -7.02485400 | -3.21672400 | -0.61701900 |
| H  | -5.68432900 | -4.40962500 | -0.67140000 |
| H  | -6.40147700 | -3.96987600 | 0.87694600  |
| C  | -1.25438000 | -0.87153000 | -1.02278300 |
| C  | -2.30582500 | -0.10515900 | -0.34418000 |
| Au | 0.62758000  | -0.20749900 | -0.48742600 |
| N  | -2.83186900 | -0.67916900 | 0.68704800  |
| C  | 4.06362100  | 1.82286100  | 0.98139100  |
| C  | 4.53714600  | 0.55273900  | 1.04536400  |
| H  | 4.50761700  | 2.77058000  | 1.25660200  |
| H  | 5.48330800  | 0.15310000  | 1.38653200  |
| N  | 2.78361900  | 1.74267000  | 0.45999400  |
| N  | 3.53250800  | -0.26916900 | 0.55916500  |
| C  | 2.45534500  | 0.45995900  | 0.20000900  |
| C  | -1.53208300 | -2.12389700 | -1.56531300 |
| N  | -2.54544300 | 1.20281300  | -0.65044200 |
| C  | -1.88800600 | 1.83911600  | -1.79623700 |
| H  | -0.93703600 | 2.31004200  | -1.51110200 |
| H  | -1.70659300 | 1.07559600  | -2.55885100 |
| H  | -2.55229100 | 2.60209400  | -2.20812200 |
| S  | -3.20920300 | 2.27683500  | 0.55592400  |
| O  | -2.53830500 | 2.00716300  | 1.81410900  |
| O  | -3.13592100 | 3.58704700  | -0.06214100 |
| C  | -2.86089700 | -2.53455000 | -1.67627700 |
| H  | -3.10995100 | -3.53060800 | -2.04409700 |
| H  | -3.66233400 | -1.80109900 | -1.68314800 |
| C  | -0.40877600 | -3.06055500 | -1.92303700 |
| H  | 0.28684200  | -2.57711600 | -2.62144000 |
| H  | 0.17816300  | -3.34014400 | -1.03626700 |
| H  | -0.77533900 | -3.97860300 | -2.39637000 |
| C  | 3.57249100  | -1.70392600 | 0.47624100  |
| C  | 3.99486800  | -2.29199000 | -0.71962100 |
| C  | 3.14273800  | -2.43939800 | 1.58622100  |
| C  | 3.99642800  | -3.68584800 | -0.78096900 |
| C  | 3.15885700  | -3.82962500 | 1.47799200  |
| C  | 3.58503800  | -4.44691000 | 0.30693800  |
| H  | 4.33056000  | -4.17430300 | -1.69562000 |
| H  | 2.84025800  | -4.43060600 | 2.32913500  |
| H  | 3.60090100  | -5.53335200 | 0.24334900  |
| C  | 1.87437300  | 2.83418100  | 0.22880500  |
| C  | 2.00002200  | 3.55599300  | -0.96361000 |
| C  | 0.86545900  | 3.06841900  | 1.16997300  |
| C  | 1.06317700  | 4.56071500  | -1.20448600 |
| C  | -0.05130300 | 4.08065500  | 0.88230700  |
| C  | 0.04395400  | 4.81598800  | -0.29284400 |
| H  | 1.13469500  | 5.14083600  | -2.12396200 |
| H  | -0.85883200 | 4.27785500  | 1.58574100  |
| H  | -0.69328000 | 5.58876400  | -0.50167600 |
| C  | -4.90270200 | 1.75857900  | 0.63418200  |
| H  | -4.95216700 | 0.68363900  | 0.82969200  |
| H  | -5.36475900 | 2.33398500  | 1.44314500  |
| H  | -5.37281600 | 1.99681400  | -0.32406400 |
| C  | 0.73047700  | 2.24615700  | 2.41644900  |

|   |            |             |             |
|---|------------|-------------|-------------|
| H | 1.70293900 | 1.95549600  | 2.83588600  |
| H | 0.17245400 | 2.79512800  | 3.18255600  |
| H | 0.16315800 | 1.32237700  | 2.21751300  |
| C | 3.08150000 | 3.24126200  | -1.95310700 |
| H | 4.08305900 | 3.45380700  | -1.55410500 |
| H | 3.07197300 | 2.17872800  | -2.23891000 |
| H | 2.95989000 | 3.83501300  | -2.86536200 |
| C | 2.66778100 | -1.75713000 | 2.83375000  |
| H | 3.42865700 | -1.08496400 | 3.25354500  |
| H | 1.77590900 | -1.14140000 | 2.64140600  |
| H | 2.41033100 | -2.48974300 | 3.60639900  |
| C | 4.40552000 | -1.45902900 | -1.89603700 |
| H | 3.54311300 | -0.93460900 | -2.33447100 |
| H | 5.13977700 | -0.68900100 | -1.62370200 |
| H | 4.84862600 | -2.08189300 | -2.68044700 |

### TS8a

Zero-point correction= 0.634182 (Hartree/Particle)  
 Thermal correction to Energy= 0.677054  
 Thermal correction to Enthalpy= 0.677999  
 Thermal correction to Gibbs Free Energy= 0.558164  
 Sum of electronic and zero-point Energies= -2180.333640  
 Sum of electronic and thermal Energies= -2180.290767  
 Sum of electronic and thermal Enthalpies= -2180.289823  
 Sum of electronic and thermal Free Energies= -2180.409658  
 M06/6-311++G(d,p)-SDD/SMD//M06/6-31G(d)-LANL2DZ energy in DCE solvent = -2181.83636173

Cartesian coordinates:

|    |             |             |             |
|----|-------------|-------------|-------------|
| C  | -1.13559900 | -1.48355800 | 0.12743100  |
| C  | -2.29878900 | -0.61244400 | -0.18260100 |
| N  | -2.76733700 | -0.60424500 | -1.47283500 |
| S  | -3.96484200 | 0.59581700  | -1.94621100 |
| O  | -3.47402500 | 1.91450200  | -1.59925700 |
| O  | -4.25325600 | 0.25518700  | -3.32643200 |
| Au | 0.57151100  | -0.34228300 | 0.20128800  |
| C  | 2.18413000  | 0.91421300  | -0.08308400 |
| N  | 2.16189900  | 2.26407800  | -0.13504600 |
| C  | 4.19445900  | 1.67710900  | -0.74165600 |
| C  | 3.39380800  | 2.75320800  | -0.53725000 |
| H  | 5.22537000  | 1.59671800  | -1.06115000 |
| H  | 3.57680100  | 3.81503800  | -0.63825400 |
| N  | 3.43103700  | 0.55790200  | -0.45655200 |
| N  | -2.75659500 | 0.21869700  | 0.69863300  |
| C  | -2.27529000 | 0.09110500  | 1.96971700  |
| C  | -3.15020900 | -2.24037000 | 2.44947800  |
| C  | -2.28407200 | -1.08454800 | 2.68974100  |
| C  | -1.76433600 | 1.36094600  | 2.56196500  |
| H  | -1.43337800 | 1.23641600  | 3.59750400  |
| H  | -0.93709300 | 1.76282900  | 1.95676600  |
| H  | -2.55920400 | 2.11809600  | 2.52166900  |
| O  | -3.95763700 | -2.31358600 | 1.52736100  |
| C  | -2.99145900 | -3.37393000 | 3.42762500  |
| H  | -3.71429700 | -4.16352800 | 3.20502900  |
| H  | -1.97075700 | -3.78069500 | 3.35945900  |
| H  | -3.12639000 | -3.03571100 | 4.46313800  |
| C  | -2.04077800 | -1.26123800 | -2.56056500 |
| H  | -0.95653800 | -1.16974300 | -2.40151100 |
| H  | -2.30085500 | -2.32416600 | -2.63522900 |
| H  | -2.30573100 | -0.77666100 | -3.50269800 |
| C  | -1.18029600 | -2.90292600 | 0.09288400  |
| C  | -2.33965700 | -3.54266800 | -0.24126100 |
| H  | -2.40414000 | -4.63124900 | -0.23712900 |
| H  | -3.23581900 | -3.00374500 | -0.53509100 |
| C  | 0.05892600  | -3.66245200 | 0.47912300  |
| H  | 0.88812700  | -3.43985800 | -0.20838300 |
| H  | 0.39341500  | -3.36789600 | 1.48368800  |



|   |             |             |             |
|---|-------------|-------------|-------------|
| H | -0.10881200 | -4.74543500 | 0.47607600  |
| H | -1.79748900 | -1.05685200 | 3.66664100  |
| C | 3.84629700  | -0.81346500 | -0.58344200 |
| C | 4.36880700  | -1.45804100 | 0.54156600  |
| C | 3.65691900  | -1.44585800 | -1.81692700 |
| C | 4.72278500  | -2.80003700 | 0.40113600  |
| C | 4.02265000  | -2.78855200 | -1.90907900 |
| C | 4.55152900  | -3.45846500 | -0.81108400 |
| H | 5.14068800  | -3.32894600 | 1.25686200  |
| H | 3.89547300  | -3.30800600 | -2.85822000 |
| H | 4.83878300  | -4.50416500 | -0.90321200 |
| C | 1.02120200  | 3.06951800  | 0.22021800  |
| C | -0.04072400 | 3.18766500  | -0.68459000 |
| C | 1.03031000  | 3.68697500  | 1.47768700  |
| C | -1.12948800 | 3.97057600  | -0.29492400 |
| C | -0.06876700 | 4.47648600  | 1.81292700  |
| C | -1.13691900 | 4.61874500  | 0.93360500  |
| H | -1.97775800 | 4.06031200  | -0.97146100 |
| H | -0.08452600 | 4.97659900  | 2.78077800  |
| H | -1.98832000 | 5.23684100  | 1.21238600  |
| C | -5.35364600 | 0.14233600  | -0.93753700 |
| H | -5.65554400 | -0.87151500 | -1.21508000 |
| H | -5.07388000 | 0.20332500  | 0.11603800  |
| H | -6.14727900 | 0.85748600  | -1.17773900 |
| C | 2.16205400  | 3.48047800  | 2.43956400  |
| H | 3.09584200  | 3.94578200  | 2.09506500  |
| H | 1.92435000  | 3.91269600  | 3.41740200  |
| H | 2.37517700  | 2.41069600  | 2.58633900  |
| C | -0.04147900 | 2.49746400  | -2.01571600 |
| H | 0.94082600  | 2.53430100  | -2.50643800 |
| H | -0.30947500 | 1.43304100  | -1.91049600 |
| H | -0.78219300 | 2.94799900  | -2.68466700 |
| C | 4.52102300  | -0.74231200 | 1.84970200  |
| H | 5.07145500  | 0.20232800  | 1.74349600  |
| H | 3.54262200  | -0.49337100 | 2.28664200  |
| H | 5.05940800  | -1.36282600 | 2.57394500  |
| C | 3.07139000  | -0.71254500 | -2.98622800 |
| H | 2.05412800  | -0.35070600 | -2.76993200 |
| H | 3.66663600  | 0.16905800  | -3.26116700 |
| H | 3.01611200  | -1.36155900 | -3.86672700 |

### TS9a

Zero-point correction= 0.632644 (Hartree/Particle)

Thermal correction to Energy= 0.676584

Thermal correction to Enthalpy= 0.677528

Thermal correction to Gibbs Free Energy= 0.553246

Sum of electronic and zero-point Energies= -2180.332500

Sum of electronic and thermal Energies= -2180.288559

Sum of electronic and thermal Enthalpies= -2180.287615

Sum of electronic and thermal Free Energies= -2180.411897

M06/6-311++G(d,p)-SDD/SMD//M06/6-31G(d)-LANL2DZ energy in DCE solvent = -2181.83059489

Cartesian coordinates:

|   |             |             |            |
|---|-------------|-------------|------------|
| C | -3.73990600 | -1.76991200 | 2.18304300 |
| C | -4.77290200 | -2.45554900 | 1.38910400 |
| C | -2.62591200 | -1.21939100 | 1.66274900 |
| O | -4.84218100 | -2.35548000 | 0.17045800 |
| H | -3.89454900 | -1.68324300 | 3.25827000 |
| C | -1.60909400 | -0.46727000 | 2.45176800 |
| H | -1.51553800 | 0.55316900  | 2.04583800 |
| H | -1.89585400 | -0.40528500 | 3.50641500 |
| H | -0.61922900 | -0.94277700 | 2.37850800 |
| C | -5.75548200 | -3.28132300 | 2.17026900 |
| H | -6.46618300 | -3.76283200 | 1.49364900 |
| H | -5.23410700 | -4.04464400 | 2.76356400 |
| H | -6.30088500 | -2.64818400 | 2.88393200 |

|    |             |             |             |
|----|-------------|-------------|-------------|
| C  | -0.87367300 | -1.46224400 | -0.80376100 |
| C  | -2.11070400 | -0.74028600 | -0.75819200 |
| Au | 0.78395900  | -0.33705700 | -0.24953300 |
| N  | -2.30715600 | -1.40053200 | 0.31961700  |
| C  | 3.41969000  | 2.79564300  | 0.87313200  |
| C  | 4.34773200  | 1.81050600  | 0.77609000  |
| H  | 3.50676300  | 3.84252000  | 1.13311500  |
| H  | 5.41856600  | 1.81217200  | 0.93306500  |
| N  | 2.20125700  | 2.21955600  | 0.55692200  |
| N  | 3.67002600  | 0.65902400  | 0.40568300  |
| C  | 2.35146900  | 0.90646400  | 0.27192000  |
| C  | -0.81114100 | -2.80296300 | -1.39750200 |
| N  | -2.65530500 | 0.26526500  | -1.45053400 |
| C  | -2.02086300 | 0.72345100  | -2.69234000 |
| H  | -1.49693000 | 1.67126300  | -2.52180200 |
| H  | -1.30878900 | -0.04361000 | -3.01413000 |
| H  | -2.77905800 | 0.86209600  | -3.46964800 |
| S  | -3.97338000 | 1.22490800  | -0.81081200 |
| O  | -3.87643600 | 1.13299400  | 0.63112200  |
| O  | -3.87230700 | 2.48697800  | -1.51437800 |
| C  | -1.76161400 | -3.20049600 | -2.25738400 |
| H  | -1.71074900 | -4.16776800 | -2.75430500 |
| H  | -2.63279600 | -2.58542800 | -2.48593500 |
| C  | 0.36940400  | -3.64963700 | -1.03226300 |
| H  | 1.31614800  | -3.15570200 | -1.29743500 |
| H  | 0.39770600  | -3.82037500 | 0.05375200  |
| H  | 0.33657200  | -4.62442600 | -1.53082800 |
| C  | 4.26058200  | -0.63511000 | 0.19244500  |
| C  | 4.77738400  | -0.92553500 | -1.07411500 |
| C  | 4.25748800  | -1.54800800 | 1.25139200  |
| C  | 5.32475900  | -2.19357300 | -1.26546500 |
| C  | 4.81558800  | -2.80393000 | 1.01329900  |
| C  | 5.34481500  | -3.12304000 | -0.23167900 |
| H  | 5.73953400  | -2.44944500 | -2.23968500 |
| H  | 4.83576600  | -3.53539000 | 1.82036200  |
| H  | 5.78034900  | -4.10647100 | -0.39763700 |
| C  | 0.90578800  | 2.84366100  | 0.54694900  |
| C  | 0.39022300  | 3.28394100  | -0.67684200 |
| C  | 0.17917300  | 2.87071400  | 1.74194600  |
| C  | -0.92455900 | 3.75086100  | -0.68574300 |
| C  | -1.13067500 | 3.34812800  | 1.68452700  |
| C  | -1.68095500 | 3.77403400  | 0.48119600  |
| H  | -1.36366600 | 4.09859600  | -1.62112500 |
| H  | -1.72747900 | 3.37152700  | 2.59611000  |
| H  | -2.71060600 | 4.12377500  | 0.44695100  |
| C  | -5.37400300 | 0.31475900  | -1.40099100 |
| H  | -5.32997900 | -0.69815100 | -0.98013200 |
| H  | -6.26595300 | 0.84817200  | -1.05540300 |
| H  | -5.34286600 | 0.30877700  | -2.49516600 |
| C  | 0.77667900  | 2.38304700  | 3.02742300  |
| H  | 1.60310800  | 3.02449100  | 3.36376000  |
| H  | 0.02629700  | 2.36912300  | 3.82598200  |
| H  | 1.18573800  | 1.36643800  | 2.92840200  |
| C  | 1.20494700  | 3.22344100  | -1.93423700 |
| H  | 2.19779600  | 3.67480000  | -1.80518700 |
| H  | 1.37040700  | 2.18446000  | -2.25939700 |
| H  | 0.70122700  | 3.75315500  | -2.75076000 |
| C  | 3.65976100  | -1.20133500 | 2.58196800  |
| H  | 3.98867000  | -0.21700500 | 2.94230200  |
| H  | 2.56024200  | -1.17155000 | 2.53074400  |
| H  | 3.93375400  | -1.94461600 | 3.33852300  |
| C  | 4.73129400  | 0.08289100  | -2.18210600 |
| H  | 3.70245600  | 0.41795400  | -2.37989700 |
| H  | 5.31855100  | 0.98142700  | -1.94719000 |
| H  | 5.13079400  | -0.33876800 | -3.11052400 |

TS10a

Zero-point correction= 0.633398 (Hartree/Particle)  
 Thermal correction to Energy= 0.676722  
 Thermal correction to Enthalpy= 0.677666  
 Thermal correction to Gibbs Free Energy= 0.554320  
 Sum of electronic and zero-point Energies= -2180.331672  
 Sum of electronic and thermal Energies= -2180.288348  
 Sum of electronic and thermal Enthalpies= -2180.287404  
 Sum of electronic and thermal Free Energies= -2180.410750  
 M06/6-311++G(d,p)-SDD/SMD//M06/6-31G(d)-LANL2DZ energy in DCE solvent = -2181.83028756

Cartesian coordinates:

|    |             |             |             |
|----|-------------|-------------|-------------|
| C  | -1.07262400 | -1.76993800 | -0.10595200 |
| C  | -2.43896100 | -1.26184500 | 0.00419900  |
| N  | -3.06725900 | -1.32275100 | -1.27203600 |
| S  | -3.38373700 | 0.18676300  | -2.02470600 |
| O  | -2.31520000 | 1.07646500  | -1.59994500 |
| O  | -3.60876500 | -0.11863700 | -3.42361700 |
| Au | 0.35711200  | -0.28928500 | -0.02061100 |
| C  | 1.89659200  | 1.09794800  | -0.03646300 |
| N  | 1.87986400  | 2.44289100  | 0.07577800  |
| C  | 3.98912500  | 1.90779800  | -0.24447700 |
| C  | 3.15788500  | 2.96145700  | -0.05156100 |
| H  | 5.05996000  | 1.85065800  | -0.39101500 |
| H  | 3.34320900  | 4.02635000  | 0.00269700  |
| N  | 3.19563600  | 0.77429400  | -0.23109100 |
| N  | -2.96820700 | -0.55103400 | 0.91458800  |
| C  | -2.34202500 | -0.04974700 | 2.04980600  |
| C  | -1.88847300 | -2.20134600 | 3.24810000  |
| C  | -1.90311900 | -0.74446800 | 3.12605900  |
| C  | -2.33900000 | 1.44644100  | 2.02809800  |
| H  | -1.83905800 | 1.86128000  | 2.91038000  |
| H  | -1.82867300 | 1.81083300  | 1.12365900  |
| H  | -3.36751400 | 1.83137900  | 1.98630900  |
| O  | -1.96719500 | -2.93657600 | 2.26934300  |
| C  | -1.76339800 | -2.75582100 | 4.63886400  |
| H  | -2.61655000 | -2.44014400 | 5.25452100  |
| H  | -1.71942800 | -3.84768300 | 4.60908800  |
| H  | -0.86139600 | -2.36374400 | 5.12823200  |
| C  | -3.78410100 | -2.49877600 | -1.74029400 |
| H  | -3.08618100 | -3.33648400 | -1.88552500 |
| H  | -4.56483900 | -2.79982500 | -1.02809800 |
| H  | -4.22720200 | -2.27109200 | -2.71412100 |
| H  | -1.61503400 | -0.16617100 | 4.00462000  |
| C  | 3.66151700  | -0.57193900 | -0.42732300 |
| C  | 4.02116000  | -1.32137000 | 0.69744300  |
| C  | 3.70798600  | -1.06985700 | -1.73363000 |
| C  | 4.44921800  | -2.63141200 | 0.48155500  |
| C  | 4.14512400  | -2.38396200 | -1.90088100 |
| C  | 4.51223300  | -3.15663700 | -0.80467500 |
| H  | 4.74213100  | -3.23993600 | 1.33630900  |
| H  | 4.19884700  | -2.79964900 | -2.90651800 |
| H  | 4.85669400  | -4.17816200 | -0.95459900 |
| C  | 0.69894000  | 3.24562000  | 0.24832600  |
| C  | -0.05485000 | 3.56999000  | -0.88343400 |
| C  | 0.37928700  | 3.67843700  | 1.53995500  |
| C  | -1.17231700 | 4.38429800  | -0.68987300 |
| C  | -0.73849800 | 4.49852900  | 1.68155900  |
| C  | -1.50516700 | 4.85097800  | 0.57526400  |
| H  | -1.78039000 | 4.65412300  | -1.55240600 |
| H  | -1.00940800 | 4.85843700  | 2.67391700  |
| H  | -2.37220900 | 5.49653800  | 0.70274000  |
| C  | -4.91998700 | 0.73133200  | -1.30789900 |
| H  | -5.68909300 | -0.01610100 | -1.52848900 |
| H  | -4.77594400 | 0.84300100  | -0.22980700 |
| H  | -5.17853400 | 1.68372400  | -1.78194300 |
| C  | 1.18455200  | 3.23978200  | 2.72588800  |
| H  | 2.22932700  | 3.57534100  | 2.67219800  |

|   |             |             |             |
|---|-------------|-------------|-------------|
| H | 0.75879600  | 3.63557900  | 3.65466800  |
| H | 1.20789800  | 2.14146200  | 2.80567800  |
| C | 0.29120600  | 3.04300600  | -2.24233600 |
| H | 1.37506000  | 3.01170800  | -2.41815200 |
| H | -0.10127900 | 2.02255200  | -2.36909000 |
| H | -0.16153000 | 3.66090300  | -3.02555600 |
| C | 3.93397500  | -0.74361600 | 2.07775100  |
| H | 4.50317600  | 0.19142400  | 2.17007300  |
| H | 2.89411300  | -0.51095600 | 2.35144400  |
| H | 4.32527300  | -1.44676200 | 2.82065200  |
| C | 3.27972300  | -0.23255200 | -2.90087700 |
| H | 2.21375000  | 0.03477500  | -2.83633300 |
| H | 3.83814100  | 0.71190800  | -2.95941300 |
| H | 3.43315400  | -0.76809900 | -3.84381300 |
| C | -0.72466100 | -3.10584600 | -0.48373000 |
| C | -1.56464700 | -4.13901400 | -0.20819700 |
| H | -2.50831700 | -3.99204900 | 0.30924900  |
| C | 0.63435400  | -3.35441400 | -1.08156400 |
| H | 1.43390300  | -3.08660000 | -0.37566900 |
| H | 0.78632700  | -2.74821700 | -1.98457200 |
| H | 0.76165300  | -4.40827100 | -1.35473500 |
| H | -1.26816300 | -5.16891400 | -0.40813500 |

### TS11a

Zero-point correction= 0.633169 (Hartree/Particle)

Thermal correction to Energy= 0.676446

Thermal correction to Enthalpy= 0.677390

Thermal correction to Gibbs Free Energy= 0.555668

Sum of electronic and zero-point Energies= -2180.324909

Sum of electronic and thermal Energies= -2180.281632

Sum of electronic and thermal Enthalpies= -2180.280688

Sum of electronic and thermal Free Energies= -2180.402409

M06/6-311++G(d,p)-SDD/SMD//M06/6-31G(d)-LANL2DZ energy in DCE solvent = -2181.81954018

Cartesian coordinates:

|    |             |             |             |
|----|-------------|-------------|-------------|
| C  | -1.60324400 | 0.44980500  | 0.63847300  |
| C  | -2.21523900 | -0.49063500 | -0.31139300 |
| N  | -1.88287800 | -1.81226700 | -0.28386800 |
| S  | -1.61000600 | -2.72132300 | -1.72019200 |
| O  | -0.67372400 | -2.00912800 | -2.56496400 |
| O  | -1.31079000 | -4.05276700 | -1.22718500 |
| Au | 0.45570700  | 0.25505000  | 0.49571200  |
| C  | 2.45572100  | -0.02173900 | 0.10357500  |
| N  | 3.25512800  | 0.82886000  | -0.57170000 |
| C  | 4.45709400  | -0.98225900 | -0.24064800 |
| C  | 4.49698800  | 0.25550500  | -0.79477800 |
| H  | 5.19854100  | -1.76831700 | -0.18215700 |
| H  | 5.27989200  | 0.78181800  | -1.32483700 |
| N  | 3.19340900  | -1.13251700 | 0.30674200  |
| N  | -2.09937800 | 0.25376000  | -1.43297400 |
| C  | -2.96848200 | 1.22174700  | -1.77498900 |
| C  | -4.82480400 | 0.26045800  | -0.51766900 |
| C  | -4.27510500 | 1.29176600  | -1.31841100 |
| C  | -2.43874500 | 2.18279100  | -2.78709400 |
| H  | -1.50795000 | 2.63151400  | -2.41020600 |
| H  | -2.17288300 | 1.64550800  | -3.70705700 |
| H  | -3.15509500 | 2.97384200  | -3.02847600 |
| O  | -4.11696100 | -0.63567200 | 0.02898000  |
| C  | -6.30317500 | 0.16736300  | -0.31400600 |
| H  | -6.52732100 | 0.19106400  | 0.76048300  |
| H  | -6.84885600 | 0.97264300  | -0.81459900 |
| H  | -6.66438400 | -0.79948800 | -0.68649800 |
| C  | -1.77682200 | -2.50483600 | 1.00241600  |
| H  | -2.05054400 | -1.79181800 | 1.78828500  |
| H  | -2.47226400 | -3.34916600 | 1.03850500  |
| H  | -0.75442200 | -2.86333500 | 1.17522100  |

|   |             |             |             |
|---|-------------|-------------|-------------|
| C | -2.25334700 | 1.52704100  | 1.32706600  |
| C | -3.37733200 | 1.28995200  | 2.04280300  |
| H | -3.90523200 | 0.34143200  | 1.99702300  |
| C | -1.51946300 | 2.83542200  | 1.41140900  |
| H | -1.27954700 | 3.20790700  | 0.40513700  |
| H | -2.11872200 | 3.59390000  | 1.92740900  |
| H | -4.94082700 | 2.04641500  | -1.72865300 |
| C | 2.66275300  | -2.31517000 | 0.93217500  |
| C | 2.66203500  | -2.38648800 | 2.32879400  |
| C | 2.12161700  | -3.30745300 | 0.10657500  |
| C | 2.08842900  | -3.51787500 | 2.90898000  |
| C | 1.54918500  | -4.41622700 | 0.73256900  |
| C | 1.53621300  | -4.52077600 | 2.11931100  |
| H | 2.08069500  | -3.60875700 | 3.99465200  |
| H | 1.10498100  | -5.19678300 | 0.11643900  |
| H | 1.09280200  | -5.39616600 | 2.59053400  |
| C | 2.81733600  | 2.12624900  | -1.01162400 |
| C | 2.03504600  | 2.21366800  | -2.16878800 |
| C | 3.15251500  | 3.23312500  | -0.22315300 |
| C | 1.60244700  | 3.48682800  | -2.54690900 |
| C | 2.69302300  | 4.48149800  | -0.63890000 |
| C | 1.92784400  | 4.60772500  | -1.79326700 |
| H | 1.01104300  | 3.59206200  | -3.45673600 |
| H | 2.94264400  | 5.36175900  | -0.04773700 |
| H | 1.58614900  | 5.59135300  | -2.11030900 |
| C | -3.21291900 | -2.72208500 | -2.48962200 |
| H | -3.94163600 | -3.11645000 | -1.77505100 |
| H | -3.46199300 | -1.70048000 | -2.79185700 |
| H | -3.14214800 | -3.37258900 | -3.36755200 |
| C | 3.95494500  | 3.07504100  | 1.03302900  |
| H | 4.97269600  | 2.71334400  | 0.83190700  |
| H | 4.04381300  | 4.02980600  | 1.56213400  |
| H | 3.49031700  | 2.35066800  | 1.71851500  |
| C | 1.63421600  | 1.00517000  | -2.96164300 |
| H | 2.41214400  | 0.23045700  | -2.97253300 |
| H | 0.72233300  | 0.53781700  | -2.55281100 |
| H | 1.41896300  | 1.27932800  | -4.00110500 |
| C | 3.23927700  | -1.28614900 | 3.16757300  |
| H | 4.24281300  | -0.99359000 | 2.83003800  |
| H | 2.61456700  | -0.38129700 | 3.13062700  |
| H | 3.31427000  | -1.59361500 | 4.21622400  |
| C | 2.15939600  | -3.19029300 | -1.38657100 |
| H | 1.78797700  | -2.21645900 | -1.73504300 |
| H | 3.18164600  | -3.30926400 | -1.77355600 |
| H | 1.53303300  | -3.95941000 | -1.85118400 |
| H | -3.73193600 | 2.02549600  | 2.76488600  |
| H | -0.56364500 | 2.72288100  | 1.94162700  |

### TS12a

Zero-point correction= 0.694308 (Hartree/Particle)

Thermal correction to Energy= 0.749807

Thermal correction to Enthalpy= 0.750751

Thermal correction to Gibbs Free Energy= 0.606781

Sum of electronic and zero-point Energies= -4007.233943

Sum of electronic and thermal Energies= -4007.178444

Sum of electronic and thermal Enthalpies= -4007.177499

Sum of electronic and thermal Free Energies= -4007.321469

M06/6-311++G(d,p)-SDD/SMD//M06/6-31G(d)-LANL2DZ energy in DCE solvent = -4009.10011511

Cartesian coordinates:

|   |             |             |             |
|---|-------------|-------------|-------------|
| H | -2.96562500 | 1.19271000  | -0.16207600 |
| N | -3.44335700 | 0.14450800  | 0.48971000  |
| S | -4.23622700 | -0.91418300 | -0.49521500 |
| O | -4.20320600 | -0.31189300 | -1.81937000 |
| O | -3.87233400 | -2.30212900 | -0.29863000 |
| S | -3.07529300 | -0.19207100 | 2.07263500  |

|    |             |             |             |
|----|-------------|-------------|-------------|
| O  | -3.33278800 | 0.98439500  | 2.87775100  |
| O  | -3.51789100 | -1.50918800 | 2.48126500  |
| C  | -1.24309900 | -0.31291600 | 1.95884700  |
| C  | -5.99663000 | -0.72403700 | 0.03789100  |
| F  | -0.76591900 | -0.66911200 | 3.13980900  |
| F  | -0.93257000 | -1.23096400 | 1.05873100  |
| F  | -0.71917200 | 0.85174600  | 1.61321300  |
| F  | -6.72428000 | -1.56975100 | -0.67263700 |
| F  | -6.38824000 | 0.51198300  | -0.20476900 |
| F  | -6.13000100 | -0.99035900 | 1.32208800  |
| C  | -2.60994300 | 2.30515200  | -0.98483500 |
| C  | -4.03452100 | 2.80925700  | -1.09100100 |
| C  | -1.76005600 | 2.97940300  | -0.05297400 |
| O  | -4.64844700 | 3.19783500  | -0.11626200 |
| C  | -2.27358500 | 3.59794100  | 1.20631200  |
| H  | -1.42354700 | 3.88935700  | 1.83382600  |
| H  | -2.88641500 | 4.47908100  | 0.96889400  |
| H  | -2.93914000 | 2.92724700  | 1.75771300  |
| C  | -4.68218500 | 2.81605600  | -2.45333000 |
| H  | -5.64219400 | 3.33314500  | -2.36838100 |
| H  | -4.05629300 | 3.31411700  | -3.20528600 |
| H  | -4.85736100 | 1.78750600  | -2.79348200 |
| C  | 0.26237000  | 1.06631600  | -1.32101000 |
| C  | 0.43227700  | 2.43048500  | -0.87508300 |
| Au | 1.59404500  | -0.39760600 | -0.66901300 |
| N  | -0.45667500 | 3.15989200  | -0.24113800 |
| C  | 4.47745400  | -2.96985700 | 1.15586800  |
| C  | 3.51327800  | -3.88728800 | 0.89570100  |
| H  | 5.44102400  | -3.05655700 | 1.64036400  |
| H  | 3.45276400  | -4.94662900 | 1.10755300  |
| N  | 4.01300800  | -1.75947500 | 0.66422600  |
| N  | 2.48865400  | -3.21328100 | 0.24967000  |
| C  | 2.78955400  | -1.90184300 | 0.10679400  |
| C  | -0.89908200 | 0.75983600  | -1.95317500 |
| N  | 1.68188000  | 3.03930500  | -0.98195300 |
| C  | 2.72373000  | 2.50680700  | -1.86146000 |
| H  | 3.39187600  | 1.80325400  | -1.34407600 |
| H  | 2.22747900  | 1.98847900  | -2.68552100 |
| H  | 3.31759000  | 3.33772700  | -2.25195100 |
| S  | 2.24848700  | 4.02606700  | 0.31222700  |
| O  | 1.94543300  | 3.37905000  | 1.57846700  |
| O  | 3.62786100  | 4.33150400  | -0.04014700 |
| C  | -1.92179800 | 1.83545100  | -2.26154200 |
| H  | -2.66560600 | 1.43988600  | -2.95842900 |
| H  | -1.43577600 | 2.69337000  | -2.75936700 |
| C  | -1.20702100 | -0.65577700 | -2.35435800 |
| H  | -0.32896300 | -1.12208000 | -2.82079900 |
| H  | -1.44776500 | -1.27515900 | -1.47355400 |
| H  | -2.05601600 | -0.72718900 | -3.04128500 |
| C  | 1.22546100  | -3.75278500 | -0.17487400 |
| C  | 1.03750300  | -4.01796400 | -1.53486500 |
| C  | 0.20896500  | -3.88047800 | 0.77690700  |
| C  | -0.23558600 | -4.41828500 | -1.93941200 |
| C  | -1.05366400 | -4.26145600 | 0.32406200  |
| C  | -1.27565100 | -4.52191500 | -1.02256500 |
| H  | -0.41279200 | -4.62655800 | -2.99455900 |
| H  | -1.87952700 | -4.31087100 | 1.03341100  |
| H  | -2.27417300 | -4.79305100 | -1.35939500 |
| C  | 4.70249300  | -0.49933900 | 0.65753800  |
| C  | 5.65566900  | -0.28552400 | -0.34434000 |
| C  | 4.31325000  | 0.48864400  | 1.56852900  |
| C  | 6.24912500  | 0.97403800  | -0.41106100 |
| C  | 4.92549100  | 1.73757200  | 1.45539500  |
| C  | 5.87992800  | 1.97944600  | 0.47579300  |
| H  | 6.99081700  | 1.16945300  | -1.18541400 |
| H  | 4.61766600  | 2.53690600  | 2.12793000  |
| H  | 6.32067300  | 2.97068500  | 0.39158300  |
| C  | 1.33229100  | 5.54705700  | 0.18095900  |

|   |             |             |             |
|---|-------------|-------------|-------------|
| H | 0.28734600  | 5.36228800  | 0.43342100  |
| H | 1.80511400  | 6.23846900  | 0.88657700  |
| H | 1.43600000  | 5.92051200  | -0.84176200 |
| C | 3.24070000  | 0.25433700  | 2.58898200  |
| H | 3.27874600  | -0.75997400 | 3.00863000  |
| H | 3.32426700  | 0.97431000  | 3.41045700  |
| H | 2.24182400  | 0.39120800  | 2.14429200  |
| C | 5.97968900  | -1.35648100 | -1.34248800 |
| H | 6.44740600  | -2.23551500 | -0.87746400 |
| H | 5.07102100  | -1.71317100 | -1.85124900 |
| H | 6.66861400  | -0.98048400 | -2.10709500 |
| C | 0.45384100  | -3.57385100 | 2.22329700  |
| H | 1.06060400  | -4.35157100 | 2.70874000  |
| H | 0.98742400  | -2.62103000 | 2.35117400  |
| H | -0.49463600 | -3.50153200 | 2.76805700  |
| C | 2.14473200  | -3.83282900 | -2.52861500 |
| H | 2.32072600  | -2.76480400 | -2.73177100 |
| H | 3.09663400  | -4.25025100 | -2.17240700 |
| H | 1.89734300  | -4.31558400 | -3.48104900 |

### TS13a

Zero-point correction= 0.692360 (Hartree/Particle)

Thermal correction to Energy= 0.748621

Thermal correction to Enthalpy= 0.749565

Thermal correction to Gibbs Free Energy= 0.602626

Sum of electronic and zero-point Energies= -4007.236264

Sum of electronic and thermal Energies= -4007.180003

Sum of electronic and thermal Enthalpies= -4007.179059

Sum of electronic and thermal Free Energies= -4007.325998

M06/6-311++G(d,p)-SDD/SMD//M06/6-31G(d)-LANL2DZ energy in DCE solvent = -4009.11216323

Cartesian coordinates:

|    |             |             |             |
|----|-------------|-------------|-------------|
| H  | -1.20589600 | 0.16639400  | -0.05676700 |
| N  | -1.72977100 | 0.36164900  | -1.22679400 |
| S  | -0.87541100 | -0.23401100 | -2.48877800 |
| O  | 0.07515600  | -1.17477300 | -1.91429200 |
| O  | -1.69839900 | -0.56088100 | -3.63211300 |
| S  | -2.98061400 | 1.42347900  | -1.38625200 |
| O  | -3.33600600 | 1.80494900  | -0.03044000 |
| O  | -2.72520700 | 2.41570600  | -2.41365700 |
| C  | -4.40031300 | 0.38622100  | -2.00031500 |
| C  | 0.18320200  | 1.20928800  | -3.02352200 |
| F  | -5.51496100 | 0.97423700  | -1.58862700 |
| F  | -4.39730700 | 0.32906900  | -3.31316100 |
| F  | -4.32197600 | -0.82271100 | -1.48892500 |
| F  | 1.32094700  | 0.72528900  | -3.51628200 |
| F  | 0.46924900  | 1.97742900  | -1.97646700 |
| F  | -0.40853800 | 1.92791100  | -3.94830200 |
| C  | -3.38811100 | 0.42156700  | 2.87645200  |
| C  | -4.39061400 | 1.43517200  | 3.25266500  |
| C  | -3.69586400 | -0.62596100 | 2.03450900  |
| O  | -5.56948900 | 1.34795300  | 2.94175600  |
| C  | -5.06058600 | -0.87746000 | 1.46918400  |
| H  | -5.02116500 | -1.76177200 | 0.82372800  |
| H  | -5.80699900 | -1.01703200 | 2.25938200  |
| H  | -5.40231200 | -0.01106300 | 0.89098100  |
| C  | -3.94047100 | 2.61937400  | 4.08696700  |
| H  | -4.79183100 | 3.29649300  | 4.19704200  |
| H  | -3.61258400 | 2.29941100  | 5.08617600  |
| H  | -3.10380100 | 3.16551500  | 3.63110400  |
| C  | -0.85295200 | -0.17030500 | 1.26118900  |
| C  | -1.53489900 | -1.45652200 | 1.42913400  |
| Au | 1.20037300  | 0.08714200  | 0.62757100  |
| N  | -2.79582900 | -1.60158900 | 1.70645000  |
| C  | 5.41143100  | 0.00878000  | -0.07122800 |
| C  | 5.22841800  | 1.34577400  | 0.04193900  |

|   |             |             |             |
|---|-------------|-------------|-------------|
| H | 6.29810300  | -0.58728100 | -0.24287200 |
| H | 5.92018300  | 2.17611900  | -0.01011500 |
| N | 4.16257900  | -0.57653500 | 0.07196700  |
| N | 3.87284300  | 1.54147300  | 0.25479400  |
| C | 3.20793600  | 0.36149100  | 0.26837200  |
| C | -1.18115400 | 0.83554900  | 2.14663200  |
| N | -0.88180400 | -2.63939600 | 1.04385900  |
| C | 0.51942400  | -2.90821900 | 1.33387100  |
| H | 1.17356700  | -2.71997900 | 0.47210000  |
| H | 0.82302700  | -2.27783800 | 2.17754600  |
| H | 0.63957600  | -3.95744700 | 1.62922800  |
| S | -1.66249900 | -3.72732200 | -0.00935700 |
| O | -2.48436500 | -2.98557700 | -0.94587000 |
| O | -0.60465600 | -4.61621900 | -0.46880900 |
| C | -1.96756000 | 0.51212500  | 3.37835900  |
| H | -1.84858300 | 1.28030300  | 4.14983200  |
| H | -1.64274200 | -0.45102000 | 3.80217200  |
| C | -0.87315100 | 2.27270800  | 1.88561400  |
| H | -0.38068200 | 2.42705700  | 0.91631100  |
| H | -1.80468500 | 2.85631100  | 1.88553000  |
| H | -0.22500700 | 2.68460500  | 2.67541900  |
| C | 3.22206300  | 2.81363600  | 0.38851400  |
| C | 2.89469900  | 3.26722000  | 1.67032400  |
| C | 2.90707900  | 3.51650000  | -0.77831800 |
| C | 2.21684900  | 4.48191800  | 1.76553500  |
| C | 2.21785100  | 4.72058300  | -0.63514600 |
| C | 1.87488800  | 5.19811500  | 0.62390800  |
| H | 1.94951900  | 4.86226100  | 2.75151500  |
| H | 1.94337200  | 5.28182100  | -1.52767200 |
| H | 1.33451300  | 6.13843400  | 0.71645600  |
| C | 3.90374900  | -1.98920200 | 0.02401900  |
| C | 4.02961900  | -2.72135000 | 1.20986600  |
| C | 3.51215200  | -2.55538900 | -1.19219100 |
| C | 3.75428500  | -4.08619300 | 1.15302500  |
| C | 3.23107800  | -3.92312100 | -1.19735300 |
| C | 3.35213900  | -4.67999400 | -0.03952800 |
| H | 3.84332900  | -4.68299100 | 2.06074500  |
| H | 2.89990000  | -4.38919000 | -2.12406900 |
| H | 3.12028600  | -5.74306100 | -0.06445200 |
| C | -2.73344500 | -4.66799500 | 1.05993500  |
| H | -3.44826100 | -3.97596500 | 1.51250300  |
| H | -3.23343900 | -5.41610900 | 0.43627600  |
| H | -2.11702500 | -5.15703700 | 1.82088300  |
| C | 3.35327400  | -1.72752400 | -2.42900300 |
| H | 4.12879600  | -0.95441000 | -2.51794900 |
| H | 3.39372100  | -2.35707200 | -3.32492400 |
| H | 2.37670600  | -1.22410200 | -2.42893400 |
| C | 4.40931800  | -2.04937500 | 2.49527800  |
| H | 5.39249500  | -1.56173300 | 2.43489400  |
| H | 3.68488600  | -1.26555500 | 2.76515900  |
| H | 4.44534900  | -2.77197900 | 3.31819300  |
| C | 3.29978800  | 2.99836700  | -2.12854800 |
| H | 4.36004800  | 3.19850600  | -2.34145700 |
| H | 3.15200300  | 1.91384300  | -2.21282200 |
| H | 2.71006800  | 3.47901600  | -2.91731900 |
| C | 3.22620500  | 2.46546200  | 2.89266300  |
| H | 2.55308600  | 1.59912000  | 2.99028000  |
| H | 4.25016800  | 2.06806300  | 2.86406100  |
| H | 3.12216100  | 3.07387100  | 3.79843400  |

#### INT1b

|                                            |                             |
|--------------------------------------------|-----------------------------|
| Zero-point correction=                     | 0.584952 (Hartree/Particle) |
| Thermal correction to Energy=              | 0.622824                    |
| Thermal correction to Enthalpy=            | 0.623768                    |
| Thermal correction to Gibbs Free Energy=   | 0.512863                    |
| Sum of electronic and zero-point Energies= | -1972.551857                |
| Sum of electronic and thermal Energies=    | -1972.513985                |



Sum of electronic and thermal Enthalpies= -1972.513041  
Sum of electronic and thermal Free Energies= -1972.623946  
M06/6-311++G(d,p)-SDD/SMD//M06/6-31G(d)-LANL2DZ energy in DCE solvent = -1973.94130091

Cartesian coordinates:

|    |             |             |             |
|----|-------------|-------------|-------------|
| C  | -0.83142700 | 2.10046800  | -0.64567700 |
| C  | 0.35462600  | 2.50323300  | -0.51822800 |
| N  | 1.60686300  | 2.82331600  | -0.30247700 |
| S  | 2.15779900  | 2.79513500  | 1.38181400  |
| O  | 1.13412200  | 2.09788400  | 2.13422700  |
| O  | 3.53183300  | 2.33664500  | 1.32936400  |
| Au | -0.14628600 | 0.04867800  | -0.29106500 |
| C  | 0.31187800  | -1.89673400 | 0.09475900  |
| N  | 1.51174700  | -2.50233800 | -0.00333800 |
| C  | 0.12068800  | -4.03937900 | 0.73622100  |
| C  | 1.41511100  | -3.82831000 | 0.39001300  |
| H  | -0.39343000 | -4.91909100 | 1.10068400  |
| H  | 2.27570200  | -4.48445000 | 0.38613000  |
| N  | -0.54128800 | -2.83663300 | 0.54649400  |
| C  | 2.63506300  | 2.62068400  | -1.34440400 |
| H  | 2.20018600  | 2.91906300  | -2.30138300 |
| H  | 3.50403200  | 3.24687400  | -1.12492700 |
| H  | 2.94426000  | 1.56636500  | -1.37628400 |
| C  | -1.92940100 | -2.56512300 | 0.80922900  |
| C  | -2.85472900 | -2.80273000 | -0.21257400 |
| C  | -2.27163000 | -2.01982700 | 2.05094200  |
| C  | -4.18741200 | -2.48527200 | 0.04669300  |
| C  | -3.61781600 | -1.72100000 | 2.26528900  |
| C  | -4.56515400 | -1.95138900 | 1.27425900  |
| H  | -4.93403700 | -2.66278500 | -0.72664200 |
| H  | -3.91971700 | -1.30364200 | 3.22517500  |
| H  | -5.61123100 | -1.71589700 | 1.46184900  |
| C  | 2.70279900  | -1.83102800 | -0.45172900 |
| C  | 3.43139500  | -1.08042900 | 0.47724600  |
| C  | 3.04556900  | -1.93358200 | -1.80436000 |
| C  | 4.56673200  | -0.41661800 | 0.00804700  |
| C  | 4.18992200  | -1.25712900 | -2.22541400 |
| C  | 4.94454600  | -0.50959300 | -1.32678700 |
| H  | 5.15118600  | 0.18134800  | 0.70531100  |
| H  | 4.48962200  | -1.32381500 | -3.27067500 |
| H  | 5.83942100  | 0.00572500  | -1.67147000 |
| C  | 2.11195500  | 4.52737500  | 1.77285600  |
| H  | 2.45905500  | 4.63672600  | 2.80549100  |
| H  | 2.78080400  | 5.05818500  | 1.08859400  |
| H  | 1.08048800  | 4.87852200  | 1.67665200  |
| C  | 3.00558700  | -0.97787800 | 1.91091700  |
| H  | 2.77907700  | -1.96147500 | 2.34526100  |
| H  | 3.78978600  | -0.50927200 | 2.51484600  |
| H  | 2.10076400  | -0.36024600 | 2.02158000  |
| C  | 2.20978100  | -2.73036200 | -2.76020500 |
| H  | 2.20992400  | -3.80120300 | -2.51376800 |
| H  | 1.16004000  | -2.40192000 | -2.75101200 |
| H  | 2.58408600  | -2.62881000 | -3.78438200 |
| C  | -2.42374800 | -3.35058800 | -1.53950500 |
| H  | -1.94399200 | -4.33438100 | -1.44532400 |
| H  | -3.28026500 | -3.46321600 | -2.21259400 |
| H  | -1.69531700 | -2.68800500 | -2.03099600 |
| C  | -1.23398800 | -1.73084800 | 3.09396800  |
| H  | -0.50768300 | -2.54779700 | 3.19967100  |
| H  | -0.66074200 | -0.82393300 | 2.84507000  |

|   |             |             |             |
|---|-------------|-------------|-------------|
| H | -1.69923900 | -1.56509600 | 4.07164000  |
| C | -2.23457100 | 2.38056300  | -0.85213600 |
| C | -2.63793600 | 3.65664600  | -1.00934600 |
| C | -3.20096100 | 1.22114300  | -0.85374400 |
| C | -4.06817800 | 4.05791300  | -1.15246700 |
| H | -1.88544000 | 4.44751000  | -1.02794200 |
| C | -4.57753200 | 1.62047800  | -1.36955400 |
| H | -2.78838000 | 0.40100600  | -1.46490700 |
| C | -5.02316100 | 2.93905000  | -0.75279200 |
| H | -4.25080000 | 4.96559500  | -0.55861800 |
| H | -5.29985600 | 0.82136100  | -1.15753800 |
| H | -5.03305600 | 2.84326500  | 0.34460400  |
| H | -4.24648900 | 4.36019300  | -2.19933500 |
| H | -6.04679800 | 3.19016700  | -1.05714200 |
| H | -4.53960300 | 1.72932700  | -2.46543000 |
| H | -3.27752500 | 0.81106400  | 0.17032900  |

## INT2b

|                                                                         |                             |
|-------------------------------------------------------------------------|-----------------------------|
| Zero-point correction=                                                  | 0.701745 (Hartree/Particle) |
| Thermal correction to Energy=                                           | 0.746992                    |
| Thermal correction to Enthalpy=                                         | 0.747936                    |
| Thermal correction to Gibbs Free Energy=                                | 0.619199                    |
| Sum of electronic and zero-point Energies=                              | -2296.923982                |
| Sum of electronic and thermal Energies=                                 | -2296.878735                |
| Sum of electronic and thermal Enthalpies=                               | -2296.877791                |
| Sum of electronic and thermal Free Energies=                            | -2297.006529                |
| M06/6-311++G(d,p)-SDD/SMD//M06/6-31G(d)-LANL2DZ energy in DCE solvent = | -2298.51942953              |

Cartesian coordinates:

|    |             |             |             |
|----|-------------|-------------|-------------|
| C  | 5.81479500  | 0.34928900  | 0.36845900  |
| C  | 5.80816100  | -0.45725400 | -0.73330600 |
| C  | 4.48444000  | 0.39210300  | 0.82702300  |
| N  | 3.75187100  | -0.35337500 | 0.00910500  |
| O  | 4.56123100  | -0.89144600 | -0.97620400 |
| H  | 6.66717400  | 0.84211500  | 0.81704400  |
| C  | 6.86044200  | -0.93306800 | -1.65161000 |
| H  | 6.63476800  | -0.64502200 | -2.68537700 |
| H  | 7.82713000  | -0.50682700 | -1.37017800 |
| H  | 6.93565500  | -2.02687900 | -1.62136700 |
| C  | 3.90564600  | 1.13234900  | 1.96554000  |
| H  | 3.54007600  | 2.10556200  | 1.60668500  |
| H  | 3.06484500  | 0.57982000  | 2.40035900  |
| H  | 4.67008800  | 1.31038000  | 2.72764200  |
| C  | 1.46752200  | 0.40524800  | -0.29096900 |
| C  | 2.34019200  | -0.60660500 | -0.10579400 |
| N  | 2.05438900  | -1.99121000 | 0.00891800  |
| S  | 1.68975200  | -2.52158100 | 1.58323100  |
| O  | 2.32038900  | -1.56517900 | 2.48390700  |
| O  | 0.27302500  | -2.83833100 | 1.70141300  |
| Au | -0.58836800 | 0.11202900  | -0.16642700 |
| C  | -2.64926500 | 0.00181300  | -0.04965700 |
| N  | -3.46993300 | -1.05164100 | -0.24583100 |
| C  | -4.79558200 | 0.63840800  | 0.22534300  |
| C  | -4.79631400 | -0.68189600 | -0.08146000 |
| H  | -5.60098900 | 1.33052500  | 0.43392000  |
| H  | -5.60261100 | -1.39438800 | -0.19776300 |
| N  | -3.46792600 | 1.03870600  | 0.23923700  |
| C  | 1.28878200  | -2.63786400 | -1.06043600 |
| H  | 1.70696000  | -2.30393800 | -2.01508500 |
| H  | 1.40411000  | -3.72674100 | -0.99431400 |

|   |             |             |             |
|---|-------------|-------------|-------------|
| H | 0.21644900  | -2.39713800 | -1.02237200 |
| C | 1.88796800  | 1.78932700  | -0.54392300 |
| C | 2.78572700  | 2.11252900  | -1.49449400 |
| H | 3.26028400  | 1.31083900  | -2.06753700 |
| C | 1.15970400  | 2.85814000  | 0.24227900  |
| H | 0.12061500  | 2.92801000  | -0.12952700 |
| H | 1.06031400  | 2.54647300  | 1.29591000  |
| C | -2.98912600 | 2.37053300  | 0.49036400  |
| C | -2.76417800 | 3.21154700  | -0.60440900 |
| C | -2.72541500 | 2.74488200  | 1.81202700  |
| C | -2.26623500 | 4.48859800  | -0.34142500 |
| C | -2.23133100 | 4.03129300  | 2.02795600  |
| C | -2.00713100 | 4.89604000  | 0.96252700  |
| H | -2.08753900 | 5.16873300  | -1.17417100 |
| H | -2.02390700 | 4.35336500  | 3.04782500  |
| H | -1.62984900 | 5.89996700  | 1.15073600  |
| C | -3.00027100 | -2.36227000 | -0.60364900 |
| C | -2.68270800 | -3.25746300 | 0.42118300  |
| C | -2.85297100 | -2.65982200 | -1.96291300 |
| C | -2.20149900 | -4.51182200 | 0.04412400  |
| C | -2.37322100 | -3.92672300 | -2.29201800 |
| C | -2.05148300 | -4.84414400 | -1.29650200 |
| H | -1.94100900 | -5.22893200 | 0.82172900  |
| H | -2.25676200 | -4.19280900 | -3.34220500 |
| H | -1.68485900 | -5.83187000 | -1.57140900 |
| C | 2.59523200  | -4.05234800 | 1.67948800  |
| H | 2.41490400  | -4.46291000 | 2.67798200  |
| H | 2.22615900  | -4.75115700 | 0.92341100  |
| H | 3.65832500  | -3.84199300 | 1.53726300  |
| C | -2.82678700 | -2.87239900 | 1.86070900  |
| H | -3.82913500 | -2.48391000 | 2.08682400  |
| H | -2.63859500 | -3.73157200 | 2.51338200  |
| H | -2.09663900 | -2.09611300 | 2.12904200  |
| C | -3.17494100 | -1.64528500 | -3.01833600 |
| H | -4.19642800 | -1.25301800 | -2.91870400 |
| H | -2.49609100 | -0.78106100 | -2.96065200 |
| H | -3.07996100 | -2.07869000 | -4.01988000 |
| C | -3.00013200 | 2.74537900  | -2.00914000 |
| H | -3.95164800 | 2.20777400  | -2.11772800 |
| H | -3.00739800 | 3.59034800  | -2.70644400 |
| H | -2.20542300 | 2.05439300  | -2.33076500 |
| C | -2.93419300 | 1.78706100  | 2.94533000  |
| H | -3.95568800 | 1.38400900  | 2.96559300  |
| H | -2.25409400 | 0.92578300  | 2.86733100  |
| H | -2.74754100 | 2.27397200  | 3.90851700  |
| C | 1.82566000  | 4.22201100  | 0.13154100  |
| H | 1.17142200  | 4.98773000  | 0.57039000  |
| H | 2.76324600  | 4.23985800  | 0.71479200  |
| C | 3.13134200  | 3.51907500  | -1.88020700 |
| H | 4.14708500  | 3.75643800  | -1.51405500 |
| C | 2.13531900  | 4.53135400  | -1.32541500 |
| H | 1.19812500  | 4.47784600  | -1.90419300 |
| H | 2.52339000  | 5.55125600  | -1.44352200 |
| H | 3.19523600  | 3.59895300  | -2.97542600 |

### INT3b

Zero-point correction= 0.699852 (Hartree/Particle)  
 Thermal correction to Energy= 0.745897

Thermal correction to Enthalpy= 0.746841  
 Thermal correction to Gibbs Free Energy= 0.617831  
 Sum of electronic and zero-point Energies= -2296.940108  
 Sum of electronic and thermal Energies= -2296.894064  
 Sum of electronic and thermal Enthalpies= -2296.893120  
 Sum of electronic and thermal Free Energies= -2297.022129  
 M06/6-311++G(d,p)-SDD/SMD//M06/6-31G(d)-LANL2DZ energy in DCE solvent = -2298.53879502

Cartesian coordinates:

|    |             |             |             |
|----|-------------|-------------|-------------|
| C  | -4.06401100 | -1.56829100 | 1.70731800  |
| C  | -5.29965200 | -1.10323400 | 1.07426800  |
| C  | -2.87145800 | -0.91161700 | 1.65944600  |
| O  | -5.34166200 | -0.18745600 | 0.25489000  |
| H  | -4.13287400 | -2.43696900 | 2.36223400  |
| C  | -1.68178400 | -1.38474700 | 2.43655700  |
| H  | -1.23659300 | -0.54785000 | 2.99098100  |
| H  | -1.94120300 | -2.18635600 | 3.13537100  |
| H  | -0.90526200 | -1.75991600 | 1.74695400  |
| C  | -6.55501200 | -1.82044000 | 1.49637400  |
| H  | -7.40909500 | -1.45434400 | 0.92044800  |
| H  | -6.45121100 | -2.90586400 | 1.35942400  |
| H  | -6.74449900 | -1.65877000 | 2.56643300  |
| C  | -1.28024000 | -0.47407700 | -0.74208900 |
| C  | -2.10431700 | 0.55438300  | -0.09256700 |
| Au | 0.71669200  | -0.20679500 | -0.34027600 |
| N  | -2.71988800 | 0.27257300  | 0.99413700  |
| C  | 4.56182600  | 1.23279600  | 0.76424000  |
| C  | 4.76784700  | -0.08819700 | 1.00043400  |
| H  | 5.20272700  | 2.09486900  | 0.89496500  |
| H  | 5.62646500  | -0.62639500 | 1.38047100  |
| N  | 3.27088900  | 1.35246100  | 0.28052900  |
| N  | 3.59629600  | -0.73968700 | 0.65046200  |
| C  | 2.67699400  | 0.14339600  | 0.20968300  |
| C  | -1.86741300 | -1.59842300 | -1.34203200 |
| N  | -2.08959800 | 1.83582300  | -0.59699800 |
| C  | -1.39229100 | 2.15089800  | -1.84546900 |
| H  | -0.32546600 | 2.36468500  | -1.68431300 |
| H  | -1.49774100 | 1.30137000  | -2.52949100 |
| H  | -1.86032200 | 3.02678900  | -2.30039700 |
| S  | -2.45383800 | 3.17010800  | 0.45492200  |
| O  | -1.74355200 | 2.97539700  | 1.70658300  |
| O  | -2.20142800 | 4.34359500  | -0.36268500 |
| C  | -3.23605700 | -1.60526600 | -1.53997100 |
| C  | 3.33273600  | -2.14891200 | 0.75768000  |
| C  | 3.57916700  | -2.95792100 | -0.35541300 |
| C  | 2.78850900  | -2.62808200 | 1.95405300  |
| C  | 3.27360500  | -4.31422200 | -0.23948000 |
| C  | 2.49424400  | -3.98948300 | 2.02195500  |
| C  | 2.73680900  | -4.82465800 | 0.93677600  |
| H  | 3.46446300  | -4.97353600 | -1.08554400 |
| H  | 2.07638800  | -4.39537400 | 2.94261100  |
| H  | 2.50979600  | -5.88654800 | 1.01096700  |
| C  | 2.59611500  | 2.56559900  | -0.10200300 |
| C  | 2.81180100  | 3.05603400  | -1.39563100 |
| C  | 1.70112600  | 3.14508600  | 0.80388800  |
| C  | 2.08846500  | 4.18419700  | -1.78010800 |
| C  | 0.99610200  | 4.26982200  | 0.37106900  |
| C  | 1.18391700  | 4.78062400  | -0.90695400 |
| H  | 2.23418200  | 4.59027600  | -2.78060200 |
| H  | 0.27582000  | 4.73116600  | 1.04492800  |

|   |             |             |             |
|---|-------------|-------------|-------------|
| H | 0.60904500  | 5.64792800  | -1.22595900 |
| C | -4.20375600 | 2.99939800  | 0.69851500  |
| H | -4.42394800 | 1.99070100  | 1.05947800  |
| H | -4.48974300 | 3.75949800  | 1.43301300  |
| H | -4.69498600 | 3.18753700  | -0.26018800 |
| C | 1.45624200  | 2.57013200  | 2.16658300  |
| H | 2.34877700  | 2.09042900  | 2.58933900  |
| H | 1.12060900  | 3.34940300  | 2.85936700  |
| H | 0.65026000  | 1.81958800  | 2.13295400  |
| C | 3.76294100  | 2.37876000  | -2.33626600 |
| H | 4.80429900  | 2.44613200  | -1.99175600 |
| H | 3.53301300  | 1.30829400  | -2.44579100 |
| H | 3.71777000  | 2.83497500  | -3.33095600 |
| C | 2.51888300  | -1.70951000 | 3.10762500  |
| H | 3.42991300  | -1.20114600 | 3.45226200  |
| H | 1.80105800  | -0.92044500 | 2.83684100  |
| H | 2.10546000  | -2.26156800 | 3.95866300  |
| C | 4.12062800  | -2.38600800 | -1.63070600 |
| H | 3.37336000  | -1.75250100 | -2.13236400 |
| H | 5.00641700  | -1.75895300 | -1.46256100 |
| H | 4.40134600  | -3.18233700 | -2.32836900 |
| C | -3.96093600 | -2.69782100 | -2.21475800 |
| C | -3.05404400 | -3.72323900 | -2.88367000 |
| C | -1.85856100 | -4.03082000 | -1.99163500 |
| C | -1.02154100 | -2.77667200 | -1.76681500 |
| H | -4.69820300 | -2.26172800 | -2.90741300 |
| H | -3.62345600 | -4.63137600 | -3.11394500 |
| H | -2.21617900 | -4.41197400 | -1.02096700 |
| H | -0.24709400 | -2.95242400 | -1.00306400 |
| H | -4.58982500 | -3.16815700 | -1.43279700 |
| H | -2.69960600 | -3.32367300 | -3.84636300 |
| H | -1.23792300 | -4.82182200 | -2.42933200 |
| H | -0.47621600 | -2.51543000 | -2.68917400 |
| H | -3.83900400 | -0.77045400 | -1.16594100 |

#### INT4b

Zero-point correction= 0.699734 (Hartree/Particle)

Thermal correction to Energy= 0.745870

Thermal correction to Enthalpy= 0.746814

Thermal correction to Gibbs Free Energy= 0.615720

Sum of electronic and zero-point Energies= -2296.936652

Sum of electronic and thermal Energies= -2296.890515

Sum of electronic and thermal Enthalpies= -2296.889571

Sum of electronic and thermal Free Energies= -2297.020666

M06/6-311++G(d,p)-SDD/SMD//M06/6-31G(d)-LANL2DZ energy in DCE solvent = -2298.52984529

Cartesian coordinates:

|   |            |             |             |
|---|------------|-------------|-------------|
| C | 5.21280300 | 0.21557100  | 1.59372000  |
| C | 5.66748200 | -0.15923700 | 0.25287500  |
| C | 4.01590500 | 0.76898200  | 1.91996700  |
| N | 3.06483300 | 1.14000700  | 0.98755600  |
| O | 5.01313600 | 0.01088100  | -0.77270700 |
| H | 5.92959300 | 0.08758600  | 2.40602100  |
| C | 7.03957800 | -0.77632300 | 0.19135100  |
| H | 7.26497000 | -1.09086000 | -0.83101300 |
| H | 7.79560400 | -0.05027500 | 0.52130600  |
| H | 7.11518700 | -1.63628200 | 0.87044500  |
| C | 3.68198800 | 1.17495900  | 3.31981600  |
| H | 3.52031100 | 2.25985800  | 3.36152300  |

|    |             |             |             |
|----|-------------|-------------|-------------|
| H  | 2.74595300  | 0.69754400  | 3.63890500  |
| H  | 4.48505000  | 0.90782000  | 4.01425100  |
| C  | 1.27427500  | 0.97784100  | -0.52943500 |
| C  | 2.31805300  | 0.36450000  | 0.30874700  |
| N  | 2.33633700  | -1.05549700 | 0.36289300  |
| S  | 1.64552600  | -1.82335900 | 1.70936500  |
| O  | 1.22901700  | -0.77518600 | 2.62924800  |
| O  | 0.69704400  | -2.80940600 | 1.21761300  |
| Au | -0.64061500 | 0.28991900  | -0.23253500 |
| C  | -2.58294300 | -0.40721500 | -0.03029800 |
| N  | -3.09762500 | -1.53969000 | -0.55387100 |
| C  | -4.76607500 | -0.56061100 | 0.48920500  |
| C  | -4.44257900 | -1.65527400 | -0.24294300 |
| H  | -5.69751700 | -0.24343700 | 0.93965500  |
| H  | -5.03132900 | -2.50161900 | -0.57156300 |
| N  | -3.60885500 | 0.19305500  | 0.60571200  |
| C  | 2.24309500  | -1.77125700 | -0.91639300 |
| H  | 2.96388400  | -1.31416800 | -1.60252000 |
| H  | 2.53942700  | -2.81458500 | -0.76614800 |
| H  | 1.22783600  | -1.76301500 | -1.34108700 |
| C  | 1.59085500  | 1.97401500  | -1.46507500 |
| C  | 2.90087100  | 2.08136200  | -1.89792400 |
| H  | 3.66900400  | 1.45772800  | -1.43133300 |
| C  | 0.50319000  | 2.82294500  | -2.08248600 |
| H  | -0.08463900 | 2.20164700  | -2.77996200 |
| H  | -0.19841100 | 3.13230800  | -1.29308700 |
| C  | -3.47932800 | 1.43687100  | 1.31449300  |
| C  | -3.78089100 | 2.61944500  | 0.63081100  |
| C  | -3.02147200 | 1.40312200  | 2.63498300  |
| C  | -3.63329500 | 3.81677500  | 1.32884100  |
| C  | -2.89210900 | 2.62647200  | 3.29377200  |
| C  | -3.19703800 | 3.81912000  | 2.64946300  |
| H  | -3.86680900 | 4.75528500  | 0.82721100  |
| H  | -2.54590500 | 2.63535700  | 4.32662500  |
| H  | -3.09350200 | 4.76260400  | 3.18212400  |
| C  | -2.30087900 | -2.49346000 | -1.27618200 |
| C  | -1.80219400 | -3.59376000 | -0.57285800 |
| C  | -2.01872900 | -2.24424600 | -2.62373700 |
| C  | -0.96988300 | -4.47054200 | -1.26851000 |
| C  | -1.18647300 | -3.15139200 | -3.27883600 |
| C  | -0.66358400 | -4.25110900 | -2.60596300 |
| H  | -0.55604000 | -5.33051500 | -0.74334400 |
| H  | -0.95473300 | -2.99224400 | -4.33157700 |
| H  | -0.01663900 | -4.94924200 | -3.13435400 |
| C  | 3.02788700  | -2.69537800 | 2.41294300  |
| H  | 2.65626300  | -3.24955100 | 3.28063200  |
| H  | 3.42293700  | -3.38974700 | 1.66475300  |
| H  | 3.79003600  | -1.96661100 | 2.70595800  |
| C  | -2.14696100 | -3.81635500 | 0.86757700  |
| H  | -3.19811900 | -4.11334400 | 0.99192100  |
| H  | -1.52248200 | -4.60599700 | 1.29748700  |
| H  | -1.98524500 | -2.90852600 | 1.46486800  |
| C  | -2.57280900 | -1.04473500 | -3.33317700 |
| H  | -3.63900800 | -0.89198100 | -3.11786600 |
| H  | -2.05357200 | -0.12147400 | -3.03071800 |
| H  | -2.45935500 | -1.14732700 | -4.41810000 |
| C  | -4.22305100 | 2.59505400  | -0.80161200 |
| H  | -5.15262000 | 2.02560800  | -0.93908400 |
| H  | -4.39871100 | 3.61027000  | -1.17351500 |

|   |             |             |             |
|---|-------------|-------------|-------------|
| H | -3.46617200 | 2.12480500  | -1.44846600 |
| C | -2.65002400 | 0.11454000  | 3.30537300  |
| H | -3.37932600 | -0.68303100 | 3.10943500  |
| H | -1.67062300 | -0.24958000 | 2.95695100  |
| H | -2.58031100 | 0.24752300  | 4.39056700  |
| C | 3.32423300  | 2.97241000  | -2.99393100 |
| H | 3.94752100  | 3.75150200  | -2.51119100 |
| H | 4.03604200  | 2.43732600  | -3.64133700 |
| C | 1.06932100  | 4.03305000  | -2.81560700 |
| C | 2.17498800  | 3.60448800  | -3.76994800 |
| H | 1.47335400  | 4.75203400  | -2.08470700 |
| H | 0.26704900  | 4.55234900  | -3.35371300 |
| H | 2.54465300  | 4.45184500  | -4.35941800 |
| H | 1.77491800  | 2.87334000  | -4.48950300 |

### INT5b

Zero-point correction= 0.703192 (Hartree/Particle)  
 Thermal correction to Energy= 0.748161  
 Thermal correction to Enthalpy= 0.749105  
 Thermal correction to Gibbs Free Energy= 0.622305  
 Sum of electronic and zero-point Energies= -2296.970130  
 Sum of electronic and thermal Energies= -2296.925162  
 Sum of electronic and thermal Enthalpies= -2296.924218  
 Sum of electronic and thermal Free Energies= -2297.051018  
 M06/6-311++G(d,p)-SDD/SMD//M06/6-31G(d)-LANL2DZ energy in DCE solvent = -2298.56841891

Cartesian coordinates:

|    |             |             |             |
|----|-------------|-------------|-------------|
| C  | -4.02086000 | -1.73534300 | 0.49037400  |
| C  | -5.47742600 | -1.24393900 | 0.28308100  |
| C  | -3.46007300 | -0.82621600 | 1.55516300  |
| O  | -5.65305200 | -0.11742100 | -0.12718600 |
| H  | -4.04019600 | -2.75250800 | 0.91595000  |
| C  | -3.98140800 | -1.03459200 | 2.93828100  |
| H  | -3.42773000 | -0.41958900 | 3.65338900  |
| H  | -5.04450200 | -0.75120100 | 2.99033000  |
| H  | -3.91899400 | -2.09042600 | 3.23261200  |
| C  | -6.58663500 | -2.19394500 | 0.60429400  |
| H  | -7.55717900 | -1.71809200 | 0.44045200  |
| H  | -6.50296200 | -3.09185200 | -0.02411900 |
| H  | -6.50835200 | -2.53965100 | 1.64476300  |
| C  | -1.21534900 | -0.68369900 | -0.37656800 |
| C  | -2.02472000 | 0.36746500  | 0.17885100  |
| Au | 0.82041500  | -0.27261100 | -0.16257500 |
| N  | -2.66962100 | 0.16318400  | 1.35928100  |
| C  | 4.62531500  | 1.58521000  | 0.24062700  |
| C  | 5.00645100  | 0.31502600  | 0.52091300  |
| H  | 5.18162300  | 2.51270400  | 0.20451400  |
| H  | 5.96767800  | -0.10830600 | 0.78171500  |
| N  | 3.26547600  | 1.54041500  | -0.02273900 |
| N  | 3.86885700  | -0.47169700 | 0.41997400  |
| C  | 2.79647000  | 0.27701600  | 0.08714200  |
| C  | -1.83082900 | -1.78714700 | -0.84968300 |
| N  | -2.08287700 | 1.59310100  | -0.35261700 |
| C  | -1.43962000 | 1.88597200  | -1.63791200 |
| H  | -0.36921700 | 2.09392300  | -1.49828600 |
| H  | -1.56486000 | 1.01973400  | -2.29253600 |
| H  | -1.92281800 | 2.76155100  | -2.07576300 |
| S  | -2.58794000 | 3.00535200  | 0.61344800  |
| O  | -1.75413100 | 3.02749700  | 1.79634500  |

|   |             |             |             |
|---|-------------|-------------|-------------|
| O | -2.56510700 | 4.08725500  | -0.34978100 |
| C | -3.35481700 | -1.77942100 | -0.91645300 |
| C | 3.80523800  | -1.88559600 | 0.66698400  |
| C | 3.88604700  | -2.75849800 | -0.42176800 |
| C | 3.63383300  | -2.31385200 | 1.98710300  |
| C | 3.80648800  | -4.12473200 | -0.15178000 |
| C | 3.55999600  | -3.68824300 | 2.20924300  |
| C | 3.64801000  | -4.58488000 | 1.15034300  |
| H | 3.87577100  | -4.83188200 | -0.97773600 |
| H | 3.43156700  | -4.05393000 | 3.22739100  |
| H | 3.59440000  | -5.65487600 | 1.34244200  |
| C | 2.43412500  | 2.65744500  | -0.38109700 |
| C | 2.41560500  | 3.05811900  | -1.72253900 |
| C | 1.64733400  | 3.25404700  | 0.61022900  |
| C | 1.56989300  | 4.11274800  | -2.06595000 |
| C | 0.81172000  | 4.30175400  | 0.21777700  |
| C | 0.77266100  | 4.72646500  | -1.10488200 |
| H | 1.53570100  | 4.44746300  | -3.10232100 |
| H | 0.17611500  | 4.77663600  | 0.96399800  |
| H | 0.10292500  | 5.53652400  | -1.38809000 |
| C | -4.28373600 | 2.65082600  | 1.03328800  |
| H | -4.30251200 | 2.07263200  | 1.95993600  |
| H | -4.75586100 | 3.62975100  | 1.16935700  |
| H | -4.76331100 | 2.10036800  | 0.21692700  |
| C | 1.66048600  | 2.76996800  | 2.02880600  |
| H | 2.67012200  | 2.50400600  | 2.36949000  |
| H | 1.25780700  | 3.53353900  | 2.70279800  |
| H | 1.02968500  | 1.87448500  | 2.14513900  |
| C | 3.25044100  | 2.35743500  | -2.75195300 |
| H | 4.32629400  | 2.49654100  | -2.57727700 |
| H | 3.06614200  | 1.27256100  | -2.74906200 |
| H | 3.02960600  | 2.73460200  | -3.75628400 |
| C | 3.51713100  | -1.32906300 | 3.11120800  |
| H | 4.43686400  | -0.74219800 | 3.24289000  |
| H | 2.70401900  | -0.60949500 | 2.93301500  |
| H | 3.31358600  | -1.83987100 | 4.05843100  |
| C | 4.02771600  | -2.24680600 | -1.82365700 |
| H | 3.09382100  | -1.78118300 | -2.17455800 |
| H | 4.81398200  | -1.48450900 | -1.91011700 |
| H | 4.27173700  | -3.06142100 | -2.51425800 |
| C | -4.00047400 | -2.92680000 | -1.71874000 |
| C | -3.04824400 | -3.57425500 | -2.71110600 |
| C | -1.83731000 | -4.09662100 | -1.95274600 |
| C | -1.01986500 | -2.93063600 | -1.41335000 |
| H | -4.90772100 | -2.55540800 | -2.21775600 |
| H | -3.56519200 | -4.38357400 | -3.24219700 |
| H | -2.18392100 | -4.74258400 | -1.12907900 |
| H | -0.28800700 | -3.26075600 | -0.65832300 |
| H | -4.33115400 | -3.72049900 | -1.02657500 |
| H | -2.72910100 | -2.84709900 | -3.47621900 |
| H | -1.20351500 | -4.72454400 | -2.59134200 |
| H | -0.41341900 | -2.52044000 | -2.23774600 |
| H | -3.64077700 | -0.83546500 | -1.41109100 |

#### INT6b

|                                          |                             |
|------------------------------------------|-----------------------------|
| Zero-point correction=                   | 0.705024 (Hartree/Particle) |
| Thermal correction to Energy=            | 0.748908                    |
| Thermal correction to Enthalpy=          | 0.749852                    |
| Thermal correction to Gibbs Free Energy= | 0.628715                    |



Sum of electronic and zero-point Energies= -2296.986929  
 Sum of electronic and thermal Energies= -2296.943045  
 Sum of electronic and thermal Enthalpies= -2296.942100  
 Sum of electronic and thermal Free Energies= -2297.063237  
 M06/6-311++G(d,p)-SDD/SMD//M06/6-31G(d)-LANL2DZ energy in DCE solvent = -2298.59164396

Cartesian coordinates:

|    |             |             |             |
|----|-------------|-------------|-------------|
| C  | 1.66798800  | -0.87540000 | 0.51948700  |
| C  | 1.26002900  | -1.79658900 | -0.49876700 |
| N  | 1.37335800  | -1.69060800 | -1.84580200 |
| S  | 0.22573700  | -2.60445300 | -2.85831100 |
| O  | -1.09772100 | -2.46968500 | -2.27896200 |
| O  | 0.49518400  | -2.12756400 | -4.20067200 |
| Au | -0.23762600 | 0.25685400  | 0.26081200  |
| C  | -1.94267300 | 1.37860100  | 0.14612900  |
| N  | -3.20517300 | 0.96697500  | 0.37658500  |
| C  | -3.35034200 | 3.10299100  | -0.13511200 |
| C  | -4.09192000 | 2.01786200  | 0.20587900  |
| H  | -3.63163000 | 4.12323700  | -0.36146800 |
| H  | -5.15836500 | 1.89090300  | 0.33912900  |
| N  | -2.02779200 | 2.68758500  | -0.16475500 |
| N  | 0.62797800  | -2.93731600 | 0.00502500  |
| C  | 0.68638400  | -2.87321100 | 1.29348300  |
| C  | 2.84105400  | -2.20271400 | 2.30131000  |
| C  | 1.45809500  | -1.69941400 | 1.80512200  |
| C  | 0.07782300  | -3.88753900 | 2.17781000  |
| H  | 0.82877300  | -4.30405100 | 2.86367800  |
| H  | -0.70372300 | -3.42086500 | 2.79440600  |
| H  | -0.36915200 | -4.69647100 | 1.59340300  |
| O  | 3.41264500  | -3.07710900 | 1.69519300  |
| C  | 3.39474800  | -1.51982500 | 3.51172000  |
| H  | 4.39360400  | -1.90335600 | 3.73627700  |
| H  | 3.44111200  | -0.43471700 | 3.34038900  |
| H  | 2.73289700  | -1.67770700 | 4.37470300  |
| C  | 1.90498600  | -0.47260600 | -2.45857800 |
| H  | 1.41941200  | 0.41561500  | -2.02070500 |
| H  | 2.98315500  | -0.40469700 | -2.29165200 |
| H  | 1.70161600  | -0.50741900 | -3.53003100 |
| H  | 0.94108300  | -1.16552000 | 2.61732500  |
| C  | -0.85994700 | 3.46642300  | -0.48512300 |
| C  | -0.19115600 | 4.11904100  | 0.55550000  |
| C  | -0.39851500 | 3.45042900  | -1.80605700 |
| C  | 0.99432800  | 4.78281600  | 0.23813100  |
| C  | 0.79486700  | 4.12255500  | -2.07442500 |
| C  | 1.48618000  | 4.77928400  | -1.06232900 |
| H  | 1.53300100  | 5.30670600  | 1.02721100  |
| H  | 1.17619400  | 4.13373800  | -3.09486000 |
| H  | 2.41223600  | 5.30362800  | -1.29181200 |
| C  | -3.48852200 | -0.40372200 | 0.71708500  |
| C  | -3.66424500 | -1.31429900 | -0.32932600 |
| C  | -3.43373400 | -0.77489200 | 2.06487800  |
| C  | -3.76380400 | -2.66374700 | 0.01058200  |
| C  | -3.55652800 | -2.13269400 | 2.35685900  |
| C  | -3.70540900 | -3.06879900 | 1.33777100  |
| H  | -3.88579600 | -3.39763200 | -0.78471100 |
| H  | -3.53687700 | -2.45340200 | 3.39854800  |
| H  | -3.79076700 | -4.12588700 | 1.58453300  |
| C  | 0.82204600  | -4.26985800 | -2.72294100 |
| H  | 1.85749000  | -4.28598100 | -3.07388700 |
| H  | 0.73362600  | -4.59541700 | -1.68480200 |

|   |             |             |             |
|---|-------------|-------------|-------------|
| H | 0.18789400  | -4.86785700 | -3.38612000 |
| C | -3.22456400 | 0.23999700  | 3.14818600  |
| H | -3.96204000 | 1.05250100  | 3.10242400  |
| H | -3.30450000 | -0.22370300 | 4.13753200  |
| H | -2.23133400 | 0.70898700  | 3.07689800  |
| C | -3.71704300 | -0.86752300 | -1.75738100 |
| H | -4.36786400 | 0.00585500  | -1.89493500 |
| H | -2.71599700 | -0.60708400 | -2.12623100 |
| H | -4.08615200 | -1.67357900 | -2.40026700 |
| C | -0.70949500 | 4.08399100  | 1.96109400  |
| H | -1.73752200 | 4.46390500  | 2.03338200  |
| H | -0.72092300 | 3.05915700  | 2.36164300  |
| H | -0.08365000 | 4.69302500  | 2.62220500  |
| C | -1.13971400 | 2.72083900  | -2.88537800 |
| H | -1.09407200 | 1.63048600  | -2.74204200 |
| H | -2.20377500 | 2.99122100  | -2.91237400 |
| H | -0.71337100 | 2.94185400  | -3.86974100 |
| C | 2.84313500  | 0.04887500  | 0.45107700  |
| C | 4.02726100  | -0.38215400 | -0.01230400 |
| C | 2.66182300  | 1.45853800  | 0.96181000  |
| C | 5.23938800  | 0.48646100  | -0.14943800 |
| C | 3.98548000  | 2.17773300  | 1.18619500  |
| H | 2.05132100  | 2.03225800  | 0.23697900  |
| C | 4.89856300  | 1.96510800  | -0.01233900 |
| H | 5.98423200  | 0.19335100  | 0.61010800  |
| H | 4.47764300  | 1.78404000  | 2.09139700  |
| H | 5.81439700  | 2.56342600  | 0.07142700  |
| H | 5.72474400  | 0.28597200  | -1.11667700 |
| H | 4.37536700  | 2.30781900  | -0.92233900 |
| H | 3.80554500  | 3.24620500  | 1.36616800  |
| H | 2.05945700  | 1.44710400  | 1.88910000  |
| H | 4.12454300  | -1.42679700 | -0.32086600 |

### TS1b

Zero-point correction= 0.699321 (Hartree/Particle)

Thermal correction to Energy= 0.745061

Thermal correction to Enthalpy= 0.746005

Thermal correction to Gibbs Free Energy= 0.616052

Sum of electronic and zero-point Energies= -2296.900019

Sum of electronic and thermal Energies= -2296.854280

Sum of electronic and thermal Enthalpies= -2296.853335

Sum of electronic and thermal Free Energies= -2296.983289

M06/6-311++G(d,p)-SDD/SMD//M06/6-31G(d)-LANL2DZ energy in DCE solvent = -2298.49198979

Cartesian coordinates:

|    |             |             |             |
|----|-------------|-------------|-------------|
| C  | 1.40643000  | 0.41153700  | -0.36940800 |
| C  | 1.97221700  | -0.72684900 | -0.10248100 |
| N  | 1.82819600  | -2.04128400 | 0.01277800  |
| S  | 1.71575600  | -2.69108500 | 1.61445900  |
| O  | 1.67470500  | -1.55405100 | 2.51354900  |
| O  | 0.66437900  | -3.69185000 | 1.58207800  |
| Au | -0.68965900 | 0.15005100  | -0.23015500 |
| C  | -2.72878300 | 0.03691400  | -0.03593300 |
| N  | -3.53321000 | -1.03509800 | -0.18747100 |
| C  | -4.86222400 | 0.62410900  | 0.37686900  |
| C  | -4.85369900 | -0.69485000 | 0.06252700  |
| H  | -5.66777900 | 1.29694300  | 0.64051100  |
| H  | -5.65024200 | -1.42419100 | -0.00561100 |
| N  | -3.54610000 | 1.05479800  | 0.30927400  |
| N  | 3.94509900  | -0.47091200 | 0.19939600  |

|   |             |             |             |
|---|-------------|-------------|-------------|
| C | 5.90775500  | 0.59530400  | 0.26143200  |
| C | 5.92713800  | -0.30230500 | -0.76339900 |
| C | 1.34441700  | -2.86306300 | -1.10625200 |
| H | 1.82297300  | -2.50035300 | -2.02005700 |
| H | 1.61796000  | -3.91094700 | -0.94567900 |
| H | 0.25092500  | -2.78938100 | -1.19410300 |
| C | 4.62200400  | 0.46152400  | 0.83859300  |
| C | 4.01348000  | 1.20139000  | 1.97102500  |
| H | 3.10652800  | 0.69752700  | 2.32418800  |
| H | 4.72080400  | 1.29168300  | 2.80280100  |
| H | 3.74726400  | 2.21712700  | 1.64607400  |
| O | 4.74707500  | -0.94866100 | -0.81794800 |
| C | 6.94363000  | -0.69049600 | -1.76308900 |
| H | 7.84671900  | -0.08624700 | -1.63949600 |
| H | 7.21497400  | -1.74788200 | -1.65580600 |
| H | 6.56432600  | -0.54920600 | -2.78241200 |
| H | 6.70391500  | 1.25951100  | 0.57200200  |
| C | -3.06972100 | 2.38709500  | 0.56431000  |
| C | -2.92071300 | 3.25795000  | -0.51940000 |
| C | -2.72774100 | 2.72648400  | 1.87758500  |
| C | -2.41391100 | 4.53055000  | -0.25250400 |
| C | -2.22584000 | 4.00900000  | 2.09680600  |
| C | -2.07085700 | 4.90233800  | 1.04247600  |
| H | -2.29360400 | 5.23501000  | -1.07507900 |
| H | -1.95550900 | 4.30495000  | 3.10977800  |
| H | -1.68402300 | 5.90192500  | 1.23342500  |
| C | -3.04864300 | -2.33386900 | -0.56856300 |
| C | -2.51322000 | -3.16259900 | 0.42179000  |
| C | -3.09643900 | -2.67964300 | -1.92397700 |
| C | -2.01614000 | -4.40230000 | 0.01422000  |
| C | -2.59308700 | -3.92891900 | -2.28280500 |
| C | -2.06004200 | -4.78239000 | -1.32147100 |
| H | -1.58356000 | -5.06466700 | 0.76217800  |
| H | -2.62225700 | -4.23097200 | -3.32923600 |
| H | -1.67576100 | -5.75675600 | -1.61859100 |
| C | 3.28707700  | -3.50901300 | 1.77256200  |
| H | 3.32136200  | -3.96177700 | 2.76865000  |
| H | 3.36389700  | -4.28437700 | 1.00431700  |
| H | 4.07494200  | -2.75887200 | 1.65751800  |
| C | -2.44524300 | -2.73303600 | 1.85604200  |
| H | -3.36046700 | -2.21901000 | 2.17949300  |
| H | -2.28322300 | -3.59457300 | 2.51228600  |
| H | -1.60415500 | -2.04268900 | 2.02426600  |
| C | -3.65180300 | -1.73433700 | -2.94636800 |
| H | -4.72641600 | -1.55489800 | -2.80245200 |
| H | -3.15649700 | -0.75314900 | -2.89961500 |
| H | -3.51772000 | -2.13115200 | -3.95842500 |
| C | -3.25056900 | 2.83060100  | -1.91773400 |
| H | -4.20842400 | 2.29681000  | -1.97706000 |
| H | -3.30391600 | 3.69492500  | -2.58867300 |
| H | -2.48110500 | 2.15041600  | -2.31449500 |
| C | -2.87165400 | 1.73850500  | 2.99531800  |
| H | -3.90385800 | 1.37591300  | 3.09584300  |
| H | -2.23833200 | 0.85367600  | 2.83202400  |
| H | -2.58135000 | 2.18537600  | 3.95211300  |
| C | 1.92566400  | 1.74875600  | -0.62833200 |
| C | 2.95256600  | 1.95860100  | -1.47076700 |
| C | 1.19654600  | 2.88625700  | 0.04897200  |
| C | 3.47396900  | 3.31759100  | -1.81990900 |

|   |            |            |             |
|---|------------|------------|-------------|
| C | 1.96544200 | 4.19832500 | -0.02964600 |
| H | 0.19980400 | 3.00571200 | -0.41676000 |
| C | 2.49768700 | 4.42412800 | -1.43741400 |
| H | 4.43932200 | 3.47179000 | -1.30184300 |
| H | 2.81287600 | 4.17929200 | 0.67771800  |
| H | 2.98163600 | 5.40538500 | -1.52430800 |
| H | 0.99018500 | 2.61647100 | 1.09817400  |
| H | 1.31622400 | 5.02558100 | 0.28763700  |
| H | 1.65346500 | 4.42283400 | -2.14562000 |
| H | 3.71239800 | 3.36249700 | -2.89255200 |
| H | 3.42529700 | 1.09728000 | -1.94793800 |

### TS2b

Zero-point correction= 0.702144 (Hartree/Particle)  
 Thermal correction to Energy= 0.744789  
 Thermal correction to Enthalpy= 0.745733  
 Thermal correction to Gibbs Free Energy= 0.627064  
 Sum of electronic and zero-point Energies= -2296.876153  
 Sum of electronic and thermal Energies= -2296.833508  
 Sum of electronic and thermal Enthalpies= -2296.832563  
 Sum of electronic and thermal Free Energies= -2296.951232  
 M06/6-311++G(d,p)-SDD/SMD//M06/6-31G(d)-LANL2DZ energy in DCE solvent = -2298.47196195

Cartesian coordinates:

|    |             |             |             |
|----|-------------|-------------|-------------|
| C  | 1.35116200  | 0.60379600  | -0.40855900 |
| C  | 2.01359600  | -0.48281700 | -0.14738100 |
| Au | -0.70480400 | 0.14313000  | -0.25065900 |
| C  | 5.76638900  | 0.76397200  | 0.43600000  |
| C  | 5.79834200  | -0.09578600 | -0.70244600 |
| C  | 4.49091600  | 0.71888300  | 0.88883300  |
| N  | 4.63022000  | -0.64295600 | -0.93760000 |
| O  | 3.79556800  | -0.13001400 | 0.07398700  |
| H  | 6.58986400  | 1.32469000  | 0.86007300  |
| C  | 6.95406800  | -0.40967100 | -1.58111500 |
| H  | 7.36662000  | 0.50722100  | -2.01845000 |
| H  | 7.75748500  | -0.89042600 | -1.01015800 |
| H  | 6.64938100  | -1.07942200 | -2.39082100 |
| C  | 3.76173600  | 1.33384700  | 2.01508800  |
| H  | 3.09931600  | 2.13150900  | 1.65138900  |
| H  | 3.13855600  | 0.59283500  | 2.53324500  |
| H  | 4.47165800  | 1.76966000  | 2.72422000  |
| C  | -4.88255700 | 0.15921800  | 0.48349200  |
| C  | -4.73525500 | -1.15439500 | 0.18131600  |
| H  | -5.74946200 | 0.73983900  | 0.77099500  |
| H  | -5.44570000 | -1.96994600 | 0.14859500  |
| C  | -2.71282400 | -0.18794900 | -0.00273400 |
| N  | -3.39412700 | -1.34623300 | -0.11519700 |
| N  | -3.62730200 | 0.73542900  | 0.36402500  |
| N  | 2.00528400  | -1.80154100 | -0.05679200 |
| S  | 2.02556000  | -2.51984200 | 1.51479400  |
| O  | 1.77167300  | -1.44332000 | 2.45424600  |
| O  | 1.18202700  | -3.69680100 | 1.43580700  |
| C  | 1.76173500  | -2.67361500 | -1.21712100 |
| H  | 2.07261100  | -2.12379800 | -2.10870300 |
| H  | 2.35813900  | -3.58870800 | -1.13579400 |
| H  | 0.69741200  | -2.93920100 | -1.27453200 |
| C  | 1.75408300  | 1.98134000  | -0.67142000 |
| C  | 2.81190000  | 2.27463300  | -1.44981700 |
| H  | 3.40643400  | 1.45732900  | -1.86411100 |
| C  | 3.72229100  | -3.03631900 | 1.66613400  |

|   |             |             |             |
|---|-------------|-------------|-------------|
| H | 4.36182400  | -2.14815200 | 1.67039100  |
| H | 3.81076200  | -3.58025000 | 2.61214100  |
| H | 3.97427900  | -3.69399500 | 0.82851900  |
| C | -2.78011800 | -2.58722200 | -0.50304100 |
| C | -2.86141800 | -2.96570300 | -1.84835200 |
| C | -2.09533400 | -3.32654000 | 0.46606400  |
| C | -2.23833000 | -4.15660600 | -2.21667000 |
| C | -1.48628700 | -4.51233900 | 0.04981100  |
| C | -1.56041300 | -4.92471300 | -1.27480800 |
| H | -2.28885700 | -4.48053400 | -3.25559400 |
| H | -0.93815600 | -5.10214400 | 0.78231900  |
| H | -1.08492500 | -5.85574400 | -1.57838100 |
| C | -3.29014800 | 2.11261400  | 0.60399400  |
| C | -2.89848700 | 2.48128600  | 1.89517100  |
| C | -3.31455200 | 3.00079000  | -0.47603900 |
| C | -2.52932600 | 3.81138800  | 2.09579900  |
| C | -2.93657800 | 4.32079600  | -0.22769200 |
| C | -2.54897600 | 4.72241600  | 1.04558600  |
| H | -2.22656700 | 4.13044600  | 3.09242800  |
| H | -2.95274700 | 5.03770000  | -1.04788500 |
| H | -2.26436600 | 5.75813500  | 1.22296300  |
| C | -3.70206300 | 2.54600600  | -1.85002500 |
| H | -2.96846000 | 1.83365800  | -2.25786700 |
| H | -4.67723000 | 2.04014900  | -1.86016800 |
| H | -3.75950500 | 3.39483600  | -2.54002900 |
| C | -3.57565700 | -2.11283800 | -2.85268500 |
| H | -4.65699700 | -2.06679800 | -2.66207200 |
| H | -3.20610100 | -1.07668900 | -2.83723100 |
| H | -3.43752900 | -2.50593800 | -3.86568700 |
| C | -1.98517800 | -2.86253100 | 1.88684300  |
| H | -2.92714600 | -2.43979100 | 2.26188800  |
| H | -1.69479900 | -3.69128000 | 2.54150000  |
| H | -1.21115900 | -2.08503900 | 1.99410300  |
| C | -2.85501100 | 1.48258500  | 3.01162200  |
| H | -3.82406900 | 0.98702500  | 3.16147300  |
| H | -2.11814100 | 0.68894900  | 2.81534500  |
| H | -2.58005600 | 1.96595500  | 3.95533400  |
| C | 0.86318800  | 3.05664600  | -0.09294200 |
| H | -0.09441900 | 3.06101200  | -0.64637600 |
| H | 0.59003000  | 2.79726400  | 0.94423300  |
| C | 1.50177000  | 4.43733600  | -0.15585100 |
| H | 0.75015900  | 5.19982100  | 0.09011100  |
| H | 2.29435900  | 4.52036700  | 0.60761900  |
| C | 2.10448500  | 4.68119400  | -1.53181300 |
| H | 2.49556000  | 5.70300200  | -1.61752300 |
| H | 1.31559800  | 4.57892400  | -2.29436100 |
| C | 3.20884800  | 3.66956000  | -1.81634200 |
| H | 3.50746800  | 3.70505700  | -2.87429400 |
| H | 4.12076800  | 3.93527600  | -1.25022200 |

### TS3b

|                                              |                             |
|----------------------------------------------|-----------------------------|
| Zero-point correction=                       | 0.700295 (Hartree/Particle) |
| Thermal correction to Energy=                | 0.745385                    |
| Thermal correction to Enthalpy=              | 0.746329                    |
| Thermal correction to Gibbs Free Energy=     | 0.619480                    |
| Sum of electronic and zero-point Energies=   | -2296.885135                |
| Sum of electronic and thermal Energies=      | -2296.840045                |
| Sum of electronic and thermal Enthalpies=    | -2296.839101                |
| Sum of electronic and thermal Free Energies= | -2296.965950                |

M06/6-311++G(d,p)-SDD/SMD//M06/6-31G(d)-LANL2DZ energy in DCE solvent = -2298.47677132

Cartesian coordinates:

|    |             |             |             |
|----|-------------|-------------|-------------|
| C  | 2.06260300  | 0.26891100  | -0.38793500 |
| C  | 1.28903300  | -0.76213900 | -0.41056500 |
| Au | -0.72323300 | -0.10003100 | -0.39604800 |
| C  | 6.23153100  | -0.19635800 | -0.24444600 |
| C  | 5.83109400  | -0.79207500 | -1.40309500 |
| C  | 5.03961400  | -0.01684800 | 0.49838600  |
| O  | 4.49751800  | -0.96766600 | -1.37957100 |
| N  | 4.01289800  | -0.49479600 | -0.17774700 |
| H  | 7.23905700  | 0.07062300  | 0.04753000  |
| N  | 1.55985200  | -2.11629800 | -0.19629700 |
| C  | 4.83414400  | 0.62682900  | 1.81986900  |
| H  | 4.78400200  | 1.71895400  | 1.70149700  |
| H  | 3.89841700  | 0.28029700  | 2.27315200  |
| H  | 5.66528000  | 0.40639100  | 2.49831700  |
| C  | 6.54303800  | -1.27187300 | -2.60610300 |
| H  | 6.13705400  | -0.80792800 | -3.51305900 |
| H  | 7.60821100  | -1.03352200 | -2.53718100 |
| H  | 6.43640300  | -2.35803100 | -2.71708600 |
| S  | 1.77567400  | -2.52439700 | 1.46386100  |
| O  | 2.09798200  | -1.30440800 | 2.18644600  |
| O  | 0.64891200  | -3.34972200 | 1.87710800  |
| C  | 0.71123100  | -3.07086700 | -0.92349700 |
| H  | 1.10965000  | -4.08308500 | -0.79448400 |
| H  | -0.33387500 | -3.05646600 | -0.58090500 |
| H  | 0.76099600  | -2.81269800 | -1.98536100 |
| C  | 2.21749600  | 1.68391400  | -0.23366600 |
| C  | 3.05779800  | 2.36225100  | -1.04235200 |
| H  | 3.62304300  | 1.80499800  | -1.79337600 |
| C  | 1.43711900  | 2.36284200  | 0.87389700  |
| H  | 0.38138200  | 2.45881300  | 0.55739400  |
| H  | 1.42744800  | 1.70572500  | 1.75739800  |
| C  | 3.22852300  | -3.54791600 | 1.38105800  |
| H  | 4.05493500  | -2.93731300 | 1.00573400  |
| H  | 3.42985100  | -3.90499300 | 2.39611100  |
| H  | 3.03580000  | -4.39701200 | 0.71876300  |
| C  | -2.72455000 | 0.26188100  | -0.09918400 |
| N  | -3.36774700 | 1.42429000  | 0.13871000  |
| C  | -4.90131000 | -0.14372600 | 0.30414100  |
| C  | -4.71352300 | 1.19580900  | 0.38865900  |
| H  | -5.78435800 | -0.75651300 | 0.42944100  |
| H  | -5.39608400 | 2.00814700  | 0.60204800  |
| N  | -3.66767400 | -0.69902300 | 0.00423800  |
| C  | -3.38545900 | -2.10300800 | -0.13873000 |
| C  | -2.83623200 | -2.78737000 | 0.95135600  |
| C  | -3.63710200 | -2.70224000 | -1.37841000 |
| C  | -2.54461500 | -4.14121000 | 0.77251700  |
| C  | -3.33507200 | -4.05678100 | -1.50735700 |
| C  | -2.79679900 | -4.76974900 | -0.44070200 |
| H  | -2.10824400 | -4.69774500 | 1.60073900  |
| H  | -3.52544500 | -4.55317800 | -2.45828000 |
| H  | -2.57004800 | -5.82788300 | -0.55835900 |
| C  | -2.71674600 | 2.70438300  | 0.19131900  |
| C  | -2.57704900 | 3.43263700  | -0.99406400 |
| C  | -2.23838200 | 3.14855300  | 1.42890500  |
| C  | -1.93499000 | 4.66882200  | -0.91351200 |
| C  | -1.61516400 | 4.39635100  | 1.46347200  |
| C  | -1.46531400 | 5.14924600  | 0.30404000  |

|   |             |             |             |
|---|-------------|-------------|-------------|
| H | -1.81689400 | 5.26313200  | -1.81895300 |
| H | -1.24787200 | 4.77733000  | 2.41639600  |
| H | -0.97921700 | 6.12277400  | 0.35060200  |
| C | -3.09017200 | 2.90021400  | -2.29759100 |
| H | -4.15352500 | 2.63034100  | -2.24015600 |
| H | -2.97584900 | 3.64203000  | -3.09518000 |
| H | -2.54795700 | 1.99350100  | -2.60315500 |
| C | -2.35548600 | 2.30136900  | 2.65953000  |
| H | -3.38596400 | 1.96736300  | 2.84158700  |
| H | -1.73807500 | 1.39369300  | 2.57623900  |
| H | -2.02054300 | 2.85057100  | 3.54605100  |
| C | -2.52756000 | -2.10280400 | 2.24847300  |
| H | -3.28712300 | -1.35766000 | 2.52092100  |
| H | -2.45119800 | -2.83176400 | 3.06243300  |
| H | -1.55672100 | -1.58492300 | 2.19752500  |
| C | -4.18985400 | -1.91062000 | -2.52517900 |
| H | -5.20536800 | -1.54254800 | -2.32332000 |
| H | -3.56901100 | -1.02870000 | -2.74211800 |
| H | -4.23580800 | -2.52052200 | -3.43371400 |
| C | 3.28669200  | 3.83180100  | -0.94654100 |
| H | 3.31451000  | 4.26159900  | -1.95878600 |
| H | 4.30143200  | 3.99914100  | -0.54109900 |
| C | 2.24537100  | 4.52926000  | -0.07875600 |
| H | 1.29764500  | 4.60622600  | -0.63690400 |
| H | 2.56714500  | 5.55452500  | 0.14428600  |
| C | 1.99924900  | 3.73955100  | 1.19973800  |
| H | 1.30436700  | 4.27502000  | 1.86084300  |
| H | 2.94566100  | 3.63499200  | 1.75623800  |

#### TS4b

Zero-point correction= 0.699250 (Hartree/Particle)

Thermal correction to Energy= 0.744260

Thermal correction to Enthalpy= 0.745204

Thermal correction to Gibbs Free Energy= 0.618534

Sum of electronic and zero-point Energies= -2296.860025

Sum of electronic and thermal Energies= -2296.815015

Sum of electronic and thermal Enthalpies= -2296.814071

Sum of electronic and thermal Free Energies= -2296.940741

M06/6-311++G(d,p)-SDD/SMD//M06/6-31G(d)-LANL2DZ energy in DCE solvent = -2298.45236939

Cartesian coordinates:

|   |            |             |             |
|---|------------|-------------|-------------|
| C | 2.20767100 | 0.85580600  | -0.43218200 |
| C | 1.54226700 | -0.22959100 | -0.08766000 |
| C | 5.48949000 | -0.62081000 | -1.01716000 |
| C | 5.72681000 | -0.10625200 | 0.29826000  |
| N | 2.25086700 | -1.45611800 | 0.19238100  |
| O | 3.82587600 | 0.62476500  | -0.50066300 |
| C | 1.94288300 | -2.49408100 | -0.80705500 |
| H | 0.87365000 | -2.75773100 | -0.82051700 |
| H | 2.24025500 | -2.10427400 | -1.78525400 |
| H | 2.53615500 | -3.39205800 | -0.60001600 |
| S | 1.92901900 | -1.96479900 | 1.79720500  |
| O | 2.03960600 | -0.76641300 | 2.61910400  |
| O | 0.73809300 | -2.80186200 | 1.87186700  |
| C | 4.65600300 | 0.65290500  | 0.60884100  |
| N | 4.35099700 | -0.22266300 | -1.51813500 |
| C | 4.22725100 | 1.47634400  | 1.75196600  |
| H | 3.33404500 | 1.04243400  | 2.22424900  |
| H | 5.03100400 | 1.51910200  | 2.49275400  |

|    |             |             |             |
|----|-------------|-------------|-------------|
| H  | 3.98958100  | 2.49793500  | 1.42607700  |
| H  | 6.60170000  | -0.27311700 | 0.91413300  |
| C  | 6.37260400  | -1.50493200 | -1.81932000 |
| H  | 7.33865900  | -1.01943400 | -2.00168400 |
| H  | 6.57033000  | -2.44051600 | -1.28264800 |
| H  | 5.91041300  | -1.73892400 | -2.78281400 |
| C  | 3.35036800  | -2.99268200 | 2.10689900  |
| H  | 4.25471200  | -2.40126800 | 1.93951000  |
| H  | 3.28068000  | -3.30051400 | 3.15516100  |
| H  | 3.32672200  | -3.87731800 | 1.46489300  |
| Au | -0.54400000 | -0.17283300 | -0.09174200 |
| C  | -2.60516900 | -0.25489600 | -0.11564800 |
| N  | -3.33720100 | -1.36223200 | -0.36617700 |
| C  | -4.80208800 | 0.23329000  | 0.00079300  |
| C  | -4.69257500 | -1.08389300 | -0.29853000 |
| H  | -5.66398000 | 0.87033200  | 0.15104100  |
| H  | -5.43894900 | -1.84930000 | -0.46632100 |
| N  | -3.50836800 | 0.72398400  | 0.10706800  |
| C  | -3.16448600 | 2.07747000  | 0.44351500  |
| C  | -3.00226900 | 3.00353100  | -0.59206100 |
| C  | -3.00006300 | 2.39847600  | 1.79494200  |
| C  | -2.69375700 | 4.31641100  | -0.23423000 |
| C  | -2.68536300 | 3.72165700  | 2.10530000  |
| C  | -2.54543300 | 4.67328300  | 1.10169800  |
| H  | -2.57633700 | 5.06532300  | -1.01745200 |
| H  | -2.56034000 | 4.00437800  | 3.14985100  |
| H  | -2.31886900 | 5.70588300  | 1.36338100  |
| C  | -2.74764100 | -2.64329500 | -0.64720300 |
| C  | -2.33883600 | -3.43449500 | 0.43015200  |
| C  | -2.56608500 | -3.00638300 | -1.98616000 |
| C  | -1.72327500 | -4.65018000 | 0.12881000  |
| C  | -1.95287300 | -4.23227900 | -2.23833600 |
| C  | -1.53477600 | -5.04571800 | -1.18967700 |
| H  | -1.38847300 | -5.28623100 | 0.94724000  |
| H  | -1.80304700 | -4.54734400 | -3.27050500 |
| H  | -1.06004400 | -6.00156700 | -1.40465000 |
| C  | -2.51838800 | -2.98314900 | 1.84697700  |
| H  | -3.51359600 | -2.55305100 | 2.02425600  |
| H  | -2.37797300 | -3.81884700 | 2.54109600  |
| H  | -1.77170100 | -2.21914800 | 2.10874000  |
| C  | -2.99491400 | -2.09992400 | -3.10029600 |
| H  | -4.07904200 | -1.92096400 | -3.09432800 |
| H  | -2.50969800 | -1.11520100 | -3.02610700 |
| H  | -2.73622700 | -2.52880900 | -4.07440800 |
| C  | -3.11741300 | 2.59451100  | -2.02936700 |
| H  | -4.03620700 | 2.02746400  | -2.23069500 |
| H  | -3.11195100 | 3.47048200  | -2.68739100 |
| H  | -2.27590300 | 1.94903000  | -2.32481400 |
| C  | -3.13778700 | 1.35561400  | 2.86228000  |
| H  | -4.09355700 | 0.81801400  | 2.79529200  |
| H  | -2.34169100 | 0.60020700  | 2.78538800  |
| H  | -3.07506000 | 1.80506000  | 3.85903800  |
| C  | 1.94589900  | 2.25925300  | -0.69117900 |
| C  | 0.86519400  | 2.91095000  | 0.14734600  |
| C  | 2.66685800  | 2.95573600  | -1.58945500 |
| C  | 1.02102600  | 4.42503600  | 0.16276800  |
| H  | -0.13289400 | 2.64862000  | -0.24840600 |
| C  | 2.45129900  | 4.40386400  | -1.88475500 |
| H  | 3.46020600  | 2.44979800  | -2.14312900 |



|   |            |            |             |
|---|------------|------------|-------------|
| C | 1.17256700 | 4.94726500 | -1.25807800 |
| H | 0.15310800 | 4.87615400 | 0.66143400  |
| H | 2.45139800 | 4.55192200 | -2.97486100 |
| H | 0.30369700 | 4.61757300 | -1.85236200 |
| H | 1.17597700 | 6.04434700 | -1.28303600 |
| H | 3.32590200 | 4.97201200 | -1.52166400 |
| H | 1.91092200 | 4.70106600 | 0.75373200  |
| H | 0.89545500 | 2.49330700 | 1.16652200  |

### TS5b

Zero-point correction= 0.699498 (Hartree/Particle)  
 Thermal correction to Energy= 0.744525  
 Thermal correction to Enthalpy= 0.745469  
 Thermal correction to Gibbs Free Energy= 0.619445  
 Sum of electronic and zero-point Energies= -2296.911089  
 Sum of electronic and thermal Energies= -2296.866063  
 Sum of electronic and thermal Enthalpies= -2296.865118  
 Sum of electronic and thermal Free Energies= -2296.991143  
 M06/6-311++G(d,p)-SDD/SMD//M06/6-31G(d)-LANL2DZ energy in DCE solvent = -2298.50217198

Cartesian coordinates:

|    |             |             |             |
|----|-------------|-------------|-------------|
| C  | -5.36857400 | -0.22125600 | 0.91908900  |
| C  | -5.73854900 | 0.67535200  | -0.07776000 |
| C  | -3.98883600 | -0.16113200 | 1.07876000  |
| N  | -3.40209400 | 0.71062400  | 0.26313000  |
| O  | -4.75658000 | 1.29041100  | -0.64128400 |
| H  | -6.04147400 | -0.81080000 | 1.52924400  |
| C  | -7.12091600 | 1.01375400  | -0.50939200 |
| H  | -7.22877200 | 0.86359500  | -1.58984700 |
| H  | -7.85867600 | 0.40052900  | 0.01619800  |
| H  | -7.32543000 | 2.07232900  | -0.30821900 |
| C  | -3.17798100 | -0.92608200 | 2.06408100  |
| H  | -2.75456600 | -1.81256300 | 1.57100100  |
| H  | -2.35100800 | -0.31229000 | 2.44008300  |
| H  | -3.80856500 | -1.26176600 | 2.89296700  |
| C  | -1.42424000 | -0.23856400 | -0.67606200 |
| C  | -2.15849300 | 0.86118200  | -0.25108000 |
| N  | -1.65469700 | 2.17724900  | -0.20623800 |
| S  | -1.43023200 | 2.87925600  | 1.31873700  |
| O  | -1.46350000 | 1.80993800  | 2.30913600  |
| O  | -0.29094500 | 3.77648800  | 1.22010300  |
| Au | 0.62591400  | -0.20331700 | -0.37704200 |
| C  | 2.63341700  | -0.29674100 | 0.10417900  |
| N  | 3.59163600  | 0.64510000  | -0.01073600 |
| C  | 4.58026000  | -1.08812800 | 0.91520900  |
| C  | 4.79946500  | 0.17889100  | 0.48402700  |
| H  | 5.23658000  | -1.81772100 | 1.37134200  |
| H  | 5.68896700  | 0.79537800  | 0.48265100  |
| N  | 3.24313000  | -1.36098100 | 0.67103300  |
| C  | -0.85630300 | 2.71597700  | -1.30996900 |
| H  | -1.21133900 | 2.24565500  | -2.23195000 |
| H  | -1.01207200 | 3.79826200  | -1.38360900 |
| H  | 0.21969500  | 2.52585600  | -1.19142500 |
| C  | -2.05744000 | -1.47129600 | -1.08798600 |
| C  | -3.19241000 | -1.46078400 | -1.83126400 |
| H  | -3.65301700 | -0.50007600 | -2.07075000 |
| C  | -1.35461800 | -2.77266600 | -0.76436800 |
| H  | -0.46710200 | -2.87469000 | -1.41414200 |
| H  | -0.95039500 | -2.73692400 | 0.26169000  |
| C  | 2.54568800  | -2.57524800 | 0.99514100  |

|   |             |             |             |
|---|-------------|-------------|-------------|
| C | 2.57463200  | -3.62352100 | 0.06895900  |
| C | 1.82541800  | -2.62907700 | 2.19315100  |
| C | 1.85744300  | -4.77760700 | 0.38181000  |
| C | 1.12468500  | -3.80543100 | 2.46516500  |
| C | 1.14129800  | -4.86906900 | 1.57039100  |
| H | 1.86687100  | -5.61268700 | -0.31804600 |
| H | 0.56565500  | -3.88259300 | 3.39742600  |
| H | 0.59488100  | -5.78130100 | 1.80378600  |
| C | 3.33747200  | 1.96365400  | -0.52642500 |
| C | 2.83849300  | 2.92714600  | 0.35556400  |
| C | 3.55722900  | 2.19999900  | -1.88741100 |
| C | 2.55700800  | 4.18847900  | -0.17146100 |
| C | 3.26787900  | 3.47643100  | -2.36732800 |
| C | 2.77280200  | 4.46019800  | -1.51700100 |
| H | 2.15442400  | 4.95509500  | 0.48824200  |
| H | 3.43461700  | 3.69587400  | -3.42142300 |
| H | 2.55415700  | 5.45183100  | -1.90932800 |
| C | -2.89647100 | 3.86994700  | 1.51159200  |
| H | -2.83472400 | 4.37228900  | 2.48210800  |
| H | -2.92156200 | 4.60705900  | 0.70306100  |
| H | -3.77271900 | 3.21621100  | 1.46667100  |
| C | 2.59059700  | 2.60842100  | 1.79850300  |
| H | 3.44482600  | 2.09380000  | 2.26006100  |
| H | 2.38807100  | 3.51997400  | 2.36948100  |
| H | 1.71127500  | 1.95668500  | 1.91518500  |
| C | 4.06313100  | 1.11769700  | -2.79260000 |
| H | 5.03432800  | 0.72314500  | -2.46364100 |
| H | 3.36825300  | 0.26554300  | -2.82649400 |
| H | 4.18549600  | 1.48967200  | -3.81551500 |
| C | 3.31721600  | -3.49365800 | -1.22613400 |
| H | 4.38220300  | -3.27212700 | -1.07467400 |
| H | 3.24961400  | -4.41764900 | -1.81036200 |
| H | 2.90746800  | -2.67683200 | -1.83923700 |
| C | 1.76604700  | -1.46099600 | 3.13119700  |
| H | 2.73342000  | -0.95117400 | 3.22926500  |
| H | 1.04426600  | -0.70626300 | 2.77911900  |
| H | 1.44842000  | -1.77876200 | 4.13058300  |
| C | -2.27118100 | -3.97542800 | -0.94121500 |
| H | -1.69530700 | -4.90294700 | -0.82480500 |
| H | -3.03695900 | -3.97908400 | -0.14604300 |
| C | -3.84145000 | -2.68112800 | -2.39275800 |
| H | -4.78481100 | -2.84483300 | -1.83856900 |
| C | -2.95765600 | -3.91975500 | -2.29814000 |
| H | -2.19076700 | -3.88129600 | -3.08777200 |
| H | -3.55255900 | -4.82314700 | -2.48164500 |
| H | -4.15313500 | -2.49330100 | -3.43086200 |

### TS6b

Zero-point correction= 0.699328 (Hartree/Particle)

Thermal correction to Energy= 0.743607

Thermal correction to Enthalpy= 0.744551

Thermal correction to Gibbs Free Energy= 0.619314

Sum of electronic and zero-point Energies= -2296.910165

Sum of electronic and thermal Energies= -2296.865887

Sum of electronic and thermal Enthalpies= -2296.864942

Sum of electronic and thermal Free Energies= -2296.990179

M06/6-311++G(d,p)-SDD/SMD//M06/6-31G(d)-LANL2DZ energy in DCE solvent = -2298.49952571

Cartesian coordinates:

|    |             |             |             |
|----|-------------|-------------|-------------|
| C  | 5.89309300  | 0.09581500  | 0.99386300  |
| C  | 5.93918000  | 0.06440500  | -0.43004000 |
| C  | 4.64752600  | 0.42988200  | 1.43870200  |
| N  | 3.68755200  | 0.73181700  | 0.52031400  |
| O  | 4.86187800  | 0.30532500  | -1.01574000 |
| H  | 6.74770600  | -0.04848200 | 1.64617400  |
| C  | 7.18579000  | -0.22236200 | -1.20251800 |
| H  | 7.26139500  | 0.45762800  | -2.05740800 |
| H  | 8.08232000  | -0.14142300 | -0.58012500 |
| H  | 7.13367800  | -1.24296600 | -1.60365300 |
| C  | 4.29271900  | 0.66362600  | 2.87073500  |
| H  | 4.18187300  | 1.74198500  | 3.04428200  |
| H  | 3.33211600  | 0.20264800  | 3.13209300  |
| H  | 5.08729300  | 0.28939200  | 3.52363400  |
| C  | 1.42477700  | 0.90437500  | -0.22585600 |
| C  | 2.53242700  | 0.16369100  | 0.29396200  |
| N  | 2.42988600  | -1.25891600 | 0.49974200  |
| S  | 1.57398800  | -1.82770700 | 1.83915300  |
| O  | 1.35451500  | -0.68635300 | 2.71932400  |
| O  | 0.46065600  | -2.65971100 | 1.40527700  |
| Au | -0.46289800 | 0.06918100  | -0.27622400 |
| C  | -2.40311800 | -0.64590100 | -0.41406200 |
| N  | -2.87248900 | -1.82031600 | -0.88365000 |
| C  | -4.65246500 | -0.67412700 | -0.28606400 |
| C  | -4.25616500 | -1.85934600 | -0.81268800 |
| H  | -5.63363800 | -0.28107300 | -0.05413500 |
| H  | -4.81713000 | -2.72398600 | -1.14243000 |
| N  | -3.49895100 | 0.05587100  | -0.05065600 |
| C  | 2.32848500  | -2.06932500 | -0.71977200 |
| H  | 3.09521300  | -1.71258100 | -1.41611600 |
| H  | 2.53236800  | -3.12079800 | -0.48714300 |
| H  | 1.33331700  | -2.00632800 | -1.18781100 |
| C  | 1.55013500  | 2.24526200  | -0.70489100 |
| C  | 2.64467300  | 2.63196400  | -1.42736400 |
| H  | 3.47640200  | 1.93914900  | -1.54132200 |
| C  | 0.36192000  | 3.17424700  | -0.55425900 |
| H  | -0.44667100 | 2.84770000  | -1.23214700 |
| H  | -0.05325700 | 3.07533900  | 0.46045300  |
| C  | -3.41582600 | 1.38525900  | 0.48887300  |
| C  | -3.55180200 | 2.46340200  | -0.39233800 |
| C  | -3.13221200 | 1.53377800  | 1.85012200  |
| C  | -3.40451900 | 3.74536300  | 0.13588900  |
| C  | -2.99430800 | 2.83563100  | 2.33386200  |
| C  | -3.12837400 | 3.92943600  | 1.48657400  |
| H  | -3.51041200 | 4.60573400  | -0.52453200 |
| H  | -2.77965000 | 2.98530300  | 3.39137400  |
| H  | -3.02133600 | 4.93711500  | 1.88415700  |
| C  | -2.02282800 | -2.87297500 | -1.36887600 |
| C  | -1.70594100 | -3.91739300 | -0.49609500 |
| C  | -1.52974500 | -2.78131900 | -2.67484100 |
| C  | -0.84578900 | -4.90688200 | -0.97160900 |
| C  | -0.67724900 | -3.79637400 | -3.10813600 |
| C  | -0.33698800 | -4.84776200 | -2.26338100 |
| H  | -0.57491700 | -5.73024800 | -0.31164800 |
| H  | -0.28446200 | -3.75978200 | -4.12385900 |
| H  | 0.32665400  | -5.63367600 | -2.62011300 |
| C  | 2.77083400  | -2.90793900 | 2.59901900  |
| H  | 2.29904500  | -3.34397900 | 3.48529500  |
| H  | 3.03763900  | -3.69991800 | 1.89271900  |
| H  | 3.65419800  | -2.32620500 | 2.87814100  |
| C  | -2.26094400 | -3.96129000 | 0.89414000  |
| H  | -3.33496500 | -4.19576900 | 0.89752600  |
| H  | -1.75078300 | -4.72504200 | 1.49053500  |
| H  | -2.12719000 | -2.99900900 | 1.40646200  |
| C  | -1.88580300 | -1.63203800 | -3.56950000 |
| H  | -2.95866100 | -1.39796800 | -3.53680300 |
| H  | -1.35000400 | -0.71604900 | -3.27632800 |
| H  | -1.62041600 | -1.85124100 | -4.60966900 |

|   |             |             |             |
|---|-------------|-------------|-------------|
| C | -3.81902200 | 2.24464500  | -1.85107400 |
| H | -4.79493000 | 1.77124400  | -2.02657000 |
| H | -3.81203300 | 3.19507100  | -2.39587700 |
| H | -3.06222700 | 1.58785400  | -2.30578700 |
| C | -2.95034600 | 0.34605600  | 2.74669700  |
| H | -3.72540100 | -0.41565600 | 2.58743500  |
| H | -1.97883100 | -0.14266600 | 2.57219400  |
| H | -2.98158300 | 0.64514100  | 3.80003700  |
| C | 2.74919000  | 3.93099400  | -2.14226300 |
| H | 3.52531200  | 4.51876900  | -1.61663300 |
| H | 3.16576600  | 3.76507700  | -3.14718700 |
| C | 0.72725900  | 4.62144800  | -0.85315100 |
| C | 1.44162500  | 4.71243500  | -2.19300400 |
| H | 1.38308400  | 5.01314000  | -0.05862100 |
| H | -0.17986000 | 5.23983000  | -0.84385800 |
| H | 1.63769300  | 5.75437200  | -2.47436300 |
| H | 0.79389000  | 4.29085300  | -2.97788600 |

### TS7b

Zero-point correction= 0.700942 (Hartree/Particle)

Thermal correction to Energy= 0.745683

Thermal correction to Enthalpy= 0.746627

Thermal correction to Gibbs Free Energy= 0.621695

Sum of electronic and zero-point Energies= -2296.928838

Sum of electronic and thermal Energies= -2296.884097

Sum of electronic and thermal Enthalpies= -2296.883153

Sum of electronic and thermal Free Energies= -2297.008085

M06/6-311++G(d,p)-SDD/SMD//M06/6-31G(d)-LANL2DZ energy in DCE solvent = -2298.52473468

Cartesian coordinates:

|    |             |             |             |
|----|-------------|-------------|-------------|
| C  | -2.79582100 | -1.88163500 | 1.24958600  |
| C  | -4.00025700 | -1.79128500 | 0.37635700  |
| C  | -2.00777500 | -0.76082900 | 1.53486800  |
| O  | -4.09690900 | -0.99088600 | -0.53863500 |
| H  | -2.86568800 | -2.62175700 | 2.05277700  |
| C  | -1.28251000 | -0.63364400 | 2.83130800  |
| H  | -1.24952600 | 0.41490800  | 3.14824400  |
| H  | -1.70417900 | -1.25494600 | 3.62708900  |
| H  | -0.23528800 | -0.94283500 | 2.65554800  |
| C  | -5.10202500 | -2.75797200 | 0.71130400  |
| H  | -5.90327700 | -2.68176300 | -0.02826100 |
| H  | -4.72348500 | -3.78958800 | 0.74435900  |
| H  | -5.50736600 | -2.54336100 | 1.70958000  |
| C  | -0.00384100 | -0.79391500 | -0.47594900 |
| C  | -1.12860300 | 0.14392900  | -0.47693700 |
| Au | 1.77856500  | 0.20819400  | -0.12744700 |
| N  | -1.79643500 | 0.19293700  | 0.63769000  |
| C  | 5.02390300  | 2.90540400  | 0.42885100  |
| C  | 5.43538700  | 1.91034700  | 1.25466600  |
| H  | 5.45915400  | 3.86666200  | 0.18894300  |
| H  | 6.30705600  | 1.81523500  | 1.88898600  |
| N  | 3.82955400  | 2.48588500  | -0.13316500 |
| N  | 4.48013800  | 0.90864000  | 1.17258000  |
| C  | 3.49379100  | 1.26118000  | 0.32173000  |
| C  | -0.19808100 | -2.14778000 | -0.30177700 |
| N  | -1.28961100 | 1.07251200  | -1.45997300 |
| C  | -0.44813700 | 1.04632500  | -2.66124400 |
| H  | 0.44386200  | 1.67818100  | -2.54676700 |
| H  | -0.14518300 | 0.01143900  | -2.84424800 |
| H  | -1.03217100 | 1.40550800  | -3.51143500 |
| S  | -2.06847800 | 2.59824200  | -1.11723000 |
| O  | -1.53645800 | 3.10405600  | 0.13467600  |
| O  | -1.91803400 | 3.35046400  | -2.34827000 |
| C  | -1.49836900 | -2.69720900 | -0.46885900 |
| C  | 4.46806800  | -0.32940100 | 1.90266100  |
| C  | 5.01245500  | -1.46659600 | 1.29871600  |

|   |             |             |             |
|---|-------------|-------------|-------------|
| C | 3.85477700  | -0.34510700 | 3.16016800  |
| C | 4.94574000  | -2.66394600 | 2.01224900  |
| C | 3.80966600  | -1.56421900 | 3.83567700  |
| C | 4.35202300  | -2.71223200 | 3.26808000  |
| H | 5.37140900  | -3.56546000 | 1.57270500  |
| H | 3.34777700  | -1.60644400 | 4.82159200  |
| H | 4.31664100  | -3.65359100 | 3.81344500  |
| C | 3.00449700  | 3.21339300  | -1.06090800 |
| C | 3.32082200  | 3.13800300  | -2.42213800 |
| C | 1.88357800  | 3.88866900  | -0.56571500 |
| C | 2.46342100  | 3.78048500  | -3.31469700 |
| C | 1.05204900  | 4.51178600  | -1.49782400 |
| C | 1.33610700  | 4.45515600  | -2.85674200 |
| H | 2.68300700  | 3.74028900  | -4.38114800 |
| H | 0.16190400  | 5.03138900  | -1.14631700 |
| H | 0.66346800  | 4.93538600  | -3.56489100 |
| C | -3.77017600 | 2.13869400  | -0.92322200 |
| H | -3.86785400 | 1.43908900  | -0.09071200 |
| H | -4.31441700 | 3.06915600  | -0.73045000 |
| H | -4.10986300 | 1.67456000  | -1.85303400 |
| C | 1.54761100  | 3.90972200  | 0.89496400  |
| H | 2.44152300  | 3.94239900  | 1.53202700  |
| H | 0.91941300  | 4.77456100  | 1.13423400  |
| H | 0.96836300  | 3.01559700  | 1.17423600  |
| C | 4.51733800  | 2.37177500  | -2.90052200 |
| H | 5.46023600  | 2.81719600  | -2.55408700 |
| H | 4.50393300  | 1.33325900  | -2.53704600 |
| H | 4.55053000  | 2.34397100  | -3.99494300 |
| C | 3.24838700  | 0.89537300  | 3.74368800  |
| H | 3.97349700  | 1.71735100  | 3.81648200  |
| H | 2.41556400  | 1.26336000  | 3.12520800  |
| H | 2.86073200  | 0.70482700  | 4.75035800  |
| C | 5.61276500  | -1.40985900 | -0.07336400 |
| H | 4.83612900  | -1.27242000 | -0.84120200 |
| H | 6.31953600  | -0.57675100 | -0.18447700 |
| H | 6.14757400  | -2.33728300 | -0.30509300 |
| C | -1.76105600 | -4.17796200 | -0.43745200 |
| C | -0.48555400 | -5.01281300 | -0.35732100 |
| C | 0.47879900  | -4.38982900 | 0.64014300  |
| C | 0.95127700  | -3.03900800 | 0.12231600  |
| H | -2.36301700 | -4.44059000 | -1.32009400 |
| H | -0.74008100 | -6.04423000 | -0.08482200 |
| H | -0.02936300 | -4.25980500 | 1.61213600  |
| H | 1.56150700  | -2.51853300 | 0.87650000  |
| H | -2.39800100 | -4.42218400 | 0.42601600  |
| H | -0.00451000 | -5.05844700 | -1.34672600 |
| H | 1.34054000  | -5.04370100 | 0.82229600  |
| H | 1.61848200  | -3.19129700 | -0.74323400 |
| H | -2.19008800 | -2.09198600 | -1.05246000 |

### TS8b

Zero-point correction= 0.699479 (Hartree/Particle)

Thermal correction to Energy= 0.744422

Thermal correction to Enthalpy= 0.745366

Thermal correction to Gibbs Free Energy= 0.620262

Sum of electronic and zero-point Energies= -2296.929204

Sum of electronic and thermal Energies= -2296.884261

Sum of electronic and thermal Enthalpies= -2296.883317

Sum of electronic and thermal Free Energies= -2297.008421

M06/6-311++G(d,p)-SDD/SMD//M06/6-31G(d)-LANL2DZ energy in DCE solvent = -2298.52776123

Cartesian coordinates:

|   |            |             |             |
|---|------------|-------------|-------------|
| C | 1.33013500 | 0.91332700  | 0.23371200  |
| C | 2.25944600 | -0.19108000 | -0.10550700 |
| N | 2.74828000 | -0.26949400 | -1.38181900 |
| S | 3.67423500 | -1.68878200 | -1.87660100 |

|    |             |             |             |
|----|-------------|-------------|-------------|
| O  | 2.87466200  | -2.87904800 | -1.66519300 |
| O  | 4.12979300  | -1.33598600 | -3.20805900 |
| Au | -0.60149800 | 0.16278300  | 0.22622600  |
| C  | -2.43985900 | -0.69674500 | -0.13783700 |
| N  | -2.71580900 | -2.01605400 | -0.23064000 |
| C  | -4.54656500 | -0.97932600 | -0.87609700 |
| C  | -4.01136000 | -2.21040600 | -0.68250200 |
| H  | -5.52281100 | -0.66422700 | -1.22097500 |
| H  | -4.42083800 | -3.20245300 | -0.82133400 |
| N  | -3.56389100 | -0.06416900 | -0.53524200 |
| N  | 2.47463400  | -1.17546600 | 0.72957900  |
| C  | 2.00156000  | -0.96671600 | 1.97884600  |
| C  | 3.20058800  | 1.21331700  | 2.48458100  |
| C  | 2.09137700  | 0.25776200  | 2.62421200  |
| C  | 1.32596100  | -2.13732600 | 2.60615200  |
| H  | 1.09221100  | -1.97364300 | 3.66231800  |
| H  | 0.39832700  | -2.37426100 | 2.06043900  |
| H  | 1.96704400  | -3.02221200 | 2.50229300  |
| O  | 4.13770200  | 1.07758600  | 1.70853800  |
| C  | 3.11831500  | 2.40180500  | 3.40655800  |
| H  | 3.91532600  | 3.11382900  | 3.17206800  |
| H  | 2.13536600  | 2.88861300  | 3.31805200  |
| H  | 3.22046900  | 2.08821900  | 4.45444300  |
| C  | 2.21607800  | 0.54815000  | -2.47294600 |
| H  | 1.14100200  | 0.71849800  | -2.32378300 |
| H  | 2.72495800  | 1.51797600  | -2.53600800 |
| H  | 2.37110800  | 0.02038400  | -3.41638600 |
| H  | 1.50234500  | 0.36898500  | 3.53806100  |
| C  | -3.66311300 | 1.36730300  | -0.62856300 |
| C  | -4.05442400 | 2.08291000  | 0.50659100  |
| C  | -3.31412800 | 1.97345400  | -1.84008800 |
| C  | -4.10437500 | 3.47288900  | 0.39956700  |
| C  | -3.37832200 | 3.36525800  | -1.90017600 |
| C  | -3.77078800 | 4.10736600  | -0.79137200 |
| H  | -4.41447600 | 4.05891000  | 1.26398500  |
| H  | -3.12238500 | 3.86732600  | -2.83261900 |
| H  | -3.82336000 | 5.19245700  | -0.85845300 |
| C  | -1.79255400 | -3.06002300 | 0.13247600  |
| C  | -0.74945300 | -3.38501900 | -0.74290800 |
| C  | -1.97980400 | -3.68883300 | 1.37015800  |
| C  | 0.13423400  | -4.38920000 | -0.34114300 |
| C  | -1.08878800 | -4.70376800 | 1.71581400  |
| C  | -0.04240800 | -5.05079000 | 0.86743000  |
| H  | 0.96945800  | -4.64119700 | -0.99257400 |
| H  | -1.21648000 | -5.21771600 | 2.66802800  |
| H  | 0.64742400  | -5.84205900 | 1.15530300  |
| C  | 5.06143900  | -1.63519400 | -0.76885400 |
| H  | 5.56309300  | -0.67218000 | -0.90011600 |
| H  | 4.71596800  | -1.77106500 | 0.25733300  |
| H  | 5.71912300  | -2.45368800 | -1.07993600 |
| C  | -3.07654600 | -3.26625000 | 2.30147700  |
| H  | -4.07454600 | -3.51028200 | 1.91217700  |
| H  | -2.97496000 | -3.76342900 | 3.27207000  |
| H  | -3.06015300 | -2.17966800 | 2.47549500  |
| C  | -0.56061500 | -2.68834700 | -2.05722500 |
| H  | -1.51462400 | -2.49168800 | -2.56539400 |
| H  | -0.06051200 | -1.71515500 | -1.92221300 |
| H  | 0.07345100  | -3.28307700 | -2.72312200 |
| C  | -4.38380000 | 1.38504800  | 1.79152000  |

|   |             |            |             |
|---|-------------|------------|-------------|
| H | -5.10765600 | 0.57160600 | 1.64687100  |
| H | -3.48692200 | 0.93594700 | 2.24353400  |
| H | -4.80750600 | 2.08510300 | 2.51948800  |
| C | -2.87330500 | 1.15758100 | -3.01804400 |
| H | -1.96872300 | 0.57283300 | -2.78864900 |
| H | -3.64130600 | 0.43752400 | -3.33253500 |
| H | -2.65012600 | 1.79931000 | -3.87714600 |
| C | 1.63948900  | 2.29098100 | 0.13607300  |
| C | 2.90188900  | 2.70407300 | -0.21305700 |
| C | 0.55679200  | 3.30065500 | 0.44991800  |
| C | 3.30160400  | 4.12317500 | -0.34715100 |
| C | 1.11549400  | 4.69217500 | 0.72233100  |
| H | -0.15952800 | 3.33340800 | -0.39067300 |
| C | 2.12164500  | 5.08757100 | -0.34919500 |
| H | 3.98162600  | 4.33297500 | 0.50136000  |
| H | 1.61359300  | 4.70455500 | 1.70646600  |
| H | 2.47741700  | 6.11420100 | -0.20119200 |
| H | 3.93934900  | 4.24340300 | -1.23624400 |
| H | 1.63321600  | 5.06379300 | -1.33602200 |
| H | 0.29620400  | 5.41940700 | 0.77931100  |
| H | -0.02395500 | 2.93855000 | 1.31305500  |
| H | 3.66858700  | 1.95206300 | -0.39700400 |

#### TS9b

Zero-point correction= 0.699036 (Hartree/Particle)  
 Thermal correction to Energy= 0.744650  
 Thermal correction to Enthalpy= 0.745594  
 Thermal correction to Gibbs Free Energy= 0.618291  
 Sum of electronic and zero-point Energies= -2296.919829  
 Sum of electronic and thermal Energies= -2296.874214  
 Sum of electronic and thermal Enthalpies= -2296.873270  
 Sum of electronic and thermal Free Energies= -2297.000573  
 M06/6-311++G(d,p)-SDD/SMD//M06/6-31G(d)-LANL2DZ energy in DCE solvent = -2298.51479111

Cartesian coordinates:

|    |             |             |             |
|----|-------------|-------------|-------------|
| C  | 3.78539600  | 0.78506500  | 2.54332700  |
| C  | 4.85935900  | 1.49760900  | 1.83506700  |
| C  | 2.60070000  | 0.46328100  | 1.98986600  |
| O  | 4.85045700  | 1.66278500  | 0.62057400  |
| H  | 3.96870400  | 0.47193900  | 3.57087900  |
| C  | 1.53894600  | -0.33654600 | 2.66192000  |
| H  | 1.36669700  | -1.25895100 | 2.08209200  |
| H  | 1.83273200  | -0.60742600 | 3.68099000  |
| H  | 0.58543100  | 0.21134300  | 2.69589500  |
| C  | 5.98698800  | 1.99971200  | 2.69187500  |
| H  | 6.72213800  | 2.52765000  | 2.07892300  |
| H  | 5.60822500  | 2.67110300  | 3.47439900  |
| H  | 6.47496800  | 1.16121900  | 3.20796100  |
| C  | 0.87809200  | 1.28889600  | -0.31344500 |
| C  | 2.11171200  | 0.57899900  | -0.49455200 |
| Au | -0.80278600 | 0.08273300  | -0.08119300 |
| N  | 2.25522500  | 0.93351500  | 0.72518900  |
| C  | -3.53406300 | -3.14033800 | 0.35424900  |
| C  | -4.43923500 | -2.13136500 | 0.41516500  |
| H  | -3.64960000 | -4.21456500 | 0.41532900  |
| H  | -5.51411000 | -2.13548400 | 0.54114900  |
| N  | -2.29560800 | -2.54601300 | 0.18179100  |
| N  | -3.72781900 | -0.94851000 | 0.27995600  |
| C  | -2.41075000 | -1.19994900 | 0.13776200  |

|   |             |             |             |
|---|-------------|-------------|-------------|
| N | 2.66789200  | -0.19830200 | -1.42646900 |
| C | 2.01501200  | -0.31397900 | -2.73699600 |
| H | 1.43477300  | -1.24208200 | -2.79102600 |
| H | 1.35427400  | 0.54945900  | -2.86434900 |
| H | 2.76999600  | -0.31070300 | -3.52940300 |
| S | 3.90557500  | -1.37768900 | -1.04359800 |
| O | 3.85449100  | -1.55776200 | 0.39197200  |
| O | 3.66634000  | -2.46774100 | -1.96824900 |
| C | -4.28648700 | 0.37653300  | 0.28076500  |
| C | -4.79873300 | 0.87663100  | -0.92075900 |
| C | -4.25892700 | 1.11074100  | 1.47027700  |
| C | -5.32044900 | 2.16939300  | -0.90515400 |
| C | -4.79270200 | 2.39919000  | 1.43825400  |
| C | -5.32022900 | 2.92229300  | 0.26371700  |
| H | -5.73092300 | 2.58550800  | -1.82443100 |
| H | -4.79516900 | 2.99312000  | 2.35159100  |
| H | -5.73728900 | 3.92754100  | 0.25910700  |
| C | -1.01064400 | -3.18280900 | 0.08117300  |
| C | -0.46431000 | -3.37059600 | -1.19292200 |
| C | -0.31673700 | -3.45810600 | 1.26384100  |
| C | 0.84828900  | -3.83687800 | -1.26366200 |
| C | 0.99093000  | -3.93015600 | 1.14369800  |
| C | 1.57170900  | -4.10588800 | -0.10689700 |
| H | 1.31286500  | -3.98430900 | -2.23836100 |
| H | 1.56126400  | -4.14738800 | 2.04665400  |
| H | 2.60063600  | -4.45069100 | -0.18562900 |
| C | 5.37809800  | -0.51636700 | -1.52399500 |
| H | 5.46644300  | 0.38909200  | -0.91360500 |
| H | 6.21259700  | -1.20242900 | -1.34375000 |
| H | 5.30865000  | -0.28887000 | -2.59234000 |
| C | -0.94265300 | -3.22272300 | 2.60564600  |
| H | -1.79616100 | -3.89135600 | 2.78411200  |
| H | -0.21772900 | -3.39381400 | 3.40958000  |
| H | -1.32056100 | -2.19372100 | 2.70354900  |
| C | -1.24141500 | -3.04265400 | -2.43279500 |
| H | -2.25654100 | -3.46108300 | -2.40895000 |
| H | -1.35147300 | -1.95464500 | -2.56314100 |
| H | -0.73765200 | -3.43614200 | -3.32296400 |
| C | -3.65807200 | 0.55022400  | 2.72422600  |
| H | -3.96143200 | -0.49029600 | 2.90298900  |
| H | -2.55756000 | 0.55887800  | 2.67511200  |
| H | -3.95291300 | 1.14242100  | 3.59742600  |
| C | -4.77335300 | 0.05816300  | -2.17626000 |
| H | -3.75787800 | -0.29747200 | -2.40472900 |
| H | -5.41295600 | -0.83232600 | -2.10245600 |
| H | -5.12441600 | 0.64500900  | -3.03172400 |
| C | 0.78964400  | 2.73086600  | -0.55490300 |
| C | -0.42450100 | 3.44016400  | -0.01218000 |
| C | 1.74121100  | 3.37320400  | -1.25941400 |
| C | -0.26625200 | 4.95496100  | -0.04629200 |
| H | -1.31659200 | 3.13327400  | -0.58837000 |
| C | 1.67004000  | 4.81911000  | -1.62373000 |
| H | 2.63316200  | 2.82338500  | -1.57670200 |
| C | 0.28019400  | 5.40273700  | -1.39513600 |
| H | -1.22692900 | 5.43900900  | 0.17072000  |
| H | 1.98893400  | 4.95433600  | -2.66785300 |
| H | -0.39676300 | 5.05770000  | -2.19318600 |
| H | -0.61111600 | 3.09000200  | 1.01716600  |
| H | 0.43169400  | 5.26693200  | 0.74739100  |



|   |            |            |             |
|---|------------|------------|-------------|
| H | 0.31498400 | 6.49724400 | -1.46344300 |
| H | 2.41848800 | 5.36512200 | -1.02284000 |

**TS10b**

Zero-point correction= 0.698870 (Hartree/Particle)  
 Thermal correction to Energy= 0.744238  
 Thermal correction to Enthalpy= 0.745183  
 Thermal correction to Gibbs Free Energy= 0.617733  
 Sum of electronic and zero-point Energies= -2296.926737  
 Sum of electronic and thermal Energies= -2296.881369  
 Sum of electronic and thermal Enthalpies= -2296.880425  
 Sum of electronic and thermal Free Energies= -2297.007874  
 M06/6-311++G(d,p)-SDD/SMD//M06/6-31G(d)-LANL2DZ energy in DCE solvent = -2298.51977186

Cartesian coordinates:

|    |             |             |             |
|----|-------------|-------------|-------------|
| C  | 0.90696100  | -1.60480200 | 0.17948900  |
| C  | -0.14943600 | -2.62213900 | 0.22711600  |
| N  | -0.25696800 | -3.36530500 | -0.97410700 |
| S  | -1.73549600 | -3.19758400 | -1.83615300 |
| O  | -2.21533600 | -1.84846100 | -1.58607700 |
| O  | -1.44540400 | -3.65441500 | -3.18225900 |
| Au | 0.14712400  | 0.32001800  | 0.06297500  |
| C  | -0.46409900 | 2.28328900  | -0.19319000 |
| N  | -1.69661200 | 2.83119100  | -0.24205500 |
| C  | -0.30411900 | 4.49101800  | -0.62383700 |
| C  | -1.62039000 | 4.18924500  | -0.50839800 |
| H  | 0.20765800  | 5.42266600  | -0.82747800 |
| H  | -2.51054500 | 4.79891100  | -0.59311100 |
| N  | 0.38808700  | 3.30835200  | -0.42652600 |
| N  | -1.13131400 | -2.69607300 | 1.04084200  |
| C  | -1.50540400 | -1.79998400 | 2.02730900  |
| C  | 0.55604100  | -1.82338500 | 3.43224000  |
| C  | -0.81382900 | -1.43865000 | 3.13856800  |
| C  | -2.91820400 | -1.35258200 | 1.82231100  |
| H  | -3.20257400 | -0.56680700 | 2.53113300  |
| H  | -3.04692000 | -0.97760800 | 0.79611700  |
| H  | -3.60523700 | -2.20300600 | 1.93710500  |
| O  | 1.33574000  | -2.18082900 | 2.54814700  |
| C  | 0.99287200  | -1.75930300 | 4.86743900  |
| H  | 0.39117400  | -2.44292600 | 5.48110000  |
| H  | 2.05020600  | -2.02218700 | 4.95706900  |
| H  | 0.82942200  | -0.75002500 | 5.26918300  |
| C  | 0.69130500  | -4.37834500 | -1.41713400 |
| H  | 1.68172600  | -3.93686900 | -1.58840800 |
| H  | 0.77439300  | -5.18980100 | -0.68194600 |
| H  | 0.34197000  | -4.78206200 | -2.37107000 |
| H  | -1.35680700 | -0.88956000 | 3.90857700  |
| C  | 1.81561300  | 3.15327400  | -0.49758400 |
| C  | 2.55897900  | 3.28274200  | 0.67979600  |
| C  | 2.38451200  | 2.84889700  | -1.73860500 |
| C  | 3.93879100  | 3.09794300  | 0.58866000  |
| C  | 3.76787300  | 2.67401000  | -1.78206900 |
| C  | 4.53722600  | 2.79786400  | -0.63031300 |
| H  | 4.54661000  | 3.19906500  | 1.48708100  |
| H  | 4.24201400  | 2.44149600  | -2.73541000 |
| H  | 5.61669400  | 2.66629700  | -0.68440400 |
| C  | -2.93201700 | 2.10910400  | -0.09709400 |
| C  | -3.43380500 | 1.42046100  | -1.20572900 |
| C  | -3.58061500 | 2.15436900  | 1.14159800  |
| C  | -4.65770000 | 0.76732800  | -1.04782200 |

|   |             |             |             |
|---|-------------|-------------|-------------|
| C | -4.80806500 | 1.50265900  | 1.24571900  |
| C | -5.34340100 | 0.81851600  | 0.15923200  |
| H | -5.07131200 | 0.21797500  | -1.89253800 |
| H | -5.34324100 | 1.52912100  | 2.19474200  |
| H | -6.30449800 | 0.31692900  | 0.25689600  |
| C | -2.83907300 | -4.36802200 | -1.07505500 |
| H | -2.39637100 | -5.36533200 | -1.16562900 |
| H | -2.96944700 | -4.08740200 | -0.02683400 |
| H | -3.78394000 | -4.32677500 | -1.62656800 |
| C | -2.95601600 | 2.83953800  | 2.31965400  |
| H | -2.81633000 | 3.91692600  | 2.15557600  |
| H | -3.57684300 | 2.72061900  | 3.21455600  |
| H | -1.96101600 | 2.42157300  | 2.53965200  |
| C | -2.68578000 | 1.35809000  | -2.50197900 |
| H | -2.22027100 | 2.31851200  | -2.76300600 |
| H | -1.88904400 | 0.60090300  | -2.45236600 |
| H | -3.35227200 | 1.06877600  | -3.32169700 |
| C | 1.89440900  | 3.59112000  | 1.98723600  |
| H | 1.30041000  | 4.51399500  | 1.93921300  |
| H | 1.20691700  | 2.78645400  | 2.28754100  |
| H | 2.63620800  | 3.71291200  | 2.78375900  |
| C | 1.53732600  | 2.68864500  | -2.96462900 |
| H | 0.84406000  | 1.83932900  | -2.86587000 |
| H | 0.92144000  | 3.57689700  | -3.16145100 |
| H | 2.15843400  | 2.51174400  | -3.84926000 |
| C | 2.28614400  | -1.83462900 | -0.07744700 |
| C | 2.87890800  | -2.99079200 | 0.35075700  |
| H | 2.25182600  | -3.75605200 | 0.81030500  |
| C | 3.12440700  | -0.72413200 | -0.67416300 |
| H | 3.23870000  | 0.08570300  | 0.06832600  |
| H | 2.58489100  | -0.27455800 | -1.52154100 |
| C | 4.33761900  | -3.25127200 | 0.31498200  |
| H | 4.50703200  | -4.04099900 | -0.44163900 |
| H | 4.64270200  | -3.71387200 | 1.26551600  |
| C | 4.49487300  | -1.21555600 | -1.12133100 |
| H | 5.11217200  | -0.35780800 | -1.41866400 |
| C | 5.16267500  | -2.01158400 | -0.01030800 |
| H | 6.18384000  | -2.30338600 | -0.28368700 |
| H | 5.24278900  | -1.38319700 | 0.89014600  |
| H | 4.38868500  | -1.85179700 | -2.01567500 |

### TS11b

Zero-point correction= 0.699498 (Hartree/Particle)

Thermal correction to Energy= 0.744803

Thermal correction to Enthalpy= 0.745747

Thermal correction to Gibbs Free Energy= 0.617877

Sum of electronic and zero-point Energies= -2296.909197

Sum of electronic and thermal Energies= -2296.863892

Sum of electronic and thermal Enthalpies= -2296.862948

Sum of electronic and thermal Free Energies= -2296.990817

M06/6-311++G(d,p)-SDD/SMD//M06/6-31G(d)-LANL2DZ energy in DCE solvent = -2298.50077968

Cartesian coordinates:

|   |             |             |             |
|---|-------------|-------------|-------------|
| C | -1.60432400 | 0.49199900  | 0.55625300  |
| C | -2.31386700 | -0.44500500 | -0.33611000 |
| N | -1.95414900 | -1.77296500 | -0.33005900 |
| S | -1.51321200 | -2.59811700 | -1.77062500 |
| O | -0.52629500 | -1.82227200 | -2.49791600 |
| O | -1.20076700 | -3.94376900 | -1.32080900 |

|    |             |             |             |
|----|-------------|-------------|-------------|
| Au | 0.44257400  | 0.27216500  | 0.28050100  |
| C  | 2.45624800  | -0.03849700 | -0.02150500 |
| N  | 3.32523200  | 0.79964600  | -0.62103900 |
| C  | 4.47983800  | -1.00931700 | -0.14456000 |
| C  | 4.58127600  | 0.21986500  | -0.70931000 |
| H  | 5.20768700  | -1.79667700 | 0.00165800  |
| H  | 5.41527200  | 0.73702100  | -1.16540800 |
| N  | 3.16610500  | -1.14723500 | 0.27311900  |
| N  | -2.36632100 | 0.24889100  | -1.49525500 |
| C  | -3.27828500 | 1.20027800  | -1.72540500 |
| C  | -4.93189600 | 0.22433600  | -0.23511600 |
| C  | -4.51245200 | 1.26821900  | -1.08434200 |
| C  | -2.92364200 | 2.15752000  | -2.81515900 |
| H  | -2.07366600 | 2.77430200  | -2.48863600 |
| H  | -2.58670400 | 1.60990600  | -3.70353500 |
| H  | -3.75628200 | 2.81450500  | -3.08432600 |
| O  | -4.13482900 | -0.64618800 | 0.23342400  |
| C  | -6.37615800 | 0.06623300  | 0.12126800  |
| H  | -6.48700300 | -0.01004500 | 1.21049500  |
| H  | -6.99106300 | 0.89111300  | -0.25141800 |
| H  | -6.75329200 | -0.87554800 | -0.29760700 |
| C  | -1.67877800 | -2.42040600 | 0.95387200  |
| H  | -2.32608500 | -1.95830800 | 1.70693700  |
| H  | -1.92651900 | -3.48170800 | 0.88233500  |
| H  | -0.62390100 | -2.32100200 | 1.24854600  |
| C  | -2.14019000 | 1.52866000  | 1.35193400  |
| C  | -3.22964400 | 1.32615600  | 2.16093900  |
| H  | -3.82589800 | 0.42069500  | 2.06798900  |
| C  | -1.34966600 | 2.78356100  | 1.61973200  |
| H  | -0.45571600 | 2.83167500  | 0.98259700  |
| H  | -1.97684000 | 3.64650200  | 1.34251900  |
| H  | -5.24524700 | 1.99673900  | -1.42091200 |
| C  | 2.58599900  | -2.30148000 | 0.90626900  |
| C  | 2.49315400  | -2.31491100 | 2.30215600  |
| C  | 2.09860800  | -3.32772100 | 0.08900900  |
| C  | 1.88391800  | -3.42333300 | 2.89037100  |
| C  | 1.48373700  | -4.40901400 | 0.72226700  |
| C  | 1.38169100  | -4.45774800 | 2.10779300  |
| H  | 1.80623400  | -3.46999600 | 3.97620700  |
| H  | 1.07515800  | -5.21226100 | 0.11088900  |
| H  | 0.90708300  | -5.31373800 | 2.58440000  |
| C  | 2.94294300  | 2.09299600  | -1.11864800 |
| C  | 2.37297500  | 2.17188600  | -2.39318500 |
| C  | 3.10603600  | 3.19823300  | -0.27652100 |
| C  | 1.98266300  | 3.43620700  | -2.83766400 |
| C  | 2.70023000  | 4.43976600  | -0.76312700 |
| C  | 2.14724800  | 4.55772400  | -2.03393500 |
| H  | 1.54697000  | 3.53394100  | -3.83160000 |
| H  | 2.82343400  | 5.32140500  | -0.13502000 |
| H  | 1.84407600  | 5.53614100  | -2.40222700 |
| C  | -3.04124800 | -2.62441800 | -2.67943300 |
| H  | -3.80379500 | -3.09586900 | -2.05259800 |
| H  | -3.31390200 | -1.59790800 | -2.94011600 |
| H  | -2.86303700 | -3.21749700 | -3.58242000 |
| C  | 3.65711800  | 3.04351300  | 1.10893700  |
| H  | 4.63521300  | 2.54392800  | 1.11682900  |
| H  | 3.77675400  | 4.01848900  | 1.59358600  |
| H  | 2.98634800  | 2.43655900  | 1.73714400  |
| C  | 2.14381700  | 0.95077300  | -3.23217700 |

|   |             |             |             |
|---|-------------|-------------|-------------|
| H | 2.98019700  | 0.24132100  | -3.17830600 |
| H | 1.24223200  | 0.40711500  | -2.90738400 |
| H | 2.00030600  | 1.22279700  | -4.28381400 |
| C | 3.00149100  | -1.17422300 | 3.13223000  |
| H | 4.00443000  | -0.84922300 | 2.82427600  |
| H | 2.34334400  | -0.29523900 | 3.05041200  |
| H | 3.04896300  | -1.45329100 | 4.19058600  |
| C | 2.23237100  | -3.27116600 | -1.40195800 |
| H | 1.85464700  | -2.32508800 | -1.81329700 |
| H | 3.28095200  | -3.37389200 | -1.71631200 |
| H | 1.65815800  | -4.07764100 | -1.87018400 |
| C | -3.46679900 | 2.27744400  | 3.27435400  |
| H | -3.83617400 | 3.22453400  | 2.84330400  |
| H | -4.24521200 | 1.91951500  | 3.95665500  |
| C | -2.15267300 | 2.56134700  | 4.03659900  |
| H | -2.33446600 | 3.38356600  | 4.73854700  |
| C | -0.96951100 | 2.87874800  | 3.10376500  |
| H | -0.14635800 | 2.17210900  | 3.28932400  |
| H | -0.56872800 | 3.87947300  | 3.30777000  |
| H | -1.92382000 | 1.68057800  | 4.65003900  |

### TS12b

Zero-point correction= 0.758646 (Hartree/Particle)  
 Thermal correction to Energy= 0.816445  
 Thermal correction to Enthalpy= 0.817389  
 Thermal correction to Gibbs Free Energy= 0.669285  
 Sum of electronic and zero-point Energies= -4123.828451  
 Sum of electronic and thermal Energies= -4123.770652  
 Sum of electronic and thermal Enthalpies= -4123.769708  
 Sum of electronic and thermal Free Energies= -4123.917812  
 M06/6-311++G(d,p)-SDD/SMD//M06/6-31G(d)-LANL2DZ energy in DCE solvent = -4125.79080371

Cartesian coordinates:

|    |             |             |             |
|----|-------------|-------------|-------------|
| C  | 1.03690400  | 1.87519600  | 0.70318500  |
| C  | 1.59877300  | 1.31318700  | 1.90517300  |
| N  | 2.90149700  | 0.86764000  | 2.13412900  |
| S  | 3.15365600  | -0.32837400 | 3.36446200  |
| O  | 2.18537600  | -1.40478100 | 3.21747100  |
| O  | 4.57559500  | -0.64251600 | 3.30576800  |
| Au | 0.70852700  | -0.31509700 | 0.07745600  |
| C  | 0.67841600  | -2.25141300 | -0.66063300 |
| N  | -0.15560200 | -3.30976800 | -0.52666700 |
| C  | 1.53161500  | -4.05710500 | -1.72871100 |
| C  | 0.35698700  | -4.42565100 | -1.17195600 |
| H  | 2.25891400  | -4.60035300 | -2.31757300 |
| H  | -0.17834800 | -5.36558200 | -1.16787200 |
| N  | 1.71206500  | -2.72260000 | -1.40574200 |
| N  | 0.71838900  | 1.28740900  | 2.93743300  |
| C  | -0.38886700 | 1.90608600  | 2.52856800  |
| C  | -0.99471800 | 3.66183600  | 0.86939100  |
| C  | -0.32179400 | 2.34687500  | 1.15916700  |
| C  | -1.50892500 | 2.06823600  | 3.48619500  |
| H  | -1.98083500 | 3.05134200  | 3.38743400  |
| H  | -2.29034200 | 1.32631300  | 3.27987300  |
| H  | -1.14367000 | 1.90428300  | 4.50565300  |
| O  | -2.12350500 | 3.85396900  | 1.29259500  |
| C  | -0.29984600 | 4.74397800  | 0.08647900  |
| H  | 0.59419500  | 5.09810300  | 0.61555500  |
| H  | 0.02144900  | 4.38781300  | -0.89768600 |

|   |             |             |             |
|---|-------------|-------------|-------------|
| H | -1.01003400 | 5.56712800  | -0.03714300 |
| C | 3.88942300  | 0.84263000  | 1.05512300  |
| H | 3.45133200  | 0.42939600  | 0.13354800  |
| H | 4.25961800  | 1.85067600  | 0.85046100  |
| H | 4.72540000  | 0.21336000  | 1.36622200  |
| C | 2.87445300  | -1.96802500 | -1.77916800 |
| C | 2.83580600  | -1.21850000 | -2.95985400 |
| C | 3.99793700  | -2.03638100 | -0.94786700 |
| C | 3.98258000  | -0.49993400 | -3.30006200 |
| C | 5.12682800  | -1.31466600 | -1.33800200 |
| C | 5.11737000  | -0.54824800 | -2.49778600 |
| H | 3.97920300  | 0.10120900  | -4.20950400 |
| H | 6.01621500  | -1.34770000 | -0.70861200 |
| H | 6.00480500  | 0.01477600  | -2.78266700 |
| C | -1.41692900 | -3.37959500 | 0.16687900  |
| C | -1.41926800 | -3.41994000 | 1.56703300  |
| C | -2.57633400 | -3.51608100 | -0.60197000 |
| C | -2.64307000 | -3.63323700 | 2.19627600  |
| C | -3.77733900 | -3.72725600 | 0.07615700  |
| C | -3.81100300 | -3.79342100 | 1.46037200  |
| H | -2.67223500 | -3.66523400 | 3.28501500  |
| H | -4.69678300 | -3.81107400 | -0.50285700 |
| H | -4.75726300 | -3.95757700 | 1.97330200  |
| C | 2.86270300  | 0.55154100  | 4.87955600  |
| H | 3.56703300  | 1.38671400  | 4.92344400  |
| H | 1.82531400  | 0.89144600  | 4.88216400  |
| H | 3.06635900  | -0.16542900 | 5.68164700  |
| C | -2.57893100 | -3.42348000 | -2.09945800 |
| H | -2.71419300 | -4.40989300 | -2.56637900 |
| H | -3.41116300 | -2.78622100 | -2.42489800 |
| H | -1.65431200 | -2.98998400 | -2.49910400 |
| C | -0.17984500 | -3.20223500 | 2.37282700  |
| H | 0.71830700  | -3.63405100 | 1.91024200  |
| H | 0.02104000  | -2.12835600 | 2.49939200  |
| H | -0.28373000 | -3.63079300 | 3.37646900  |
| C | 1.60416200  | -1.16386400 | -3.81171600 |
| H | 1.81283400  | -0.66622000 | -4.76572300 |
| H | 1.20837400  | -2.16562500 | -4.03016000 |
| H | 0.79628100  | -0.60691000 | -3.31675000 |
| C | 3.97069200  | -2.81710200 | 0.33104700  |
| H | 3.20136600  | -2.43734500 | 1.02229200  |
| H | 3.74400200  | -3.87917500 | 0.16162500  |
| H | 4.93328200  | -2.75517900 | 0.85076300  |
| C | 1.82886100  | 2.57030500  | -0.35757800 |
| C | 2.69494400  | 3.53418300  | -0.01814600 |
| C | 1.63410100  | 2.16519300  | -1.79596200 |
| C | 3.56482300  | 4.26855700  | -0.99243900 |
| C | 2.24736600  | 3.14619600  | -2.78512700 |
| H | 2.09847100  | 1.17088000  | -1.93899200 |
| C | 3.64443600  | 3.54153300  | -2.32897400 |
| H | 3.16775000  | 5.28944700  | -1.14327300 |
| H | 1.61643700  | 4.04790000  | -2.85778400 |
| H | 4.15063100  | 4.16560800  | -3.07803600 |
| H | 4.57048100  | 4.40688500  | -0.56482000 |
| H | 4.25136400  | 2.62588700  | -2.20708400 |
| H | 2.26680200  | 2.69853300  | -3.78970700 |
| H | 0.56031000  | 2.02748900  | -1.99978000 |
| H | 2.78329800  | 3.81131400  | 1.03758600  |
| H | -1.42278200 | 1.65292200  | 0.43368700  |

|   |             |             |             |
|---|-------------|-------------|-------------|
| N | -2.38786400 | 1.22827700  | -0.22440800 |
| S | -2.66311800 | 1.84771200  | -1.72862400 |
| O | -4.05759800 | 2.12246600  | -1.99024600 |
| O | -1.63007400 | 2.84926500  | -1.92020900 |
| S | -3.32035200 | 0.05227800  | 0.44378200  |
| O | -3.90040000 | -0.77983800 | -0.59451500 |
| O | -2.55351900 | -0.48146700 | 1.55467100  |
| C | -4.74315400 | 0.94382000  | 1.22824100  |
| C | -2.19725600 | 0.44461400  | -2.88796800 |
| F | -1.49553500 | 0.96121800  | -3.88587200 |
| F | -3.27065800 | -0.14321900 | -3.36647900 |
| F | -1.44216400 | -0.45105100 | -2.26319700 |
| F | -5.37536400 | 0.05808300  | 1.98546800  |
| F | -4.29268300 | 1.92882900  | 1.97763200  |
| F | -5.56466400 | 1.40943400  | 0.31465500  |

### TS13b

Zero-point correction= 0.758339 (Hartree/Particle)  
 Thermal correction to Energy= 0.817495  
 Thermal correction to Enthalpy= 0.818439  
 Thermal correction to Gibbs Free Energy= 0.662284  
 Sum of electronic and zero-point Energies= -4123.850936  
 Sum of electronic and thermal Energies= -4123.791781  
 Sum of electronic and thermal Enthalpies= -4123.790836  
 Sum of electronic and thermal Free Energies= -4123.946991  
 M06/6-311++G(d,p)-SDD/SMD//M06/6-31G(d)-LANL2DZ energy in DCE solvent = -4125.81820062

Cartesian coordinates:

|    |             |             |             |
|----|-------------|-------------|-------------|
| C  | -0.18531400 | 1.19296500  | 0.62167600  |
| C  | 0.69056800  | 0.55714800  | -0.33932400 |
| N  | 0.82797600  | 0.78918700  | -1.71563800 |
| S  | 0.52677700  | -0.54688600 | -2.74573900 |
| O  | -0.52455700 | -1.39612100 | -2.18739300 |
| O  | 0.35535700  | 0.00988100  | -4.08031100 |
| Au | -1.91894300 | -0.10021500 | 0.16500800  |
| C  | -3.60583800 | -1.21695400 | -0.06410100 |
| N  | -4.76946300 | -0.83848100 | -0.63372000 |
| C  | -5.10065100 | -2.89016600 | 0.08613300  |
| C  | -5.70696000 | -1.85799100 | -0.55205300 |
| H  | -5.45545500 | -3.87604600 | 0.35616300  |
| H  | -6.70424500 | -1.74878200 | -0.95724900 |
| N  | -3.81067000 | -2.47469900 | 0.37909900  |
| N  | 1.42857500  | -0.41876700 | 0.21172300  |
| C  | 1.10199500  | -0.49344800 | 1.54018900  |
| C  | -0.42950400 | 0.59348400  | 3.20551800  |
| C  | 0.15794600  | 0.46675600  | 1.87071200  |
| C  | 1.76774300  | -1.50265100 | 2.40502000  |
| H  | 2.29220600  | -1.02608100 | 3.24344500  |
| H  | 1.03004200  | -2.17549500 | 2.85941600  |
| H  | 2.47828300  | -2.09737100 | 1.81673600  |
| O  | -0.17814800 | -0.21876000 | 4.08987900  |
| C  | -1.37991800 | 1.73532400  | 3.48516000  |
| H  | -1.65450400 | 1.71114700  | 4.54421400  |
| H  | -0.92839100 | 2.70416200  | 3.23361700  |
| H  | -2.29184600 | 1.64258000  | 2.87619700  |
| C  | 0.46872400  | 2.09228000  | -2.27137000 |
| H  | -0.61495200 | 2.28629500  | -2.21636500 |
| H  | 1.01212800  | 2.85628700  | -1.70970900 |
| H  | 0.77666600  | 2.12391500  | -3.31776300 |

|   |             |             |             |
|---|-------------|-------------|-------------|
| C | -2.76722600 | -3.22740700 | 1.02351100  |
| C | -1.98327500 | -4.06872200 | 0.22781000  |
| C | -2.51187300 | -2.99107600 | 2.37820100  |
| C | -0.91555500 | -4.71895700 | 0.84501500  |
| C | -1.42670700 | -3.65472600 | 2.95026600  |
| C | -0.63852500 | -4.51167000 | 2.19119100  |
| H | -0.28475700 | -5.37951600 | 0.25115500  |
| H | -1.19058500 | -3.47122700 | 3.99829300  |
| H | 0.21042800  | -5.01445600 | 2.65176900  |
| C | -4.93711900 | 0.46854900  | -1.20492800 |
| C | -5.47154700 | 1.47575300  | -0.39467000 |
| C | -4.45706900 | 0.69625700  | -2.49850300 |
| C | -5.54208800 | 2.76152900  | -0.92836700 |
| C | -4.54889700 | 1.99911000  | -2.99165700 |
| C | -5.08378800 | 3.02048400  | -2.21578500 |
| H | -5.95103500 | 3.56697700  | -0.31850500 |
| H | -4.18420800 | 2.20754700  | -3.99710700 |
| H | -5.14176700 | 4.03100600  | -2.61714900 |
| C | 2.04627100  | -1.46378700 | -2.70603600 |
| H | 2.86214000  | -0.78426800 | -2.96552300 |
| H | 2.18214900  | -1.89260800 | -1.70905500 |
| H | 1.94619800  | -2.25202700 | -3.45949700 |
| C | -3.82132900 | -0.39550600 | -3.30379800 |
| H | -4.37572500 | -1.34114200 | -3.23118500 |
| H | -3.76041900 | -0.11515200 | -4.36128000 |
| H | -2.79541300 | -0.60015700 | -2.95758700 |
| C | -5.90547900 | 1.18757400  | 1.01078200  |
| H | -6.71465600 | 0.44534400  | 1.05276800  |
| H | -5.07439900 | 0.78305500  | 1.60868300  |
| H | -6.26190100 | 2.09854900  | 1.50429000  |
| C | -2.24767100 | -4.21733100 | -1.23947200 |
| H | -3.28776700 | -4.50080200 | -1.45154200 |
| H | -2.04716900 | -3.27343500 | -1.76798200 |
| H | -1.59608100 | -4.98312000 | -1.67465200 |
| C | -3.32840500 | -2.02220300 | 3.17807300  |
| H | -3.06527100 | -0.98548300 | 2.91732400  |
| H | -4.40694800 | -2.13678400 | 3.00114900  |
| H | -3.13650500 | -2.14269900 | 4.24971800  |
| C | -0.52104700 | 2.66192400  | 0.59737900  |
| C | 0.46453200  | 3.53449600  | 0.85550300  |
| C | -1.92164300 | 3.13044400  | 0.28968800  |
| C | 0.31349400  | 5.02458200  | 0.79638500  |
| C | -2.13397000 | 4.60782300  | 0.59376100  |
| H | -2.15921800 | 2.92562300  | -0.77171500 |
| C | -0.96494600 | 5.43233300  | 0.07540100  |
| H | 0.31784000  | 5.44079100  | 1.81973400  |
| H | -2.21484500 | 4.74860600  | 1.68543600  |
| H | -1.15088000 | 6.50822200  | 0.19650100  |
| H | 1.19477500  | 5.46067700  | 0.30193500  |
| H | -0.84696600 | 5.24900800  | -1.00631000 |
| H | -3.08663200 | 4.94434600  | 0.16003300  |
| H | -2.65030200 | 2.52090400  | 0.85089500  |
| H | 1.45762300  | 3.14161000  | 1.09210400  |
| H | 2.92375200  | -0.38187200 | -0.09104800 |
| N | 4.02629700  | -0.16031200 | -0.14826900 |
| S | 5.05009200  | -1.47499100 | -0.08091100 |
| O | 6.03048200  | -1.36582400 | 0.97436200  |
| O | 4.15922900  | -2.61226600 | -0.21194600 |
| S | 4.47735800  | 1.43252300  | -0.05310400 |

|   |            |             |             |
|---|------------|-------------|-------------|
| O | 5.85255700 | 1.57066900  | -0.47842300 |
| O | 3.39116300 | 2.21396200  | -0.60700100 |
| C | 4.42968200 | 1.78874700  | 1.75994300  |
| C | 6.00601100 | -1.38828600 | -1.68566400 |
| F | 6.25872300 | -2.63486500 | -2.04254900 |
| F | 7.13117500 | -0.73777100 | -1.52025600 |
| F | 5.27841100 | -0.80278800 | -2.62359700 |
| F | 4.65395300 | 3.08195700  | 1.91537600  |
| F | 3.22618600 | 1.49157100  | 2.22420400  |
| F | 5.34112000 | 1.09052300  | 2.39735700  |

#### TS14b

Zero-point correction= 0.757976 (Hartree/Particle)

Thermal correction to Energy= 0.816204

Thermal correction to Enthalpy= 0.817148

Thermal correction to Gibbs Free Energy= 0.666892

Sum of electronic and zero-point Energies= -4123.794981

Sum of electronic and thermal Energies= -4123.736753

Sum of electronic and thermal Enthalpies= -4123.735809

Sum of electronic and thermal Free Energies= -4123.886065

M06/6-311++G(d,p)-SDD/SMD//M06/6-31G(d)-LANL2DZ energy in DCE solvent = -4125.75867705

Cartesian coordinates:

|    |             |             |             |
|----|-------------|-------------|-------------|
| H  | 2.88292000  | 1.05761500  | 0.08242200  |
| N  | 3.33297700  | 0.10552000  | -0.76225900 |
| S  | 4.14517400  | -1.23663300 | -0.19561000 |
| O  | 4.23133500  | -1.11923500 | 1.24500600  |
| O  | 3.69271800  | -2.47728200 | -0.79575900 |
| S  | 2.80466800  | 0.13068600  | -2.34183200 |
| O  | 2.91399800  | 1.48896800  | -2.83648100 |
| O  | 3.28075400  | -0.98950400 | -3.12310300 |
| C  | 0.99351300  | -0.16108300 | -2.11588500 |
| C  | 5.87185200  | -0.96914800 | -0.81160400 |
| F  | 0.46433700  | -0.52867000 | -3.27060800 |
| F  | 0.80849500  | -1.11994100 | -1.22274200 |
| F  | 0.41227300  | 0.95331900  | -1.70604700 |
| F  | 6.57500200  | -2.03534800 | -0.46236900 |
| F  | 6.39270600  | 0.10499100  | -0.26185500 |
| F  | 5.88196100  | -0.84364600 | -2.12552700 |
| C  | 2.52878300  | 2.19037300  | 0.96845600  |
| C  | 3.95206800  | 2.65658700  | 1.24669500  |
| C  | 1.73213700  | 2.93740000  | 0.04840500  |
| O  | 4.88288800  | 1.88602600  | 1.31074400  |
| C  | 2.37261100  | 3.67898800  | -1.08526200 |
| H  | 1.78042000  | 3.55850200  | -1.99854200 |
| H  | 2.38259800  | 4.75005900  | -0.82964000 |
| H  | 3.39599000  | 3.35056600  | -1.29087500 |
| C  | 4.13648700  | 4.12459000  | 1.56707200  |
| H  | 4.28372700  | 4.69459200  | 0.64031500  |
| H  | 3.25937400  | 4.54518200  | 2.07755900  |
| H  | 5.03280900  | 4.24748900  | 2.18382100  |
| C  | -0.34687600 | 1.06812400  | 1.27079500  |
| C  | -0.49853200 | 2.40863700  | 0.76298400  |
| Au | -1.68611900 | -0.39689200 | 0.62225700  |
| N  | 0.41800900  | 3.11602400  | 0.11814800  |
| C  | -4.58889900 | -3.05017700 | -1.06215400 |
| C  | -3.60194000 | -3.94091100 | -0.79349500 |
| H  | -5.56219000 | -3.17083600 | -1.51919200 |
| H  | -3.52718400 | -5.00584000 | -0.96970000 |



|   |             |             |             |
|---|-------------|-------------|-------------|
| N | -4.13512600 | -1.81444200 | -0.62582800 |
| N | -2.57553700 | -3.22632800 | -0.19700800 |
| C | -2.89611500 | -1.91586800 | -0.09546900 |
| C | 0.80045100  | 0.77468200  | 1.93816200  |
| N | -1.75044600 | 3.02106500  | 0.79072000  |
| C | -2.81404500 | 2.53777700  | 1.67265000  |
| H | -3.46811500 | 1.80307500  | 1.18097000  |
| H | -2.33822500 | 2.06937400  | 2.53767600  |
| H | -3.41872800 | 3.38893200  | 1.99731700  |
| S | -2.30390800 | 3.89107000  | -0.59057800 |
| O | -2.01361600 | 3.11646600  | -1.78576400 |
| O | -3.67703800 | 4.25277300  | -0.26836600 |
| C | 1.76436700  | 1.89202800  | 2.27841900  |
| H | 1.16743200  | 2.80129600  | 2.47058900  |
| C | 1.21765300  | -0.62551400 | 2.27598300  |
| H | 0.34249300  | -1.29059400 | 2.23470800  |
| H | 1.89236700  | -0.97601900 | 1.47642600  |
| C | -1.28659400 | -3.71361800 | 0.21403300  |
| C | -1.06126700 | -3.93309600 | 1.57653900  |
| C | -0.28240000 | -3.81211600 | -0.75414000 |
| C | 0.24032600  | -4.24645700 | 1.96831900  |
| C | 1.00695000  | -4.10893100 | -0.31534700 |
| C | 1.26882500  | -4.31015300 | 1.03459700  |
| H | 0.44791800  | -4.41058700 | 3.02609600  |
| H | 1.82440400  | -4.12666600 | -1.03416500 |
| H | 2.29085100  | -4.50323300 | 1.35724200  |
| C | -4.84579200 | -0.56658000 | -0.65214800 |
| C | -5.76373300 | -0.31805200 | 0.37400800  |
| C | -4.50985900 | 0.37946500  | -1.62612800 |
| C | -6.37652100 | 0.93382400  | 0.40072500  |
| C | -5.13878300 | 1.62290900  | -1.55212500 |
| C | -6.05981600 | 1.89836200  | -0.54953300 |
| H | -7.09220300 | 1.15624700  | 1.19207600  |
| H | -4.87304400 | 2.39128000  | -2.27671600 |
| H | -6.51649400 | 2.88485400  | -0.49860000 |
| C | -1.36519900 | 5.40434700  | -0.61302400 |
| H | -0.33126800 | 5.18049100  | -0.87751900 |
| H | -1.85251100 | 6.03936500  | -1.36058600 |
| H | -1.43301200 | 5.86393400  | 0.37702300  |
| C | -3.47045700 | 0.10646700  | -2.66994500 |
| H | -3.52790300 | -0.91962300 | -3.05750500 |
| H | -3.57046500 | 0.80313300  | -3.50930800 |
| H | -2.46015200 | 0.24870000  | -2.25563800 |
| C | -6.03135000 | -1.34361400 | 1.43442600  |
| H | -6.48447700 | -2.25818600 | 1.02719200  |
| H | -5.10001400 | -1.64809400 | 1.93610700  |
| H | -6.71125600 | -0.94755400 | 2.19697800  |
| C | -0.56944300 | -3.55825600 | -2.20316100 |
| H | -1.15615600 | -4.37287900 | -2.65152300 |
| H | -1.14230400 | -2.63113300 | -2.34832000 |
| H | 0.36287700  | -3.46528000 | -2.77164400 |
| C | -2.15697900 | -3.77296800 | 2.58747700  |
| H | -2.35413100 | -2.70844700 | 2.79029500  |
| H | -3.10444200 | -4.21416900 | 2.24913700  |
| H | -1.88185100 | -4.24510000 | 3.53767600  |
| C | 1.95398600  | -0.76746100 | 3.60645300  |
| C | 2.55245500  | 1.65251400  | 3.57211800  |
| H | 3.36122600  | 2.39162200  | 3.67459000  |
| H | 1.85104800  | 1.86218900  | 4.39796300  |

|   |            |             |            |
|---|------------|-------------|------------|
| C | 3.08629300 | 0.24219900  | 3.74247600 |
| H | 1.23908700 | -0.62707100 | 4.43612100 |
| H | 2.34133800 | -1.79319600 | 3.68788800 |
| H | 3.86364400 | 0.04247100  | 2.99687700 |
| H | 3.55670700 | 0.14947800  | 4.73189600 |

**TS15b**

Zero-point correction= 0.758062 (Hartree/Particle)  
 Thermal correction to Energy= 0.815696  
 Thermal correction to Enthalpy= 0.816640  
 Thermal correction to Gibbs Free Energy= 0.667468  
 Sum of electronic and zero-point Energies= -4123.811775  
 Sum of electronic and thermal Energies= -4123.754141  
 Sum of electronic and thermal Enthalpies= -4123.753197  
 Sum of electronic and thermal Free Energies= -4123.902369  
 M06/6-311++G(d,p)-SDD/SMD//M06/6-31G(d)-LANL2DZ energy in DCE solvent = -4125.78029737

Cartesian coordinates:

|    |             |             |             |
|----|-------------|-------------|-------------|
| H  | -1.20575500 | -0.01795600 | 0.26985700  |
| N  | -1.69594000 | 0.16134600  | 1.40510100  |
| S  | -0.80728100 | 1.08311600  | 2.43728700  |
| O  | 0.17062000  | 1.77845300  | 1.61821500  |
| O  | -1.62927000 | 1.75827100  | 3.41725400  |
| S  | -2.99908900 | -0.72782500 | 1.89904600  |
| O  | -3.44230000 | -1.45511300 | 0.72372500  |
| O  | -2.74784500 | -1.39562500 | 3.16121600  |
| C  | -4.33802500 | 0.52929800  | 2.24091500  |
| C  | 0.19623100  | -0.16899200 | 3.39523300  |
| F  | -5.49526300 | -0.06774500 | 1.97393700  |
| F  | -4.32179800 | 0.89251500  | 3.50217600  |
| F  | -4.19374000 | 1.57487300  | 1.45800900  |
| F  | 1.35167700  | 0.40375700  | 3.72373300  |
| F  | 0.44449100  | -1.22928900 | 2.63709600  |
| F  | -0.41843200 | -0.54294400 | 4.49267900  |
| C  | -3.41759600 | -1.08525000 | -2.40511300 |
| C  | -4.35009100 | -2.21804500 | -2.24833500 |
| C  | -3.66844900 | 0.18954800  | -1.94492700 |
| O  | -3.91595600 | -3.35317200 | -2.10445700 |
| C  | -4.98582800 | 0.68163200  | -1.40236200 |
| H  | -4.84277400 | 1.69742100  | -1.01987400 |
| H  | -5.77369600 | 0.70989000  | -2.16567700 |
| H  | -5.34128700 | 0.05703200  | -0.57506800 |
| C  | -5.84792500 | -2.02849400 | -2.28730100 |
| H  | -6.28736600 | -2.98068500 | -2.60104900 |
| H  | -6.22884900 | -1.80287700 | -1.28289200 |
| H  | -6.17068600 | -1.22820500 | -2.96213800 |
| C  | -0.81342100 | -0.10116600 | -1.14746900 |
| C  | -1.47490500 | 1.09381500  | -1.66218700 |
| Au | 1.24110700  | -0.18021900 | -0.49583100 |
| N  | -2.73916200 | 1.19174100  | -1.96146500 |
| C  | 5.45313100  | 0.19479000  | 0.16609500  |
| C  | 5.30550400  | -1.12201700 | 0.44181500  |
| H  | 6.32108800  | 0.84111500  | 0.16441300  |
| H  | 6.01565700  | -1.88334200 | 0.73669700  |
| N  | 4.19244400  | 0.67712500  | -0.15067200 |
| N  | 3.95887000  | -1.40905000 | 0.28382600  |
| C  | 3.26146900  | -0.30429000 | -0.07640900 |
| C  | -1.20469800 | -1.31263200 | -1.69072800 |
| N  | -0.79438700 | 2.32578300  | -1.63084000 |
| C  | 0.58041100  | 2.49213800  | -2.07899200 |

|   |             |             |             |
|---|-------------|-------------|-------------|
| H | 1.27873900  | 2.61602400  | -1.24309600 |
| H | 0.85755100  | 1.61090100  | -2.66823500 |
| H | 0.65975700  | 3.37671400  | -2.72480700 |
| S | -1.53915000 | 3.68768900  | -0.94897400 |
| O | -2.39571500 | 3.27129600  | 0.14571900  |
| O | -0.45865900 | 4.64245100  | -0.74469400 |
| C | -2.01783100 | -1.34158900 | -2.94996600 |
| H | -1.77116700 | -0.43647100 | -3.52621000 |
| C | -0.90675700 | -2.63479100 | -1.06532600 |
| H | -0.26904500 | -2.51208900 | -0.17567700 |
| H | -1.86736500 | -3.06653400 | -0.73567600 |
| C | 3.36403200  | -2.69428300 | 0.51354400  |
| C | 3.14167500  | -3.53139700 | -0.58359400 |
| C | 3.02722300  | -3.04003400 | 1.82521800  |
| C | 2.54507700  | -4.76664200 | -0.33480300 |
| C | 2.41536000  | -4.27755700 | 2.02442800  |
| C | 2.17634000  | -5.13225000 | 0.95503200  |
| H | 2.36233600  | -5.44258200 | -1.17014100 |
| H | 2.12432000  | -4.56705600 | 3.03365300  |
| H | 1.69847500  | -6.09473700 | 1.12853600  |
| C | 3.91211100  | 2.03865600  | -0.51304700 |
| C | 4.04343900  | 2.40459100  | -1.85641000 |
| C | 3.51028200  | 2.92471300  | 0.49088900  |
| C | 3.75609700  | 3.72699700  | -2.19131400 |
| C | 3.21095700  | 4.23183400  | 0.10510500  |
| C | 3.33398000  | 4.62908400  | -1.22045200 |
| H | 3.84774000  | 4.04195100  | -3.23082000 |
| H | 2.86240000  | 4.93751700  | 0.85743200  |
| H | 3.08450100  | 5.65062200  | -1.50093300 |
| C | -2.57234000 | 4.31895900  | -2.25786200 |
| H | -3.30452800 | 3.54629300  | -2.50647500 |
| H | -3.05338100 | 5.22782600  | -1.88228600 |
| H | -1.93651700 | 4.55412300  | -3.11757800 |
| C | 3.38073100  | 2.47880600  | 1.91374600  |
| H | 4.26805200  | 1.92735600  | 2.25529700  |
| H | 3.23590000  | 3.33784100  | 2.57774400  |
| H | 2.50972900  | 1.82196100  | 2.03865900  |
| C | 4.44126800  | 1.39975900  | -2.89558300 |
| H | 5.42512500  | 0.95540800  | -2.68890300 |
| H | 3.72331800  | 0.56678300  | -2.94102200 |
| H | 4.48515400  | 1.86091700  | -3.88862600 |
| C | 3.32633600  | -2.12088900 | 2.97022800  |
| H | 4.38544300  | -2.17714000 | 3.26156200  |
| H | 3.11473000  | -1.07287300 | 2.72191500  |
| H | 2.72807900  | -2.38407200 | 3.84988200  |
| C | 3.51608700  | -3.10724300 | -1.97120000 |
| H | 2.88878700  | -2.26909900 | -2.31174800 |
| H | 4.55991300  | -2.76778500 | -2.03151400 |
| H | 3.38419600  | -3.93216600 | -2.68074900 |
| C | -0.28154600 | -3.57584000 | -2.09694900 |
| H | 0.65149400  | -3.12336800 | -2.48201400 |
| H | 0.00313600  | -4.51860200 | -1.60905400 |
| C | -1.25838800 | -3.83645700 | -3.23449000 |
| C | -1.74002500 | -2.53718400 | -3.88082400 |
| H | -2.62106600 | -2.72728000 | -4.50949900 |
| H | -0.94780100 | -2.19577200 | -4.56730100 |
| H | -0.78213700 | -4.45851300 | -4.00691000 |
| H | -2.11309200 | -4.39589800 | -2.84246700 |

**6a-TS**

Zero-point correction= 0.561508 (Hartree/Particle)  
Thermal correction to Energy= 0.597608  
Thermal correction to Enthalpy= 0.598552  
Thermal correction to Gibbs Free Energy= 0.491566  
Sum of electronic and zero-point Energies= -1481.995634  
Sum of electronic and thermal Energies= -1481.959535  
Sum of electronic and thermal Enthalpies= -1481.958590  
Sum of electronic and thermal Free Energies= -1482.065576  
M06/6-311++G(d,p)-SDD/SMD//M06/6-31G(d)-LANL2DZ energy in DCE solvent = -1483.31180705

Cartesian coordinates:

|    |             |             |             |
|----|-------------|-------------|-------------|
| C  | -1.13168500 | 2.02762300  | -1.10264300 |
| C  | -0.39568000 | 3.15693500  | -1.49677700 |
| Au | -0.15086700 | 0.29101100  | -0.40349600 |
| C  | 0.69002400  | -1.51443100 | 0.13541000  |
| N  | 1.98717600  | -1.86227100 | 0.27332000  |
| C  | 0.83972800  | -3.67250500 | 0.76801600  |
| C  | 2.10113900  | -3.18882400 | 0.66296500  |
| H  | 0.46237700  | -4.64929900 | 1.04156600  |
| H  | 3.06673200  | -3.65092300 | 0.82273700  |
| N  | -0.01149200 | -2.62896500 | 0.44050800  |
| C  | 0.70980500  | 3.26319900  | 0.59343300  |
| C  | -1.78742000 | 3.14653500  | 1.24703900  |
| C  | -0.39701500 | 2.57676100  | 1.12456400  |
| C  | 2.01521600  | 3.30290100  | 1.32188400  |
| H  | 1.89022000  | 3.32025200  | 2.40994300  |
| H  | 2.61640600  | 2.41504100  | 1.06110400  |
| H  | 2.60118800  | 4.17992200  | 1.02206200  |
| O  | -2.07448600 | 4.26551200  | 0.88332700  |
| C  | -2.76411900 | 2.25165500  | 1.96185300  |
| H  | -3.78026600 | 2.62928700  | 1.81738600  |
| H  | -2.69209700 | 1.21110000  | 1.61555100  |
| H  | -2.54391500 | 2.25286800  | 3.03898000  |
| C  | -2.54177100 | 1.90632200  | -1.45094900 |
| C  | -3.27576600 | 3.02775000  | -1.62172200 |
| H  | -4.33714600 | 2.97867300  | -1.86360100 |
| H  | -2.85156700 | 4.02152500  | -1.49051300 |
| C  | -3.16271700 | 0.54131800  | -1.55600300 |
| H  | -2.63888400 | -0.07771600 | -2.29818100 |
| H  | -3.11196800 | -0.00443400 | -0.60124300 |
| H  | -4.21721100 | 0.60356700  | -1.84889500 |
| C  | -1.44799800 | -2.68604500 | 0.42510400  |
| C  | -2.13956700 | -2.28375900 | 1.57286100  |
| C  | -2.08259200 | -3.10607300 | -0.74805400 |
| C  | -3.53345400 | -2.31181700 | 1.52334700  |
| C  | -3.47758800 | -3.12090000 | -0.75039800 |
| C  | -4.19574700 | -2.72777700 | 0.37322500  |
| H  | -4.10110200 | -2.01094200 | 2.40337900  |
| H  | -4.00157700 | -3.44677400 | -1.64816300 |
| H  | -5.28366200 | -2.75002500 | 0.35434200  |
| C  | 3.09221800  | -0.97049300 | 0.05147000  |
| C  | 3.61797300  | -0.87066800 | -1.24018000 |
| C  | 3.58429200  | -0.24475000 | 1.14119600  |
| C  | 4.69515100  | -0.00338300 | -1.42631400 |
| C  | 4.66326200  | 0.60835400  | 0.90799100  |
| C  | 5.21420500  | 0.72645700  | -0.36373200 |
| H  | 5.13127100  | 0.09182500  | -2.41990400 |
| H  | 5.07584600  | 1.17998400  | 1.73934000  |
| H  | 6.06029900  | 1.39121700  | -0.52668800 |

|   |             |             |             |
|---|-------------|-------------|-------------|
| C | 2.96439600  | -0.36671100 | 2.50082800  |
| H | 3.05348200  | -1.38365000 | 2.90747800  |
| H | 3.44313100  | 0.31638200  | 3.21156900  |
| H | 1.88915000  | -0.13135200 | 2.47604400  |
| C | 3.03663900  | -1.64994200 | -2.38096800 |
| H | 2.92856500  | -2.71676800 | -2.14265200 |
| H | 2.03576100  | -1.27940200 | -2.64783200 |
| H | 3.66771100  | -1.56781300 | -3.27222500 |
| C | -1.41169600 | -1.81884600 | 2.79839600  |
| H | -0.63984000 | -2.53177500 | 3.11884700  |
| H | -0.90019900 | -0.85995900 | 2.62005000  |
| H | -2.10469700 | -1.67652200 | 3.63480500  |
| C | -1.29336200 | -3.50114300 | -1.95930500 |
| H | -0.65048500 | -2.67869000 | -2.30697000 |
| H | -0.63325900 | -4.35667300 | -1.76059800 |
| H | -1.95695400 | -3.78019900 | -2.78459500 |
| H | -0.17911200 | 1.87841100  | 1.94398100  |
| H | -0.61734000 | 3.58444500  | -2.47768800 |
| C | 0.59763800  | 3.73118900  | -0.71373400 |
| H | 1.30264000  | 4.44953400  | -1.12947800 |

#### 7a-TS

Zero-point correction= 0.561853 (Hartree/Particle)  
 Thermal correction to Energy= 0.598228  
 Thermal correction to Enthalpy= 0.599173  
 Thermal correction to Gibbs Free Energy= 0.488581  
 Sum of electronic and zero-point Energies= -1481.971887  
 Sum of electronic and thermal Energies= -1481.935511  
 Sum of electronic and thermal Enthalpies= -1481.934567  
 Sum of electronic and thermal Free Energies= -1482.045159

M06/6-311++G(d,p)-SDD/SMD//M06/6-31G(d)-LANL2DZ energy in DCE solvent = -1483.28735339

Cartesian coordinates:

|    |             |             |             |
|----|-------------|-------------|-------------|
| C  | 5.39674400  | -0.21568600 | 0.36035500  |
| C  | 5.85017900  | -0.87105900 | -0.92829400 |
| C  | 4.65983400  | -0.93244400 | 1.28565200  |
| O  | 5.33689900  | -1.87501300 | -1.36733200 |
| H  | 6.09451400  | 0.53164000  | 0.75123400  |
| C  | 4.94636500  | -0.81349300 | 2.75444800  |
| H  | 5.00116200  | -1.80965800 | 3.21468300  |
| H  | 5.88678400  | -0.29155500 | 2.95677100  |
| H  | 4.13583600  | -0.27748900 | 3.26947100  |
| C  | 7.03072400  | -0.20391900 | -1.57583800 |
| H  | 7.22537200  | -0.65440900 | -2.55234300 |
| H  | 6.86690600  | 0.87741300  | -1.68219700 |
| H  | 7.92119500  | -0.32684500 | -0.94367500 |
| C  | 1.96827500  | -0.25687800 | -0.12879300 |
| C  | 2.51223000  | -1.54069300 | 0.08290400  |
| Au | -0.10784300 | -0.09664200 | -0.05031600 |
| C  | -4.39394900 | -0.07888800 | 0.06528100  |
| C  | -4.14167900 | 1.25256000  | 0.09196800  |
| H  | -5.32052500 | -0.63810100 | 0.07648600  |
| H  | -4.79944900 | 2.11098600  | 0.13411400  |
| N  | -3.16399600 | -0.71591600 | 0.01178000  |
| N  | -2.76372500 | 1.39232500  | 0.05475200  |
| C  | -2.15790500 | 0.18407800  | 0.00463100  |
| C  | 2.71308200  | 0.93788700  | -0.21262600 |
| C  | 3.88269900  | 0.96437800  | -0.95421300 |
| C  | 2.20671600  | 2.19350400  | 0.44131700  |

|   |             |             |             |
|---|-------------|-------------|-------------|
| H | 1.38851500  | 2.64126300  | -0.14316800 |
| H | 1.80538200  | 1.99359000  | 1.44371800  |
| H | 3.00337700  | 2.94263700  | 0.52318300  |
| C | -2.04873400 | 2.63908600  | 0.04151700  |
| C | -1.80179800 | 3.24246500  | -1.19651700 |
| C | -1.61074700 | 3.17146900  | 1.25795600  |
| C | -1.08526600 | 4.43916300  | -1.19380100 |
| C | -0.90051100 | 4.37166200  | 1.21216000  |
| C | -0.64104200 | 4.99948400  | -0.00080200 |
| H | -0.88184800 | 4.93624600  | -2.14157300 |
| H | -0.55375900 | 4.81676400  | 2.14425400  |
| H | -0.09183700 | 5.93908500  | -0.01668900 |
| C | -2.97908700 | -2.14037800 | -0.05509300 |
| C | -2.87122800 | -2.73411500 | -1.31615500 |
| C | -2.91340400 | -2.85725900 | 1.14354500  |
| C | -2.70003400 | -4.11769600 | -1.35730200 |
| C | -2.73912300 | -4.23766500 | 1.05308100  |
| C | -2.63572100 | -4.86170000 | -0.18506300 |
| H | -2.61922700 | -4.61212800 | -2.32463800 |
| H | -2.68809800 | -4.82583600 | 1.96862800  |
| H | -2.50643100 | -5.94107900 | -0.23688900 |
| C | -3.01808000 | -2.16437200 | 2.46865000  |
| H | -3.98323000 | -1.65342300 | 2.59132400  |
| H | -2.91549400 | -2.87897800 | 3.29226900  |
| H | -2.23661900 | -1.39930600 | 2.58670000  |
| C | -2.91469200 | -1.91554800 | -2.57130600 |
| H | -3.75092900 | -1.20300000 | -2.57573600 |
| H | -1.99361100 | -1.32643200 | -2.69478400 |
| H | -3.01571100 | -2.55757300 | -3.45294400 |
| C | -1.86421800 | 2.46585700  | 2.55581400  |
| H | -2.90959800 | 2.14554400  | 2.65878000  |
| H | -1.24553200 | 1.55937600  | 2.64334800  |
| H | -1.62606200 | 3.11386400  | 3.40629600  |
| C | -2.27722300 | 2.61630300  | -2.47255400 |
| H | -1.85487600 | 1.60975400  | -2.60851100 |
| H | -3.37027200 | 2.50706000  | -2.49511300 |
| H | -1.98655900 | 3.22166600  | -3.33764000 |
| H | 4.40034800  | 1.91114000  | -1.12337100 |
| H | 4.04219600  | 0.19364800  | -1.70096800 |
| H | 1.83791000  | -2.38464900 | -0.07048400 |
| C | 3.61588700  | -1.80973100 | 0.89614700  |
| H | 3.52884700  | -2.72952900 | 1.48492000  |

### 6b-TS

Zero-point correction= 0.550164 (Hartree/Particle)

Thermal correction to Energy= 0.585821

Thermal correction to Enthalpy= 0.586766

Thermal correction to Gibbs Free Energy= 0.481373

Sum of electronic and zero-point Energies= -1498.043617

Sum of electronic and thermal Energies= -1498.007959

Sum of electronic and thermal Enthalpies= -1498.007015

Sum of electronic and thermal Free Energies= -1498.112408

M06/6-311++G(d,p)-SDD/SMD//M06/6-31G(d)-LANL2DZ energy in DCE solvent = -1499.35331680

Cartesian coordinates:

|    |             |             |             |
|----|-------------|-------------|-------------|
| C  | -1.29030700 | 1.92108500  | -1.05511800 |
| C  | -0.62712500 | 3.12658400  | -1.45395400 |
| Au | -0.18066800 | 0.25146300  | -0.45556000 |
| C  | 0.77877100  | -1.48800600 | 0.10733900  |

|   |             |             |             |
|---|-------------|-------------|-------------|
| N | 2.09242600  | -1.75642900 | 0.26212000  |
| C | 1.04903800  | -3.63161900 | 0.74695200  |
| C | 2.28047700  | -3.07318300 | 0.65481700  |
| H | 0.72775200  | -4.62872300 | 1.01881100  |
| H | 3.27004500  | -3.47661200 | 0.82636200  |
| N | 0.14122000  | -2.64148000 | 0.40713100  |
| N | 0.36556000  | 3.69774600  | -0.82464300 |
| C | 0.55555900  | 3.22387800  | 0.41970900  |
| C | -1.88367500 | 3.26802500  | 1.30074300  |
| C | -0.50340400 | 2.70874600  | 1.17435700  |
| C | 1.96822500  | 3.15924100  | 0.88835900  |
| H | 2.05557500  | 2.85580500  | 1.93660500  |
| H | 2.53709300  | 2.45318000  | 0.26285300  |
| H | 2.43575700  | 4.14265700  | 0.75331100  |
| O | -2.22488900 | 4.31975600  | 0.80006800  |
| C | -2.80180600 | 2.44567600  | 2.16446700  |
| H | -3.83151700 | 2.79398400  | 2.04472700  |
| H | -2.72950600 | 1.37609100  | 1.91611200  |
| H | -2.51816700 | 2.55215700  | 3.22096000  |
| C | -2.71117600 | 1.76834400  | -1.28533900 |
| C | -3.47895700 | 2.87116000  | -1.46969100 |
| H | -4.55370100 | 2.78967900  | -1.63115500 |
| H | -3.07123400 | 3.87984100  | -1.44253800 |
| C | -3.31715700 | 0.39245900  | -1.27103000 |
| H | -2.84391000 | -0.25344400 | -2.02395000 |
| H | -3.17702000 | -0.10392300 | -0.29859300 |
| H | -4.39316100 | 0.42472500  | -1.47766700 |
| C | -1.29017300 | -2.77790700 | 0.40181200  |
| C | -1.99592200 | -2.38490300 | 1.54462100  |
| C | -1.90788000 | -3.26664100 | -0.75365000 |
| C | -3.38583200 | -2.50068200 | 1.51001200  |
| C | -3.29918900 | -3.36921600 | -0.74065500 |
| C | -4.03072700 | -2.99131900 | 0.37951800  |
| H | -3.96349700 | -2.21216900 | 2.38769200  |
| H | -3.80946300 | -3.75212500 | -1.62362600 |
| H | -5.11508100 | -3.08413500 | 0.37345000  |
| C | 3.14614100  | -0.79482300 | 0.08302500  |
| C | 3.64905400  | -0.58464600 | -1.20464900 |
| C | 3.61560400  | -0.11813800 | 1.21376300  |
| C | 4.67832700  | 0.34750800  | -1.34261300 |
| C | 4.65188800  | 0.79683200  | 1.02895100  |
| C | 5.17940500  | 1.02600400  | -0.23743500 |
| H | 5.09570300  | 0.53105000  | -2.33180300 |
| H | 5.04367700  | 1.33538600  | 1.89160000  |
| H | 5.99016900  | 1.74070600  | -0.36443100 |
| C | 3.00827500  | -0.35019700 | 2.56454100  |
| H | 3.15356600  | -1.38117500 | 2.91568400  |
| H | 3.45070500  | 0.31712900  | 3.31247200  |
| H | 1.92148900  | -0.17282500 | 2.55097900  |
| C | 3.10145000  | -1.32528500 | -2.38716200 |
| H | 3.06279200  | -2.40919400 | -2.21229300 |
| H | 2.07643200  | -1.00360900 | -2.62396100 |
| H | 3.71661600  | -1.15073100 | -3.27618900 |
| C | -1.29082400 | -1.83953100 | 2.75056000  |
| H | -0.43996300 | -2.46452400 | 3.05414700  |
| H | -0.88891800 | -0.83202300 | 2.55767900  |
| H | -1.97459900 | -1.76675200 | 3.60335800  |
| C | -1.10680100 | -3.63847900 | -1.96444100 |
| H | -0.52216800 | -2.78381000 | -2.33707900 |

|   |             |             |             |
|---|-------------|-------------|-------------|
| H | -0.39087400 | -4.44503500 | -1.75534300 |
| H | -1.75897400 | -3.97772600 | -2.77609600 |
| H | -0.21194600 | 2.09535400  | 2.03441000  |
| H | -0.91378700 | 3.56250700  | -2.41690800 |

### 7b-TS

|                                              |                             |
|----------------------------------------------|-----------------------------|
| Zero-point correction=                       | 0.550521 (Hartree/Particle) |
| Thermal correction to Energy=                | 0.586607                    |
| Thermal correction to Enthalpy=              | 0.587551                    |
| Thermal correction to Gibbs Free Energy=     | 0.478201                    |
| Sum of electronic and zero-point Energies=   | -1498.035050                |
| Sum of electronic and thermal Energies=      | -1497.998964                |
| Sum of electronic and thermal Enthalpies=    | -1497.998020                |
| Sum of electronic and thermal Free Energies= | -1498.107370                |

M06/6-311++G(d,p)-SDD/SMD//M06/6-31G(d)-LANL2DZ energy in DCE solvent = -1499.34341766

Cartesian coordinates:

|    |             |             |             |
|----|-------------|-------------|-------------|
| C  | 5.26818100  | -0.36231200 | 0.54237100  |
| C  | 6.10373600  | -1.46375300 | -0.02698900 |
| C  | 4.04790700  | -0.58145800 | 1.16657100  |
| O  | 5.61567800  | -2.47791400 | -0.48758400 |
| H  | 5.81361200  | 0.52322800  | 0.87586400  |
| C  | 3.48321100  | 0.39159800  | 2.14534700  |
| H  | 3.13840200  | -0.13057400 | 3.04560100  |
| H  | 4.19911600  | 1.16970700  | 2.42405700  |
| H  | 2.59255700  | 0.86268100  | 1.69085200  |
| C  | 7.58550200  | -1.22479200 | 0.02489600  |
| H  | 8.11126900  | -2.04052200 | -0.47772400 |
| H  | 7.84267000  | -0.26703100 | -0.44832400 |
| H  | 7.92558500  | -1.16216000 | 1.06774000  |
| C  | 1.84503900  | -0.62363400 | -0.67186500 |
| C  | 2.35794600  | -1.78799700 | 0.03116800  |
| Au | -0.14178300 | -0.21354500 | -0.27500000 |
| N  | 3.28425500  | -1.65487300 | 0.91331200  |
| C  | -4.30862400 | 0.48188600  | 0.49421700  |
| C  | -3.82705300 | 1.74872900  | 0.53328900  |
| H  | -5.30781100 | 0.08580300  | 0.62158200  |
| H  | -4.31343000 | 2.70029400  | 0.70444900  |
| N  | -3.22849400 | -0.34764800 | 0.23709400  |
| N  | -2.46503600 | 1.65784300  | 0.29873700  |
| C  | -2.09269500 | 0.37037500  | 0.11646400  |
| C  | 2.70347700  | 0.29069300  | -1.26874200 |
| C  | 4.04623900  | -0.07595100 | -1.46655600 |
| C  | 2.22997100  | 1.66724800  | -1.65506000 |
| H  | 1.42739100  | 1.60198200  | -2.40211600 |
| H  | 1.81839300  | 2.21412100  | -0.79372800 |
| H  | 3.03686300  | 2.26887900  | -2.08973600 |
| C  | -1.53848800 | 2.75599600  | 0.25632500  |
| C  | -1.33570400 | 3.40512500  | -0.96589700 |
| C  | -0.85440600 | 3.09244500  | 1.42929300  |
| C  | -0.40464300 | 4.44350500  | -0.99259600 |
| C  | 0.06795800  | 4.13657800  | 1.35461700  |
| C  | 0.28913600  | 4.80678500  | 0.15636300  |
| H  | -0.22874900 | 4.97243300  | -1.92864100 |
| H  | 0.60855800  | 4.43018000  | 2.25395700  |
| H  | 1.00546500  | 5.62544500  | 0.11890100  |
| C  | -3.29916000 | -1.77970200 | 0.12009600  |
| C  | -3.48681500 | -2.33452700 | -1.14910400 |
| C  | -3.16995200 | -2.54225800 | 1.28503200  |



|   |             |             |             |
|---|-------------|-------------|-------------|
| C | -3.55668300 | -3.72508600 | -1.23259000 |
| C | -3.24449600 | -3.92804600 | 1.15232200  |
| C | -3.43795000 | -4.51324700 | -0.09397600 |
| H | -3.70827000 | -4.18943700 | -2.20625200 |
| H | -3.15138300 | -4.55095200 | 2.04110800  |
| H | -3.49900700 | -5.59651400 | -0.17829400 |
| C | -2.94987500 | -1.89221300 | 2.61779500  |
| H | -3.77269900 | -1.21571400 | 2.88793900  |
| H | -2.86550800 | -2.64382800 | 3.40986800  |
| H | -2.02876100 | -1.29078700 | 2.62545900  |
| C | -3.58770200 | -1.47228300 | -2.37126400 |
| H | -4.30514700 | -0.65028000 | -2.24296200 |
| H | -2.61805200 | -1.01445400 | -2.61809200 |
| H | -3.90397600 | -2.06066400 | -3.23921400 |
| C | -1.08338700 | 2.34502900  | 2.70858000  |
| H | -2.15110300 | 2.23867400  | 2.94271800  |
| H | -0.66837500 | 1.32664400  | 2.65676200  |
| H | -0.60542900 | 2.85678000  | 3.55101400  |
| C | -2.07479600 | 2.98471500  | -2.20010500 |
| H | -1.87992100 | 1.93044800  | -2.44749800 |
| H | -3.16259200 | 3.08533000  | -2.08353100 |
| H | -1.77678000 | 3.59270300  | -3.06093300 |
| H | 4.74738500  | 0.63216700  | -1.90987600 |
| H | 4.31838700  | -1.12743200 | -1.51957000 |
| H | 1.84648000  | -2.75173100 | -0.02974000 |

#### 6c-TS

Zero-point correction= 0.577525 (Hartree/Particle)

Thermal correction to Energy= 0.615013

Thermal correction to Enthalpy= 0.615957

Thermal correction to Gibbs Free Energy= 0.506018

Sum of electronic and zero-point Energies= -1537.305996

Sum of electronic and thermal Energies= -1537.268509

Sum of electronic and thermal Enthalpies= -1537.267564

Sum of electronic and thermal Free Energies= -1537.377504

M06/6-311++G(d,p)-SDD/SMD//M06/6-31G(d)-LANL2DZ energy in DCE solvent = -1538.65252571

Cartesian coordinates:

|    |             |             |             |
|----|-------------|-------------|-------------|
| C  | 1.84447800  | -1.32300500 | -0.85777000 |
| C  | 1.59186600  | -2.70030300 | -1.25555000 |
| Au | 0.22276600  | -0.10258100 | -0.38793600 |
| C  | -1.28234000 | 1.23866900  | 0.07382100  |
| N  | -2.61384800 | 1.06287100  | 0.21427300  |
| C  | -2.26401400 | 3.20123400  | 0.59155900  |
| C  | -3.23697900 | 2.26011500  | 0.53187700  |
| H  | -2.29756500 | 4.26133900  | 0.80691100  |
| H  | -4.30739900 | 2.31797900  | 0.68129500  |
| N  | -1.07256400 | 2.55404100  | 0.30781000  |
| N  | 0.79954600  | -3.49372200 | -0.58889000 |
| C  | 0.45357000  | -3.08665500 | 0.65017300  |
| C  | 2.79618600  | -2.56364400 | 1.57937200  |
| C  | 1.32458200  | -2.40842800 | 1.49168200  |
| C  | -0.96027900 | -3.36370200 | 1.03577800  |
| H  | -1.19607700 | -3.01825000 | 2.04784400  |
| H  | -1.64975800 | -2.88909300 | 0.32167300  |
| H  | -1.14124800 | -4.44489100 | 0.97399400  |
| O  | 3.42523900  | -3.40839600 | 0.96716200  |
| C  | 3.46061800  | -1.61167700 | 2.53829800  |
| H  | 4.54748800  | -1.67928200 | 2.43811800  |
| H  | 3.12494600  | -0.57958400 | 2.35481800  |

|   |             |             |             |
|---|-------------|-------------|-------------|
| H | 3.18581100  | -1.85772300 | 3.57334100  |
| C | 3.14902000  | -0.71631300 | -0.95985400 |
| C | 4.26111700  | -1.49134800 | -1.05139400 |
| H | 5.25505200  | -1.04397300 | -1.07064900 |
| H | 4.22236400  | -2.57627700 | -1.07809400 |
| C | 3.26930600  | 0.78140900  | -0.87503600 |
| H | 2.66868300  | 1.27298500  | -1.65292600 |
| H | 2.90291400  | 1.16304300  | 0.08995800  |
| H | 4.30930600  | 1.10841000  | -0.99066100 |
| C | 0.22418000  | 3.17458300  | 0.28822900  |
| C | 1.00780500  | 3.11112000  | 1.44537400  |
| C | 0.64332800  | 3.79842000  | -0.89146400 |
| C | 2.26229600  | 3.72081500  | 1.40286900  |
| C | 1.90552200  | 4.39238500  | -0.88779800 |
| C | 2.70540200  | 4.35775800  | 0.24897600  |
| H | 2.89150300  | 3.69954900  | 2.29216900  |
| H | 2.25803400  | 4.89099700  | -1.78990100 |
| H | 3.68312400  | 4.83568500  | 0.23665700  |
| C | -3.29517700 | -0.19630200 | 0.08440300  |
| C | -3.68535600 | -0.61719000 | -1.19073000 |
| C | -3.54626800 | -0.92983200 | 1.24851200  |
| C | -4.36644000 | -1.83178800 | -1.28045600 |
| C | -4.23943300 | -2.13218800 | 1.11116900  |
| C | -4.64734000 | -2.57785700 | -0.14136400 |
| H | -4.68837000 | -2.18598500 | -2.25890600 |
| H | -4.45487900 | -2.72416800 | 2.00043100  |
| H | -5.18993500 | -3.51691800 | -0.23096900 |
| C | -3.05990000 | -0.45458700 | 2.58461000  |
| H | -3.50670800 | 0.50666300  | 2.87386100  |
| H | -3.30223400 | -1.17959400 | 3.36961000  |
| H | -1.96834400 | -0.30694700 | 2.58352300  |
| C | -3.38020400 | 0.20060700  | -2.40924700 |
| H | -3.69460900 | 1.24681600  | -2.29191400 |
| H | -2.30148900 | 0.21441400  | -2.62466600 |
| H | -3.88900900 | -0.20570100 | -3.28978000 |
| C | 0.53693600  | 2.39012000  | 2.67307600  |
| H | -0.50214800 | 2.63632700  | 2.93049400  |
| H | 0.57908000  | 1.29748000  | 2.53276400  |
| H | 1.16450600  | 2.63733700  | 3.53631300  |
| C | -0.22243900 | 3.80663500  | -2.11484000 |
| H | -0.47401700 | 2.78466100  | -2.43598300 |
| H | -1.17407200 | 4.32850800  | -1.94447100 |
| H | 0.28297900  | 4.30550300  | -2.94844900 |
| H | 0.87168900  | -1.94466000 | 2.37400800  |
| C | 2.12276900  | -3.21525100 | -2.56145800 |
| H | 2.92656700  | -3.93805700 | -2.36260600 |
| H | 1.32535300  | -3.76366000 | -3.07384800 |
| H | 2.50919200  | -2.42699800 | -3.21362200 |

### 7c-TS

|                                              |                             |
|----------------------------------------------|-----------------------------|
| Zero-point correction=                       | 0.578218 (Hartree/Particle) |
| Thermal correction to Energy=                | 0.615981                    |
| Thermal correction to Enthalpy=              | 0.616925                    |
| Thermal correction to Gibbs Free Energy=     | 0.504534                    |
| Sum of electronic and zero-point Energies=   | -1537.302814                |
| Sum of electronic and thermal Energies=      | -1537.265051                |
| Sum of electronic and thermal Enthalpies=    | -1537.264107                |
| Sum of electronic and thermal Free Energies= | -1537.376499                |

M06/6-311++G(d,p)-SDD/SMD//M06/6-31G(d)-LANL2DZ energy in DCE solvent = -1538.64851749

Cartesian coordinates:

|    |             |             |             |
|----|-------------|-------------|-------------|
| C  | 5.26650900  | 0.65461300  | 0.78542900  |
| C  | 6.21568700  | 0.09653500  | -0.22133700 |
| C  | 4.14883200  | -0.03677100 | 1.23498200  |
| O  | 5.86803600  | -0.68717700 | -1.08612300 |
| H  | 5.68875300  | 1.37772700  | 1.48633800  |
| C  | 3.52484400  | 0.25778200  | 2.55760000  |
| H  | 3.38342700  | -0.66901500 | 3.12620200  |
| H  | 4.11347000  | 0.96228700  | 3.15177000  |
| H  | 2.51954600  | 0.67767600  | 2.38197700  |
| C  | 7.63611700  | 0.56553000  | -0.07951500 |
| H  | 8.24090200  | 0.17450200  | -0.90166900 |
| H  | 7.68508400  | 1.66316200  | -0.06890800 |
| H  | 8.05766200  | 0.22251000  | 0.87532100  |
| C  | 1.86550200  | 0.31454800  | -0.47963300 |
| C  | 2.63323400  | -0.92525400 | -0.38631600 |
| Au | -0.15674900 | 0.07245100  | -0.13940400 |
| N  | 3.55835500  | -0.98956600 | 0.50791500  |
| C  | -4.23724500 | -1.11420400 | 0.25739800  |
| C  | -4.40539300 | 0.23151800  | 0.25366400  |
| H  | -4.94694900 | -1.92874100 | 0.32200100  |
| H  | -5.29362400 | 0.84691800  | 0.31498800  |
| N  | -2.87476200 | -1.34313400 | 0.15180600  |
| N  | -3.14094400 | 0.78817100  | 0.14705900  |
| C  | -2.19787600 | -0.17629300 | 0.08421100  |
| C  | 2.49132100  | 1.55146900  | -0.58705800 |
| C  | 3.85475500  | 1.59505100  | -0.91106800 |
| C  | 1.73547000  | 2.82448300  | -0.30827800 |
| H  | 0.81780500  | 2.87267200  | -0.91036700 |
| H  | 1.42458400  | 2.88070100  | 0.74471500  |
| H  | 2.33269100  | 3.71514600  | -0.53544100 |
| C  | -2.84346700 | 2.19344200  | 0.07188200  |
| C  | -2.79443700 | 2.78949400  | -1.19259800 |
| C  | -2.59022900 | 2.88583500  | 1.25987000  |
| C  | -2.48373300 | 4.14816000  | -1.24732100 |
| C  | -2.28480600 | 4.24290400  | 1.15606000  |
| C  | -2.23263500 | 4.86781900  | -0.08454900 |
| H  | -2.44496900 | 4.64325700  | -2.21692700 |
| H  | -2.09093400 | 4.81225700  | 2.06441400  |
| H  | -1.99925100 | 5.92910800  | -0.14575300 |
| C  | -2.24022700 | -2.63253900 | 0.09238200  |
| C  | -1.94513600 | -3.17037100 | -1.16460500 |
| C  | -1.92079300 | -3.26957900 | 1.29605400  |
| C  | -1.31209500 | -4.41357100 | -1.19543000 |
| C  | -1.28442200 | -4.50766400 | 1.21588900  |
| C  | -0.98569300 | -5.07580400 | -0.01768900 |
| H  | -1.07817200 | -4.86389300 | -2.15955100 |
| H  | -1.02597800 | -5.03028700 | 2.13605600  |
| H  | -0.49627900 | -6.04691100 | -0.06118000 |
| C  | -2.23876700 | -2.63767800 | 2.61740600  |
| H  | -3.31943800 | -2.49831600 | 2.75852800  |
| H  | -1.87552400 | -3.25750100 | 3.44403300  |
| H  | -1.77548200 | -1.64468700 | 2.71127400  |
| C  | -2.26183600 | -2.43031900 | -2.42916400 |
| H  | -3.26625800 | -1.98602600 | -2.41376200 |
| H  | -1.55079100 | -1.60556600 | -2.59411500 |
| H  | -2.20126100 | -3.09578000 | -3.29715400 |
| C  | -2.62732700 | 2.19271700  | 2.58830600  |

|   |             |             |             |
|---|-------------|-------------|-------------|
| H | -3.57213500 | 1.65635000  | 2.74993500  |
| H | -1.82117000 | 1.44903400  | 2.67447900  |
| H | -2.50732700 | 2.91043700  | 3.40692300  |
| C | -3.04923600 | 1.99478400  | -2.43773800 |
| H | -2.28383100 | 1.21750400  | -2.58170000 |
| H | -4.02055300 | 1.48209500  | -2.40974600 |
| H | -3.03874000 | 2.64011700  | -3.32253000 |
| H | 4.37491300  | 2.55146200  | -0.97517800 |
| H | 4.31720900  | 0.75373600  | -1.42027700 |
| C | 2.22388200  | -2.15418100 | -1.12260900 |
| H | 1.39208700  | -2.65179700 | -0.60126600 |
| H | 1.86935900  | -1.89963200 | -2.12952700 |
| H | 3.06674700  | -2.84975300 | -1.18683300 |

### 6d-TS

Zero-point correction= 0.592823 (Hartree/Particle)

Thermal correction to Energy= 0.633311

Thermal correction to Enthalpy= 0.634255

Thermal correction to Gibbs Free Energy= 0.516156

Sum of electronic and zero-point Energies= -1725.749870

Sum of electronic and thermal Energies= -1725.709382

Sum of electronic and thermal Enthalpies= -1725.708438

Sum of electronic and thermal Free Energies= -1725.826537

M06/6-311++G(d,p)-SDD/SMD//M06/6-31G(d)-LANL2DZ energy in DCE solvent = -1727.16892638

Cartesian coordinates:

|    |             |             |             |
|----|-------------|-------------|-------------|
| C  | 2.09675900  | 0.36127200  | -0.10618000 |
| C  | 2.94648300  | -0.79349300 | -0.18544200 |
| Au | 0.01929600  | 0.10447600  | -0.12921900 |
| C  | -2.04010300 | 0.00664700  | -0.20142400 |
| N  | -2.86752800 | -1.05961200 | -0.22000300 |
| C  | -4.18135500 | 0.70436800  | -0.26814900 |
| C  | -4.19207900 | -0.65072100 | -0.26251100 |
| H  | -4.98214700 | 1.43192100  | -0.29525700 |
| H  | -5.00434800 | -1.36563500 | -0.28590500 |
| N  | -2.85035600 | 1.08801100  | -0.22983000 |
| N  | 2.82829000  | -1.87354700 | 0.54325900  |
| C  | 1.97514900  | -1.73988600 | 1.57468700  |
| C  | 2.78317900  | 0.50253900  | 2.58713400  |
| C  | 1.75492300  | -0.50676500 | 2.19574500  |
| C  | 1.17828300  | -2.95112700 | 1.91595400  |
| H  | 0.56132000  | -2.81632400 | 2.81019700  |
| H  | 0.52832600  | -3.22156300 | 1.06859500  |
| H  | 1.86117800  | -3.79673000 | 2.06737700  |
| O  | 3.97596500  | 0.31800200  | 2.46159300  |
| C  | 2.21491000  | 1.74537300  | 3.21899100  |
| H  | 2.99194500  | 2.51153900  | 3.29128600  |
| H  | 1.35531000  | 2.12587100  | 2.64698100  |
| H  | 1.85422900  | 1.51848800  | 4.23208600  |
| C  | 2.63694500  | 1.69373400  | -0.25637200 |
| C  | 3.95277100  | 1.91739900  | -0.00496300 |
| H  | 4.37235200  | 2.92057200  | -0.08201100 |
| H  | 4.63851000  | 1.13054500  | 0.30424400  |
| C  | 1.71247600  | 2.82090600  | -0.62511800 |
| H  | 1.20482600  | 2.61651500  | -1.57820600 |
| H  | 0.92257000  | 2.96155500  | 0.12848400  |
| H  | 2.25397400  | 3.76891500  | -0.72318800 |
| C  | -2.36546400 | 2.44103500  | -0.18728100 |
| C  | -2.07866800 | 3.00238600  | 1.06213300  |

|   |             |             |             |
|---|-------------|-------------|-------------|
| C | -2.17490400 | 3.11705400  | -1.39648000 |
| C | -1.58476600 | 4.30712200  | 1.07937700  |
| C | -1.68406300 | 4.42125400  | -1.32987300 |
| C | -1.39266700 | 5.01071000  | -0.10492000 |
| H | -1.36106100 | 4.77614700  | 2.03709900  |
| H | -1.53121100 | 4.97673700  | -2.25438300 |
| H | -1.01625200 | 6.03134900  | -0.07213000 |
| C | -2.43226200 | -2.42849800 | -0.15859900 |
| C | -2.06342200 | -3.06824300 | -1.34600400 |
| C | -2.40248600 | -3.05105200 | 1.09377600  |
| C | -1.65478900 | -4.39932100 | -1.25231100 |
| C | -1.99754000 | -4.38498700 | 1.13696300  |
| C | -1.62852500 | -5.05307700 | -0.02569400 |
| H | -1.36515000 | -4.92805500 | -2.15947500 |
| H | -1.96939400 | -4.89959900 | 2.09720400  |
| H | -1.31745600 | -6.09469300 | 0.02449600  |
| C | -2.76658100 | -2.30341300 | 2.34110000  |
| H | -3.81922400 | -1.98828900 | 2.34611000  |
| H | -2.60527700 | -2.92328700 | 3.23002600  |
| H | -2.16382400 | -1.38830600 | 2.45054200  |
| C | -2.10227300 | -2.35285700 | -2.66268800 |
| H | -3.06765200 | -1.85674200 | -2.83279600 |
| H | -1.32836000 | -1.57326800 | -2.72094600 |
| H | -1.93310300 | -3.04978600 | -3.49032900 |
| C | -2.27007600 | 2.22680200  | 2.33120300  |
| H | -3.24713800 | 1.72630100  | 2.37099100  |
| H | -1.50736600 | 1.43873800  | 2.43631000  |
| H | -2.19263000 | 2.88226700  | 3.20552500  |
| C | -2.45901200 | 2.45359000  | -2.70994200 |
| H | -1.83437200 | 1.55823300  | -2.84990100 |
| H | -3.50438400 | 2.12629100  | -2.79159800 |
| H | -2.25896100 | 3.13473800  | -3.54375700 |
| H | 0.84271100  | -0.44308800 | 2.79964400  |
| C | 4.00137600  | -0.84939200 | -1.27157600 |
| O | 5.16994400  | -1.01179900 | -1.04425600 |
| O | 3.44520400  | -0.69026000 | -2.46962200 |
| C | 4.36175500  | -0.74621300 | -3.57350000 |
| H | 3.75385200  | -0.61690100 | -4.46920300 |
| H | 5.10347400  | 0.05398100  | -3.48615300 |
| H | 4.87477200  | -1.71245000 | -3.58757000 |

#### 7d-TS

Zero-point correction= 0.594141 (Hartree/Particle)

Thermal correction to Energy= 0.634447

Thermal correction to Enthalpy= 0.635391

Thermal correction to Gibbs Free Energy= 0.517581

Sum of electronic and zero-point Energies= -1725.749656

Sum of electronic and thermal Energies= -1725.709351

Sum of electronic and thermal Enthalpies= -1725.708406

Sum of electronic and thermal Free Energies= -1725.826217

M06/6-311++G(d,p)-SDD/SMD//M06/6-31G(d)-LANL2DZ energy in DCE solvent = -1727.16468421

Cartesian coordinates:

|   |             |             |             |
|---|-------------|-------------|-------------|
| C | -4.98869800 | -1.47522700 | 0.88950200  |
| C | -6.02101400 | -0.93736500 | -0.05129400 |
| C | -3.97291300 | -0.68788300 | 1.41565600  |
| O | -5.78257800 | -0.02828700 | -0.82249300 |
| H | -5.30549700 | -2.31211100 | 1.51559700  |
| C | -3.29407500 | -1.02738600 | 2.69869900  |

|    |             |             |             |
|----|-------------|-------------|-------------|
| H  | -3.25373600 | -0.14822400 | 3.35248200  |
| H  | -3.78291100 | -1.85242700 | 3.22372900  |
| H  | -2.24905900 | -1.30309900 | 2.47398500  |
| C  | -7.36521900 | -1.59991800 | 0.03874500  |
| H  | -8.02985600 | -1.19929000 | -0.73078600 |
| H  | -7.27071900 | -2.68838400 | -0.07895800 |
| H  | -7.81009500 | -1.42788400 | 1.02848100  |
| C  | -1.67193700 | -0.63723800 | -0.31839200 |
| C  | -2.56616500 | 0.48506600  | -0.08626000 |
| Au | 0.32768100  | -0.21700300 | -0.02221400 |
| N  | -3.50364100 | 0.39718600  | 0.78870000  |
| C  | 4.35391900  | 1.19368200  | 0.07496200  |
| C  | 4.58449600  | -0.14054300 | -0.00435500 |
| H  | 5.02746600  | 2.04042300  | 0.09661700  |
| H  | 5.50235200  | -0.71084300 | -0.06455000 |
| N  | 2.97891700  | 1.35701300  | 0.12442700  |
| N  | 3.34331300  | -0.75626900 | -0.00108100 |
| C  | 2.35480600  | 0.16086800  | 0.07720400  |
| C  | -2.16708300 | -1.91838500 | -0.51598000 |
| C  | -3.52889800 | -2.07867700 | -0.83310500 |
| C  | 3.09801300  | -2.16934600 | -0.10559600 |
| C  | 2.90188900  | -2.71372700 | -1.37916000 |
| C  | 3.02769700  | -2.92064900 | 1.07152300  |
| C  | 2.63355000  | -4.08078200 | -1.45569900 |
| C  | 2.75578700  | -4.28294500 | 0.94610200  |
| C  | 2.56133600  | -4.85748500 | -0.30484000 |
| H  | 2.48580700  | -4.53647600 | -2.43424400 |
| H  | 2.70220900  | -4.89650400 | 1.84476100  |
| H  | 2.35804100  | -5.92380900 | -0.38427100 |
| C  | 2.28348700  | 2.61476800  | 0.18370400  |
| C  | 1.75284400  | 3.13964200  | -0.99808700 |
| C  | 2.14532200  | 3.23281300  | 1.43244000  |
| C  | 1.06581800  | 4.35135200  | -0.90373800 |
| C  | 1.45494800  | 4.44205700  | 1.47642100  |
| C  | 0.92281100  | 4.99809800  | 0.31724800  |
| H  | 0.64503700  | 4.78647600  | -1.81035900 |
| H  | 1.33607500  | 4.95003200  | 2.43270600  |
| H  | 0.39508000  | 5.94948100  | 0.36809900  |
| C  | 2.70209600  | 2.60563800  | 2.67480000  |
| H  | 3.79930900  | 2.55034300  | 2.65614000  |
| H  | 2.41726400  | 3.18000300  | 3.56276200  |
| H  | 2.33405900  | 1.57740500  | 2.80529400  |
| C  | 1.87039000  | 2.42801200  | -2.31113600 |
| H  | 2.82229500  | 1.89070000  | -2.41574900 |
| H  | 1.05598900  | 1.69604600  | -2.42505300 |
| H  | 1.78682100  | 3.13506800  | -3.14406700 |
| C  | 3.21659500  | -2.28151800 | 2.41391600  |
| H  | 4.17251700  | -1.74525600 | 2.48603900  |
| H  | 2.42438000  | -1.54757100 | 2.62276700  |
| H  | 3.19541500  | -3.03253200 | 3.21087900  |
| C  | 2.95119200  | -1.85793200 | -2.60885100 |
| H  | 2.10613600  | -1.15312200 | -2.64053800 |
| H  | 3.86809600  | -1.25486000 | -2.65806400 |
| H  | 2.90599500  | -2.47197800 | -3.51467500 |
| H  | -4.06785300 | -1.25890000 | -1.30086600 |
| H  | -3.94226800 | -3.07759100 | -0.97808100 |
| C  | -1.27649800 | -3.12313800 | -0.36284700 |
| H  | -0.44910100 | -3.08721700 | -1.08551500 |
| H  | -0.81706300 | -3.16050600 | 0.63480000  |

|   |             |             |             |
|---|-------------|-------------|-------------|
| H | -1.82165400 | -4.05987100 | -0.52783500 |
| C | -2.26643300 | 1.81961600  | -0.72917400 |
| O | -1.45295300 | 1.93052500  | -1.61732100 |
| O | -3.01224300 | 2.78755600  | -0.23171600 |
| C | -2.82241400 | 4.07678400  | -0.82446900 |
| H | -3.02660100 | 4.03096200  | -1.89887500 |
| H | -3.53064800 | 4.73811200  | -0.32447700 |
| H | -1.79193700 | 4.41324700  | -0.66296300 |

### 6g-TS

Zero-point correction= 0.804065 (Hartree/Particle)  
 Thermal correction to Energy= 0.854967  
 Thermal correction to Enthalpy= 0.855911  
 Thermal correction to Gibbs Free Energy= 0.719008  
 Sum of electronic and zero-point Energies= -2415.845401  
 Sum of electronic and thermal Energies= -2415.794499  
 Sum of electronic and thermal Enthalpies= -2415.793555  
 Sum of electronic and thermal Free Energies= -2415.930458  
 M06/6-311++G(d,p)-SDD/SMD//M06/6-31G(d)-LANL2DZ energy in DCE solvent = -2417.58324421

Cartesian coordinates:

|    |             |             |             |
|----|-------------|-------------|-------------|
| C  | 1.41395300  | 0.25290400  | 0.10720000  |
| C  | 1.73658900  | -1.11720200 | -0.15520700 |
| N  | 2.07118700  | -1.47531800 | -1.43840400 |
| S  | 1.95538600  | -3.17247700 | -1.91751700 |
| O  | 0.66409000  | -3.69871900 | -1.51812000 |
| O  | 2.33937600  | -3.14999200 | -3.31687300 |
| Au | -0.69866100 | 0.33679000  | 0.08614900  |
| C  | -2.72495700 | 0.42306800  | -0.21467700 |
| N  | -3.63046000 | -0.57439200 | -0.13615900 |
| C  | -4.75387900 | 1.19378900  | -0.81193600 |
| C  | -4.88873900 | -0.11885100 | -0.50236600 |
| H  | -5.47068700 | 1.93325700  | -1.14433700 |
| H  | -5.74912200 | -0.77513400 | -0.50825300 |
| N  | -3.41602500 | 1.50670700  | -0.62786200 |
| N  | 1.56233600  | -2.11386300 | 0.72277100  |
| C  | 0.90475400  | -1.85909000 | 1.84835300  |
| C  | 1.66331500  | 0.37727800  | 2.87149600  |
| C  | 0.65610000  | -0.57174600 | 2.38893800  |
| O  | 2.87144900  | 0.20851100  | 2.77832500  |
| C  | 1.09516800  | 1.58280900  | 3.58386500  |
| H  | 1.87471800  | 2.33964100  | 3.71480000  |
| H  | 0.24059000  | 2.00916100  | 3.04009400  |
| H  | 0.73364600  | 1.29242800  | 4.58009900  |
| C  | 1.90484100  | -0.50933700 | -2.52406800 |
| H  | 0.87647300  | -0.11009600 | -2.52517200 |
| H  | 2.60172000  | 0.32637000  | -2.40394500 |
| H  | 2.11071100  | -1.01083100 | -3.47176900 |
| C  | 2.26144400  | 1.37766700  | 0.11325200  |
| C  | 3.66878400  | 1.31288700  | 0.13410700  |
| C  | 1.56796100  | 2.72939100  | 0.12666300  |
| H  | 1.59321600  | 3.21324100  | -0.86117800 |
| H  | 0.50740700  | 2.61567900  | 0.38361000  |
| H  | 2.00063900  | 3.43095900  | 0.84977400  |
| C  | -2.80005900 | 2.78644700  | -0.84502800 |
| C  | -2.64306100 | 3.64125500  | 0.25043700  |
| C  | -2.34208200 | 3.09027800  | -2.13115900 |
| C  | -2.00757200 | 4.86224000  | 0.02316300  |
| C  | -1.71248100 | 4.32164800  | -2.31108700 |

|   |             |             |             |
|---|-------------|-------------|-------------|
| C | -1.54886400 | 5.19960500  | -1.24520900 |
| H | -1.87906000 | 5.55500500  | 0.85414600  |
| H | -1.35148100 | 4.59144800  | -3.30296800 |
| H | -1.06219600 | 6.15982100  | -1.40588100 |
| C | -3.32338200 | -1.91026100 | 0.29903100  |
| C | -2.69219900 | -2.78396500 | -0.59276400 |
| C | -3.67113900 | -2.26458800 | 1.60836600  |
| C | -2.42274800 | -4.07633700 | -0.13708000 |
| C | -3.40249700 | -3.57232300 | 2.01106600  |
| C | -2.78833300 | -4.47056700 | 1.14355500  |
| H | -1.92117600 | -4.77378600 | -0.80628900 |
| H | -3.67647000 | -3.88316600 | 3.01897200  |
| H | -2.58478500 | -5.48748000 | 1.47445100  |
| C | 3.27095700  | -3.93160100 | -0.99763400 |
| H | 4.20566500  | -3.44078700 | -1.28461500 |
| H | 3.06210900  | -3.83958300 | 0.06955800  |
| H | 3.28530200  | -4.98044700 | -1.31295800 |
| C | -4.29278300 | -1.27127900 | 2.54437100  |
| H | -5.31936600 | -1.00860700 | 2.25335400  |
| H | -4.33602900 | -1.67079100 | 3.56340400  |
| H | -3.72112500 | -0.33106100 | 2.57197800  |
| C | -2.30721400 | -2.35999900 | -1.97801300 |
| H | -3.07738400 | -1.73424600 | -2.44956300 |
| H | -1.37238000 | -1.77673200 | -1.96520000 |
| H | -2.12665200 | -3.23124000 | -2.61599800 |
| C | -3.11347200 | 3.24847800  | 1.61879200  |
| H | -4.15331800 | 2.89417800  | 1.61442700  |
| H | -2.50253200 | 2.43037900  | 2.03207200  |
| H | -3.05011100 | 4.09401200  | 2.31224600  |
| C | -2.50797000 | 2.12022300  | -3.26174600 |
| H | -2.03687700 | 1.15166200  | -3.03419200 |
| H | -3.56574000 | 1.91401700  | -3.47611900 |
| H | -2.05496800 | 2.50846100  | -4.18025500 |
| C | 4.40169900  | 2.63322700  | 0.04391100  |
| H | 3.71093700  | 3.34402700  | -0.42619100 |
| C | 4.45518700  | 0.03194400  | 0.29080200  |
| H | 3.75680600  | -0.74004000 | 0.63499400  |
| H | -0.28506200 | -0.50064600 | 2.94956400  |
| C | 0.24406100  | -3.04005000 | 2.48341800  |
| H | -0.84670000 | -2.88258200 | 2.48125400  |
| H | 0.45287600  | -3.95171600 | 1.91546500  |
| H | 0.55073400  | -3.16547200 | 3.52963200  |
| C | 4.69450700  | 3.18557200  | 1.45435500  |
| H | 5.56116800  | 2.69058000  | 1.90401200  |
| H | 4.91840200  | 4.25706300  | 1.38027600  |
| H | 3.84895700  | 3.05238400  | 2.14071700  |
| C | 5.66272800  | 2.67498100  | -0.81781600 |
| H | 6.00243800  | 3.71705700  | -0.87532300 |
| H | 6.49295300  | 2.09107500  | -0.40661400 |
| H | 5.47246500  | 2.33661600  | -1.84391900 |
| C | 5.53361100  | 0.09517700  | 1.38105400  |
| H | 5.92422900  | -0.92051100 | 1.52511100  |
| H | 6.38538600  | 0.72749300  | 1.10518400  |
| H | 5.11956100  | 0.42841300  | 2.33582800  |
| C | 5.10501900  | -0.47358900 | -1.01002200 |
| H | 4.41035800  | -0.56099100 | -1.85243900 |
| H | 5.94270300  | 0.15701800  | -1.32355900 |
| H | 5.51703700  | -1.47315000 | -0.81513900 |



**7g-TS**

Zero-point correction= 0.805855 (Hartree/Particle)  
Thermal correction to Energy= 0.855664  
Thermal correction to Enthalpy= 0.856608  
Thermal correction to Gibbs Free Energy= 0.724240  
Sum of electronic and zero-point Energies= -2415.831282  
Sum of electronic and thermal Energies= -2415.781473  
Sum of electronic and thermal Enthalpies= -2415.780529  
Sum of electronic and thermal Free Energies= -2415.912897  
M06/6-311++G(d,p)-SDD/SMD//M06/6-31G(d)-LANL2DZ energy in DCE solvent = -2417.57036125

Cartesian coordinates:

|    |             |             |             |
|----|-------------|-------------|-------------|
| C  | 4.13670800  | -0.52046100 | -1.24834300 |
| C  | 4.98225100  | 0.61383300  | -0.81568400 |
| C  | 2.84639400  | -0.29552400 | -1.72646600 |
| O  | 4.55133400  | 1.61971400  | -0.27256900 |
| H  | 4.68059600  | -1.33870700 | -1.72447700 |
| C  | 2.22268300  | -1.14364700 | -2.78679700 |
| H  | 1.91286000  | -0.50278200 | -3.62192300 |
| H  | 2.89125000  | -1.92464400 | -3.16142100 |
| H  | 1.30211500  | -1.60362600 | -2.39274200 |
| C  | 6.43831700  | 0.50189500  | -1.19793100 |
| H  | 7.03373500  | 1.21902000  | -0.62486600 |
| H  | 6.83489500  | -0.51233600 | -1.06185300 |
| H  | 6.54565300  | 0.74242600  | -2.26526600 |
| C  | 1.16228500  | -0.20162700 | 0.63504700  |
| C  | 1.63941700  | 0.95720100  | -0.13346100 |
| Au | -0.92523600 | -0.28039100 | 0.33998100  |
| N  | 2.12848900  | 0.74566700  | -1.31389400 |
| C  | -5.11115400 | 0.16236100  | -0.33792100 |
| C  | -4.99439400 | -1.16888800 | -0.56947800 |
| H  | -5.96355000 | 0.82795800  | -0.37738200 |
| H  | -5.72230600 | -1.91771500 | -0.85348100 |
| N  | -3.84571000 | 0.62075000  | -0.00928100 |
| N  | -3.65861300 | -1.48708500 | -0.37621400 |
| C  | -2.95053200 | -0.38852000 | -0.03523700 |
| C  | 1.87455700  | -1.29178200 | 1.04928100  |
| N  | 1.29551700  | 2.22618200  | 0.25526500  |
| C  | 0.58051600  | 2.49140300  | 1.50831400  |
| H  | -0.50152200 | 2.59993200  | 1.34556000  |
| H  | 0.75792800  | 1.65646100  | 2.18961500  |
| H  | 0.96837800  | 3.41118000  | 1.95304200  |
| S  | 1.13514800  | 3.49347600  | -0.93246000 |
| O  | 0.27826300  | 3.01432700  | -2.00299900 |
| O  | 0.75430500  | 4.65251200  | -0.14541800 |
| C  | 3.33606300  | -1.44795600 | 1.06912700  |
| C  | 1.10363500  | -2.47265400 | 1.62408400  |
| H  | 0.07917700  | -2.15368500 | 1.84511500  |
| H  | 1.03534500  | -3.33925500 | 0.95396500  |
| H  | 1.54737100  | -2.81932000 | 2.57029800  |
| C  | -3.05578400 | -2.77899900 | -0.55413200 |
| C  | -3.01364500 | -3.65204200 | 0.53708300  |
| C  | -2.49307100 | -3.07707400 | -1.79948400 |
| C  | -2.38343900 | -4.88214400 | 0.34959500  |
| C  | -1.87125500 | -4.31755700 | -1.94049200 |
| C  | -1.81812300 | -5.21191700 | -0.87707800 |
| H  | -2.34279500 | -5.58755700 | 1.17894100  |
| H  | -1.43297500 | -4.58325400 | -2.90211600 |
| H  | -1.33819700 | -6.18015300 | -1.00824500 |
| C  | -3.47101400 | 1.98189600  | 0.26782300  |

|   |             |             |             |
|---|-------------|-------------|-------------|
| C | -3.59992300 | 2.45583600  | 1.57715800  |
| C | -2.93009500 | 2.73683800  | -0.77824700 |
| C | -3.15993400 | 3.75498900  | 1.83098400  |
| C | -2.49652000 | 4.02765100  | -0.47475000 |
| C | -2.60707500 | 4.52972800  | 0.81648000  |
| H | -3.24655300 | 4.15485700  | 2.84086100  |
| H | -2.04551200 | 4.63157900  | -1.26039500 |
| H | -2.24769600 | 5.53366100  | 1.03391800  |
| C | 2.78288700  | 3.75109500  | -1.54077300 |
| H | 3.05781300  | 2.92679900  | -2.19987400 |
| H | 2.73851800  | 4.70107700  | -2.08423900 |
| H | 3.47023100  | 3.81292000  | -0.69362700 |
| C | -2.78034000 | 2.16529100  | -2.15516900 |
| H | -3.69798300 | 1.66743000  | -2.49869600 |
| H | -2.51988100 | 2.94758800  | -2.87505300 |
| H | -1.96935800 | 1.42166700  | -2.18316300 |
| C | -4.16046600 | 1.59160200  | 2.66611000  |
| H | -5.19977300 | 1.29577800  | 2.46699100  |
| H | -3.58210600 | 0.66282400  | 2.78100500  |
| H | -4.14576700 | 2.11651200  | 3.62736200  |
| C | -2.53249100 | -2.09102600 | -2.92787900 |
| H | -3.54206100 | -1.69243200 | -3.09656200 |
| H | -1.88228500 | -1.22613000 | -2.72539000 |
| H | -2.19409200 | -2.55217000 | -3.86224400 |
| C | -3.60316000 | -3.26859600 | 1.86046900  |
| H | -3.10155000 | -2.38457300 | 2.28159600  |
| H | -4.66960000 | -3.01786800 | 1.78052100  |
| H | -3.50681100 | -4.08546100 | 2.58374600  |
| C | 4.09917900  | -0.62128900 | 2.08598600  |
| H | 4.04544000  | -1.39833800 | 2.88759800  |
| C | 3.81796300  | -2.86616300 | 0.79719700  |
| H | 3.35152300  | -3.40427700 | 1.64582800  |
| C | 3.39756200  | 0.60647900  | 2.65383200  |
| H | 3.33463400  | 1.40240900  | 1.90134500  |
| H | 2.39750600  | 0.38359900  | 3.04124800  |
| H | 3.99929400  | 0.99277600  | 3.48570500  |
| C | 5.59076600  | -0.29058200 | 1.92064800  |
| H | 5.70614700  | 0.76511700  | 1.65729100  |
| H | 6.10657200  | -0.44648600 | 2.87596000  |
| H | 6.10864700  | -0.88454700 | 1.16761400  |
| C | 5.30516600  | -3.18467900 | 0.89654100  |
| H | 5.74841600  | -2.92558100 | 1.86374900  |
| H | 5.42929300  | -4.26688300 | 0.76477300  |
| H | 5.88543600  | -2.69998900 | 0.10047300  |
| C | 3.26428700  | -3.50992700 | -0.47732100 |
| H | 3.22686100  | -4.59917300 | -0.35387800 |
| H | 2.26073900  | -3.16585800 | -0.74840800 |
| H | 3.92893000  | -3.30679500 | -1.32590000 |

## 6i-TS

|                                              |                             |
|----------------------------------------------|-----------------------------|
| Zero-point correction=                       | 0.716391 (Hartree/Particle) |
| Thermal correction to Energy=                | 0.763544                    |
| Thermal correction to Enthalpy=              | 0.764488                    |
| Thermal correction to Gibbs Free Energy=     | 0.633874                    |
| Sum of electronic and zero-point Energies=   | -2411.136539                |
| Sum of electronic and thermal Energies=      | -2411.089387                |
| Sum of electronic and thermal Enthalpies=    | -2411.088443                |
| Sum of electronic and thermal Free Energies= | -2411.219057                |

M06/6-311++G(d,p)-SDD/SMD//M06/6-31G(d)-LANL2DZ energy in DCE solvent = -2412.78025121

Cartesian coordinates:

|    |             |             |             |
|----|-------------|-------------|-------------|
| C  | 1.23717700  | -0.08812500 | 0.36049700  |
| C  | 1.33409900  | -1.50828100 | -0.04479600 |
| N  | 1.72536900  | -1.81667800 | -1.31793100 |
| S  | 1.62645200  | -3.48710200 | -1.88386300 |
| O  | 0.26542100  | -3.96234600 | -1.73714200 |
| O  | 2.24746300  | -3.43192000 | -3.19400300 |
| Au | -0.78248800 | 0.42518900  | 0.26632100  |
| C  | -2.75792100 | 0.82314900  | -0.16101400 |
| N  | -3.76072900 | -0.06938200 | -0.31155500 |
| C  | -4.59814600 | 1.87152600  | -0.92380000 |
| C  | -4.90412400 | 0.55839800  | -0.78064500 |
| H  | -5.18515100 | 2.71587600  | -1.26111500 |
| H  | -5.81699800 | 0.00786100  | -0.96673100 |
| N  | -3.27497900 | 2.01225800  | -0.53737300 |
| N  | 0.86984500  | -2.46902900 | 0.72778100  |
| C  | 0.57513700  | -2.06661900 | 1.97723300  |
| C  | 2.79903100  | -1.01663200 | 2.58466200  |
| C  | 1.32805300  | -1.09796700 | 2.63556000  |
| O  | 3.50167500  | -1.74256800 | 1.89364300  |
| C  | 3.39929400  | 0.03034000  | 3.48422800  |
| H  | 4.47217900  | 0.12148900  | 3.29074100  |
| H  | 2.90436400  | 1.00069100  | 3.33206700  |
| H  | 3.24896000  | -0.23955900 | 4.53863100  |
| C  | 1.86799000  | -0.80045000 | -2.36117800 |
| H  | 1.09268100  | -0.03150000 | -2.24091300 |
| H  | 2.85480300  | -0.32338400 | -2.32479800 |
| H  | 1.75469900  | -1.28162700 | -3.33479300 |
| C  | 2.28475600  | 0.86441600  | 0.29631700  |
| C  | 3.56950100  | 0.42471300  | 0.03354300  |
| C  | 1.94394900  | 2.29711500  | 0.60984600  |
| H  | 1.62121500  | 2.85022100  | -0.28594800 |
| H  | 1.10673400  | 2.33817700  | 1.31949500  |
| H  | 2.78986700  | 2.83545900  | 1.05400100  |
| C  | -2.50601500 | 3.22671900  | -0.57039800 |
| C  | -2.45693800 | 4.01533700  | 0.58280900  |
| C  | -1.80986800 | 3.53400200  | -1.74426300 |
| C  | -1.67582900 | 5.16994400  | 0.53469300  |
| C  | -1.04218600 | 4.69844800  | -1.74618000 |
| C  | -0.97678800 | 5.50870300  | -0.61800200 |
| H  | -1.62304300 | 5.80977800  | 1.41479500  |
| H  | -0.49672000 | 4.97123000  | -2.64907500 |
| H  | -0.37911400 | 6.41810500  | -0.63948700 |
| C  | -3.64974100 | -1.47235800 | -0.00664000 |
| C  | -2.98607000 | -2.31513600 | -0.90559600 |
| C  | -4.20707000 | -1.92162700 | 1.19775700  |
| C  | -2.89683000 | -3.66773100 | -0.56854200 |
| C  | -4.11005400 | -3.28281600 | 1.48176000  |
| C  | -3.46310100 | -4.14777800 | 0.60481900  |
| H  | -2.36462600 | -4.33980300 | -1.24001700 |
| H  | -4.54250100 | -3.66199100 | 2.40720200  |
| H  | -3.39462100 | -5.20767000 | 0.84309100  |
| C  | 2.73200500  | -4.31893700 | -0.76953200 |
| H  | 3.72855600  | -3.88927300 | -0.90519900 |
| H  | 2.37898900  | -4.19968600 | 0.25645500  |
| H  | 2.72494900  | -5.37109000 | -1.07278900 |
| C  | -4.85174900 | -0.96942600 | 2.16028100  |
| H  | -5.77538900 | -0.52893900 | 1.76036800  |

|   |             |             |             |
|---|-------------|-------------|-------------|
| H | -5.11050400 | -1.47765100 | 3.09537000  |
| H | -4.18101900 | -0.13195500 | 2.40580000  |
| C | -2.36618300 | -1.80815300 | -2.17315400 |
| H | -2.95790700 | -1.00845000 | -2.63880200 |
| H | -1.35865600 | -1.40247100 | -1.98178000 |
| H | -2.24643100 | -2.62049900 | -2.89780500 |
| C | -3.19716500 | 3.62287300  | 1.82546600  |
| H | -4.26254500 | 3.43883600  | 1.63121700  |
| H | -2.78874500 | 2.69816500  | 2.25915500  |
| H | -3.12687300 | 4.40718000  | 2.58667300  |
| C | -1.87141000 | 2.63522300  | -2.94246400 |
| H | -1.44010600 | 1.64560200  | -2.72467800 |
| H | -2.90302700 | 2.46101500  | -3.27783900 |
| H | -1.31686800 | 3.06527800  | -3.78345500 |
| H | 0.87484600  | -0.64053200 | 3.51934400  |
| C | -0.65755100 | -2.65114800 | 2.57427600  |
| H | -1.54385200 | -2.21622400 | 2.08319400  |
| H | -0.69311600 | -3.72622300 | 2.36021800  |
| H | -0.72812900 | -2.48159700 | 3.65280800  |
| H | 3.69115300  | -0.65443700 | -0.06351900 |
| C | 4.80985200  | 1.14980200  | -0.06535500 |
| C | 5.98629300  | 0.41758800  | 0.19737400  |
| C | 4.92389400  | 2.50785200  | -0.42163700 |
| C | 7.22681900  | 1.03083500  | 0.15422700  |
| H | 5.89628000  | -0.63381700 | 0.47227600  |
| C | 6.17070300  | 3.10770600  | -0.49373600 |
| H | 4.03855800  | 3.07864400  | -0.69051200 |
| C | 7.32041500  | 2.37730700  | -0.19414700 |
| H | 8.12489700  | 0.46037400  | 0.38027100  |
| H | 6.25187100  | 4.15144700  | -0.78947800 |
| H | 8.29529600  | 2.85828000  | -0.24406000 |

### 7i-TS

Zero-point correction= 0.716466 (Hartree/Particle)

Thermal correction to Energy= 0.763704

Thermal correction to Enthalpy= 0.764648

Thermal correction to Gibbs Free Energy= 0.634215

Sum of electronic and zero-point Energies= -2411.141577

Sum of electronic and thermal Energies= -2411.094339

Sum of electronic and thermal Enthalpies= -2411.093395

Sum of electronic and thermal Free Energies= -2411.223828

M06/6-311++G(d,p)-SDD/SMD//M06/6-31G(d)-LANL2DZ energy in DCE solvent = -2412.78261763

Cartesian coordinates:

|   |             |             |             |
|---|-------------|-------------|-------------|
| C | -3.84543500 | -0.00950200 | 1.51848800  |
| C | -4.84716800 | 1.03453800  | 1.16133700  |
| C | -2.53141400 | 0.29979200  | 1.89221000  |
| O | -4.54561000 | 2.10309200  | 0.65738000  |
| H | -4.27240800 | -0.89437500 | 1.99992000  |
| C | -1.78976500 | -0.53710700 | 2.87867300  |
| H | -1.10397200 | 0.08577900  | 3.46446700  |
| H | -2.44523100 | -1.10714200 | 3.54402300  |
| H | -1.16169400 | -1.24442600 | 2.30555400  |
| C | -6.27026500 | 0.66637400  | 1.47438700  |
| H | -6.95126100 | 1.40297400  | 1.03907100  |
| H | -6.50840800 | -0.33811000 | 1.09600200  |
| H | -6.41776300 | 0.63967400  | 2.56322800  |
| C | -1.07535600 | 0.03780500  | -0.51694300 |
| C | -1.37433700 | 1.33278400  | 0.10901600  |

|    |             |             |             |
|----|-------------|-------------|-------------|
| Au | 0.94961300  | -0.38448500 | -0.33282100 |
| N  | -1.85269900 | 1.28317200  | 1.31579300  |
| C  | 5.15364700  | -0.42266200 | 0.32593200  |
| C  | 4.89463900  | -1.72950100 | 0.58216300  |
| H  | 6.07173500  | 0.14897900  | 0.36213500  |
| H  | 5.53730700  | -2.54478200 | 0.88797700  |
| N  | 3.94720600  | 0.15882400  | -0.02715600 |
| N  | 3.53524600  | -1.91017200 | 0.37709100  |
| C  | 2.95177200  | -0.75171200 | 0.00361400  |
| C  | -2.07475300 | -0.87490300 | -0.76195300 |
| N  | -0.96303800 | 2.50591500  | -0.45247900 |
| C  | -0.31481900 | 2.52338100  | -1.76850500 |
| H  | 0.77628200  | 2.41736300  | -1.68480700 |
| H  | -0.71839200 | 1.69775000  | -2.36123600 |
| H  | -0.54409900 | 3.46939100  | -2.26343800 |
| S  | -0.70031300 | 3.91600800  | 0.54517300  |
| O  | 0.02541800  | 3.50584100  | 1.73330100  |
| O  | -0.13911400 | 4.89267700  | -0.36908600 |
| C  | -3.43454700 | -0.42290800 | -0.67558100 |
| C  | -1.73847300 | -2.30782900 | -1.06966200 |
| H  | -0.71708300 | -2.38006900 | -1.46248700 |
| H  | -1.77007200 | -2.93076200 | -0.16167800 |
| H  | -2.42409900 | -2.75260500 | -1.80097500 |
| C  | 2.79710300  | -3.12951600 | 0.55918600  |
| C  | 2.60952100  | -3.96567400 | -0.54516900 |
| C  | 2.25346300  | -3.38887000 | 1.82163900  |
| C  | 1.85268200  | -5.12155400 | -0.35160500 |
| C  | 1.50177400  | -4.55430100 | 1.96790000  |
| C  | 1.30510000  | -5.41339300 | 0.89215100  |
| H  | 1.69709600  | -5.79846600 | -1.19095700 |
| H  | 1.07392400  | -4.78949400 | 2.94203800  |
| H  | 0.72366000  | -6.32374200 | 1.02650100  |
| C  | 3.72203400  | 1.53725600  | -0.37254300 |
| C  | 3.97513200  | 1.93464900  | -1.69078500 |
| C  | 3.19050100  | 2.38998500  | 0.60091200  |
| C  | 3.68072700  | 3.25481400  | -2.02910400 |
| C  | 2.91156400  | 3.70207100  | 0.21468700  |
| C  | 3.14872600  | 4.12857700  | -1.08607100 |
| H  | 3.86527600  | 3.59344600  | -3.04814100 |
| H  | 2.48336500  | 4.38597600  | 0.94572900  |
| H  | 2.90295700  | 5.15087400  | -1.36712700 |
| C  | -2.35142500 | 4.40221500  | 0.97095000  |
| H  | -2.85759100 | 3.58144000  | 1.48412700  |
| H  | -2.25230600 | 5.27947300  | 1.61875700  |
| H  | -2.88008900 | 4.66031700  | 0.04920700  |
| C  | 2.87801300  | 1.91969400  | 1.98994800  |
| H  | 3.58858200  | 1.16267100  | 2.34771800  |
| H  | 2.88297800  | 2.76016400  | 2.69245700  |
| H  | 1.86793300  | 1.47991900  | 2.03498800  |
| C  | 4.51181400  | 0.96888300  | -2.70422000 |
| H  | 5.52879000  | 0.63252400  | -2.45906000 |
| H  | 3.88630600  | 0.06631700  | -2.77317900 |
| H  | 4.54929400  | 1.42787700  | -3.69800000 |
| C  | 2.45231300  | -2.43680900 | 2.96234500  |
| H  | 3.51546200  | -2.24492700 | 3.16170100  |
| H  | 1.98971900  | -1.45979400 | 2.75405000  |
| H  | 2.00753700  | -2.83064700 | 3.88279900  |
| C  | 3.17187300  | -3.61756100 | -1.89013000 |
| H  | 2.65201400  | -2.75104200 | -2.32614900 |

|   |             |             |             |
|---|-------------|-------------|-------------|
| H | 4.23728000  | -3.35571200 | -1.84037400 |
| H | 3.06401500  | -4.45475600 | -2.58811200 |
| H | -3.54781600 | 0.65569200  | -0.79788200 |
| C | -4.63604200 | -1.17153800 | -1.02225400 |
| C | -5.65238900 | -0.48638100 | -1.70849000 |
| C | -4.84617400 | -2.51265200 | -0.66215800 |
| C | -6.82784200 | -1.13435300 | -2.06253500 |
| H | -5.50756300 | 0.56347500  | -1.96557100 |
| C | -6.03211400 | -3.14908700 | -0.99497500 |
| H | -4.09021000 | -3.04411700 | -0.08645700 |
| C | -7.02022500 | -2.46543700 | -1.70356300 |
| H | -7.59989600 | -0.59731300 | -2.60917600 |
| H | -6.19140000 | -4.18427500 | -0.70056500 |
| H | -7.94627100 | -2.97176900 | -1.96821300 |

### 6k-TS

Zero-point correction= 0.632158 (Hartree/Particle)  
 Thermal correction to Energy= 0.672296  
 Thermal correction to Enthalpy= 0.673240  
 Thermal correction to Gibbs Free Energy= 0.557276  
 Sum of electronic and zero-point Energies= -1728.843436  
 Sum of electronic and thermal Energies= -1728.803298  
 Sum of electronic and thermal Enthalpies= -1728.802354  
 Sum of electronic and thermal Free Energies= -1728.918318  
 M06/6-311++G(d,p)-SDD/SMD//M06/6-31G(d)-LANL2DZ energy in DCE solvent = -1730.29526614

Cartesian coordinates:

|    |             |             |             |
|----|-------------|-------------|-------------|
| C  | 1.35228400  | -1.03975100 | -0.57469700 |
| C  | 1.28930000  | -2.29539700 | -1.27351200 |
| Au | -0.49555200 | -0.06020600 | -0.28392000 |
| C  | -2.22858500 | 1.01310800  | 0.01310900  |
| N  | -3.51829000 | 0.61356400  | 0.01444400  |
| C  | -3.57229900 | 2.76772700  | 0.45683100  |
| C  | -4.36244100 | 1.68070600  | 0.28507100  |
| H  | -3.80471400 | 3.80027400  | 0.68285800  |
| H  | -5.43668600 | 1.55520700  | 0.32619700  |
| N  | -2.26642900 | 2.33650600  | 0.28656600  |
| N  | 0.58982400  | -3.33197400 | -0.88136500 |
| C  | 0.11470700  | -3.16293900 | 0.36617600  |
| C  | 2.23965700  | -2.36853400 | 1.59746300  |
| C  | 0.78219100  | -2.32097200 | 1.26857300  |
| C  | -1.21610400 | -3.75856700 | 0.65798600  |
| H  | -1.53995300 | -3.59037700 | 1.69043700  |
| H  | -1.97144800 | -3.34667500 | -0.02912400 |
| H  | -1.17529700 | -4.83831600 | 0.46291900  |
| O  | 3.00741500  | -3.17282500 | 1.10952900  |
| C  | 2.67384000  | -1.37245000 | 2.63863100  |
| H  | 3.74915100  | -1.18717500 | 2.54420800  |
| H  | 2.11430000  | -0.43013200 | 2.56266100  |
| H  | 2.48701700  | -1.78782400 | 3.63905000  |
| C  | 2.57693500  | -0.29847300 | -0.49267200 |
| C  | 3.75050500  | -0.99015700 | -0.69609600 |
| H  | 3.65796900  | -2.07053800 | -0.82685700 |
| C  | 2.54051900  | 1.15235600  | -0.09460000 |
| H  | 2.39142200  | 1.81484200  | -0.96051900 |
| H  | 1.70305800  | 1.35126400  | 0.58915200  |
| H  | 3.46405800  | 1.46153300  | 0.41047100  |
| C  | -1.09462200 | 3.16177900  | 0.39858300  |
| C  | -0.41626500 | 3.19293300  | 1.62147400  |
| C  | -0.67971300 | 3.87700800  | -0.72976100 |

|   |             |             |             |
|---|-------------|-------------|-------------|
| C | 0.72149800  | 3.99677500  | 1.70168100  |
| C | 0.46410700  | 4.66467800  | -0.60321600 |
| C | 1.15610600  | 4.72671300  | 0.60132000  |
| H | 1.26603300  | 4.05033300  | 2.64389600  |
| H | 0.80871100  | 5.23829900  | -1.46284500 |
| H | 2.04122000  | 5.35455100  | 0.68462600  |
| C | -3.96183000 | -0.73586400 | -0.20736200 |
| C | -4.19746500 | -1.15385100 | -1.52085100 |
| C | -4.15127200 | -1.55806200 | 0.90817200  |
| C | -4.65869600 | -2.45824900 | -1.70241800 |
| C | -4.62349900 | -2.85020400 | 0.67897500  |
| C | -4.87828700 | -3.29484600 | -0.61396200 |
| H | -4.85636600 | -2.81287800 | -2.71313800 |
| H | -4.78874200 | -3.51245800 | 1.52860600  |
| H | -5.25056700 | -4.30468200 | -0.77526300 |
| C | -3.82878900 | -1.07638000 | 2.29060900  |
| H | -4.40941600 | -0.18587800 | 2.56856200  |
| H | -4.03730300 | -1.85322400 | 3.03452000  |
| H | -2.76658700 | -0.79879000 | 2.37866200  |
| C | -3.95594300 | -0.24096000 | -2.68481400 |
| H | -4.45268400 | 0.73066200  | -2.55767700 |
| H | -2.88348500 | -0.03585600 | -2.81769400 |
| H | -4.32530200 | -0.68712700 | -3.61421900 |
| C | -0.86544900 | 2.36762200  | 2.79012600  |
| H | -1.95293300 | 2.40743200  | 2.93895000  |
| H | -0.60264600 | 1.30599400  | 2.64930700  |
| H | -0.38624500 | 2.70614200  | 3.71529300  |
| C | -1.42937800 | 3.78647900  | -2.02434100 |
| H | -1.50022800 | 2.74685000  | -2.37667700 |
| H | -2.45794300 | 4.16161500  | -1.93211600 |
| H | -0.93321600 | 4.37223400  | -2.80532800 |
| H | 0.17458000  | -1.94369900 | 2.09969900  |
| H | 1.78331500  | -2.36731000 | -2.24773400 |
| C | 5.12043200  | -0.53574000 | -0.66407400 |
| C | 5.53608300  | 0.76604000  | -0.99909100 |
| C | 6.09224600  | -1.48302000 | -0.28744200 |
| C | 6.87849100  | 1.10620200  | -0.94189200 |
| H | 4.81060800  | 1.49512900  | -1.35279500 |
| C | 7.42895000  | -1.12873100 | -0.20271100 |
| H | 5.77046300  | -2.49408000 | -0.03573000 |
| C | 7.82363700  | 0.16636600  | -0.53253800 |
| H | 7.19493300  | 2.10831700  | -1.22348800 |
| H | 8.16818500  | -1.86383900 | 0.10774700  |
| H | 8.87517900  | 0.44230800  | -0.48305600 |

### 7k-TS

Zero-point correction= 0.632770 (Hartree/Particle)

Thermal correction to Energy= 0.672966

Thermal correction to Enthalpy= 0.673910

Thermal correction to Gibbs Free Energy= 0.556482

Sum of electronic and zero-point Energies= -1728.834371

Sum of electronic and thermal Energies= -1728.794175

Sum of electronic and thermal Enthalpies= -1728.793230

Sum of electronic and thermal Free Energies= -1728.910658

M06/6-311++G(d,p)-SDD/SMD//M06/6-31G(d)-LANL2DZ energy in DCE solvent = -1730.28457426

Cartesian coordinates:

|   |            |             |            |
|---|------------|-------------|------------|
| C | 4.15772300 | -1.56194300 | 1.31026800 |
| C | 5.02878800 | -2.48367800 | 0.50812700 |

|    |             |             |             |
|----|-------------|-------------|-------------|
| C  | 2.85605000  | -1.88515400 | 1.69422400  |
| O  | 4.58261500  | -3.24006500 | -0.32990800 |
| H  | 4.70281900  | -0.93031600 | 2.01788600  |
| C  | 2.25455400  | -1.34464600 | 2.94464700  |
| H  | 1.69747900  | -2.12835900 | 3.47074500  |
| H  | 2.99693800  | -0.90468400 | 3.61628100  |
| H  | 1.51898300  | -0.57193200 | 2.65743400  |
| C  | 6.49421700  | -2.37276900 | 0.81884300  |
| H  | 7.06979600  | -2.99368000 | 0.12713200  |
| H  | 6.82239700  | -1.32499600 | 0.74526600  |
| H  | 6.69099700  | -2.69725100 | 1.84997100  |
| C  | 1.14871500  | -0.74168600 | -0.26647100 |
| C  | 1.33854900  | -2.16910400 | -0.06583800 |
| Au | -0.84572000 | -0.17884900 | -0.11750000 |
| N  | 2.04441200  | -2.60823700 | 0.91845100  |
| C  | -5.04521800 | 0.69386000  | 0.03477300  |
| C  | -4.53048800 | 1.93788800  | 0.18929900  |
| H  | -6.06556000 | 0.33520100  | -0.00695800 |
| H  | -5.00240000 | 2.90419400  | 0.31106600  |
| N  | -3.96794200 | -0.17125900 | -0.07936400 |
| N  | -3.15200600 | 1.79880000  | 0.16436000  |
| C  | -2.80038700 | 0.50294500  | -0.00120700 |
| C  | 2.20984400  | 0.13448700  | -0.29573400 |
| C  | 3.53616400  | -0.41098900 | -0.47911200 |
| C  | 1.99697500  | 1.61785400  | -0.16566500 |
| H  | 0.97061600  | 1.88523500  | -0.44680600 |
| H  | 2.13672100  | 1.95241600  | 0.87452000  |
| H  | 2.68617300  | 2.19757500  | -0.79142100 |
| C  | -2.20149300 | 2.87218100  | 0.26430500  |
| C  | -1.71295400 | 3.43730200  | -0.91829500 |
| C  | -1.79339900 | 3.28225000  | 1.53786500  |
| C  | -0.77794000 | 4.46615200  | -0.79741500 |
| C  | -0.85565000 | 4.31177000  | 1.60963600  |
| C  | -0.35420500 | 4.89949200  | 0.45344500  |
| H  | -0.38550800 | 4.93216700  | -1.70062900 |
| H  | -0.52350600 | 4.65727300  | 2.58807400  |
| H  | 0.37002900  | 5.70858700  | 0.52842600  |
| C  | -4.07411200 | -1.58917800 | -0.29526000 |
| C  | -4.12429800 | -2.05095000 | -1.61422400 |
| C  | -4.11975000 | -2.43233400 | 0.81873200  |
| C  | -4.23350400 | -3.42778500 | -1.80531500 |
| C  | -4.22924600 | -3.80182600 | 0.57891000  |
| C  | -4.28681300 | -4.29426800 | -0.71963800 |
| H  | -4.27929500 | -3.81916400 | -2.82089100 |
| H  | -4.27215800 | -4.48549200 | 1.42597200  |
| H  | -4.37680700 | -5.36577800 | -0.88753500 |
| C  | -4.03923800 | -1.88515500 | 2.21186400  |
| H  | -4.80243200 | -1.11748900 | 2.39955600  |
| H  | -4.17679300 | -2.68043400 | 2.95233400  |
| H  | -3.06280200 | -1.41572500 | 2.40215000  |
| C  | -4.05001700 | -1.10298500 | -2.77299700 |
| H  | -4.83502100 | -0.33517300 | -2.73013100 |
| H  | -3.08668000 | -0.57232300 | -2.79651700 |
| H  | -4.15887200 | -1.63756400 | -3.72266200 |
| C  | -2.33776600 | 2.63132400  | 2.77330300  |
| H  | -3.42560100 | 2.75861900  | 2.86003000  |
| H  | -2.14458500 | 1.54862400  | 2.77736200  |
| H  | -1.88268200 | 3.05865200  | 3.67331500  |
| C  | -2.14951900 | 2.93828400  | -2.26270000 |



|   |             |             |             |
|---|-------------|-------------|-------------|
| H | -1.68780000 | 1.96602800  | -2.49354800 |
| H | -3.23697800 | 2.79571900  | -2.32190200 |
| H | -1.85762000 | 3.63811700  | -3.05321500 |
| H | 0.74610900  | -2.89718700 | -0.62597400 |
| H | 3.54065600  | -1.38567100 | -0.96944800 |
| C | 4.76053700  | 0.35301800  | -0.69986800 |
| C | 5.64194100  | -0.10230300 | -1.69373400 |
| C | 5.12064500  | 1.47258100  | 0.06696300  |
| C | 6.83124000  | 0.56978900  | -1.94348400 |
| H | 5.38125000  | -0.98851600 | -2.27295200 |
| C | 6.32154400  | 2.12450400  | -0.16699200 |
| H | 4.47017000  | 1.80818500  | 0.87347300  |
| C | 7.17398200  | 1.68082000  | -1.17835300 |
| H | 7.49746000  | 0.21842000  | -2.72831700 |
| H | 6.59906800  | 2.98286700  | 0.44119000  |
| H | 8.11231000  | 2.19983300  | -1.36308700 |
